# Supplementary material for: Synthesis of New Hydrazone Derivatives for MAO Enzymes Inhibitory Activity
Source: PubMed Central journal article supplement (PMC6152084; doi:10.3390/molecules22081381), 2017-08-20
Supplement: molecules-22-01381-s001.pdf [file molecules-22-01381-s001.pdf]

## DOPNALAB

| Item               | Value                                          |
|--------------------|------------------------------------------------|
| Acquired Date&Time | 5.10.2016 09:43:26                             |
| Acquired by        | System Administrator                           |
| Filename           | C:\Users\dopnalab\Desktop\derya\fa\fa-2a2.ispd |
| Spectrum name      | fa-2a2                                         |
| Sample name        | fa_2a                                          |
| Sample ID          |                                                |
| Option             |                                                |
| Comment            |                                                |
| No. of Scans       | 10                                             |
| Resolution         | 4 (cm-1)                                       |
| Apodization        | Happ-Genzel                                    |

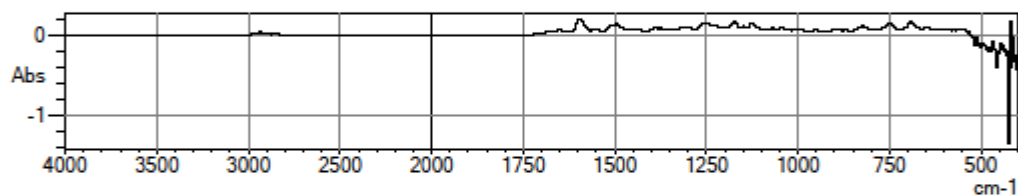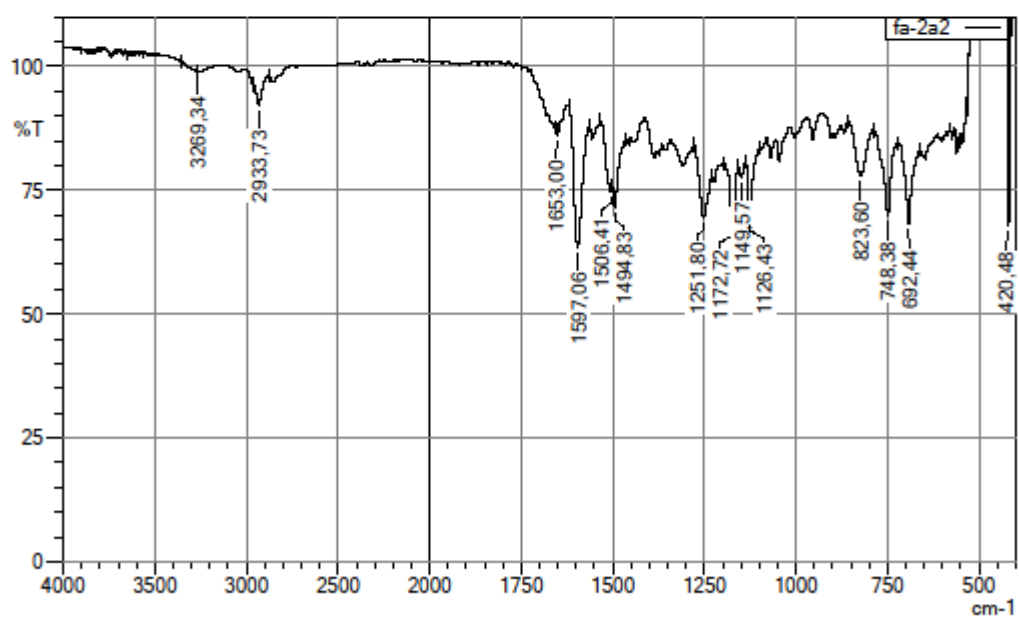

**Spectra 1.** IR spectra of the compound 2a

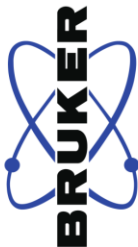

Current Data Parameters  
NAME fa  
EXPNO 474  
PROCNO 1

F2 - Acquisition Parameters  
Date\_ 20160601  
Time 2.56  
INSTRUM FOURIER300  
PROBHD 5 mm DUL 13C-1  
PULPROG zg  
ID 16384  
SOLVENT DMSO  
NS 16  
DS 0  
SWH 6103.516 Hz  
FIDRES 0.372529 Hz  
AQ 1.3421773 sec  
RG 17.027  
DW 81.920 usec  
DE 6.50 usec  
TE 297.9 K  
D1 3.00000000 sec  
TD0 1

==== CHANNEL f1 =====  
SFO1 300.1818537 MHz  
NUC1 1H  
P1 13.00 usec  
PLW1 10.00000000 W

F2 - Processing parameters  
SI 65836  
SF 300.1800000 MHz  
WDW EM  
SSB 0  
LB 0.30 Hz  
GB 0  
PC 1.00

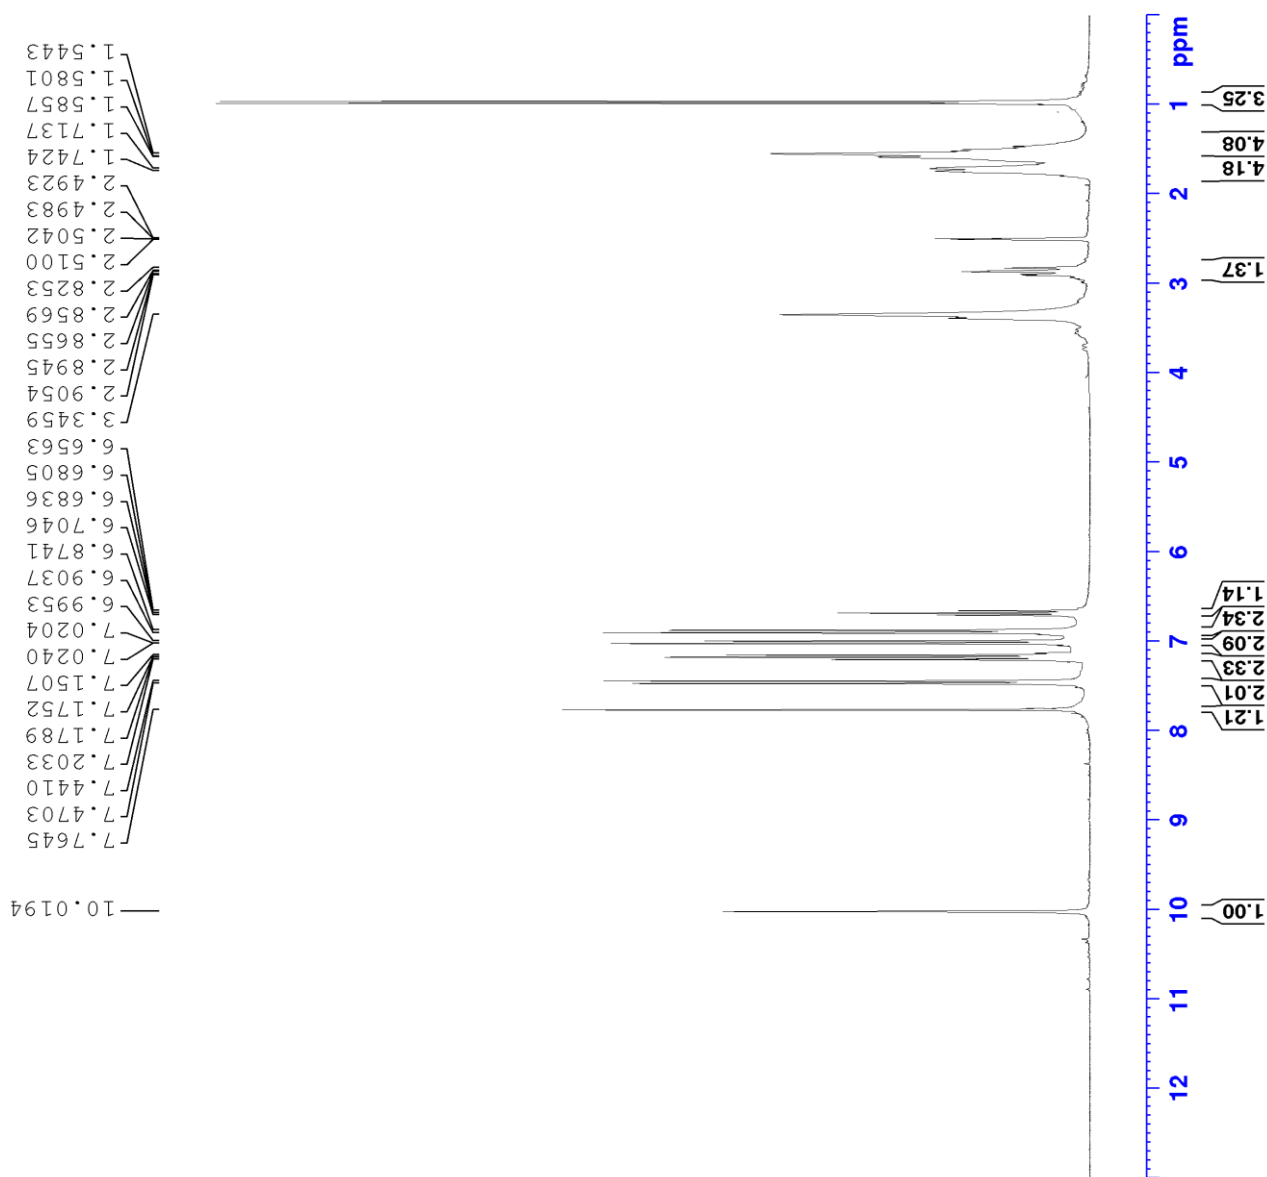

Spectra 2. <sup>1</sup>H NMR spectra of the compound 2a

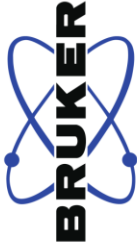

49.69  
42.56  
40.81  
40.54  
40.26  
39.98  
39.70  
39.42  
39.15  
31.06  
25.94  
18.92  
13.32

150.99  
146.23  
137.83  
129.47  
127.22  
125.72  
118.43  
115.80  
112.12

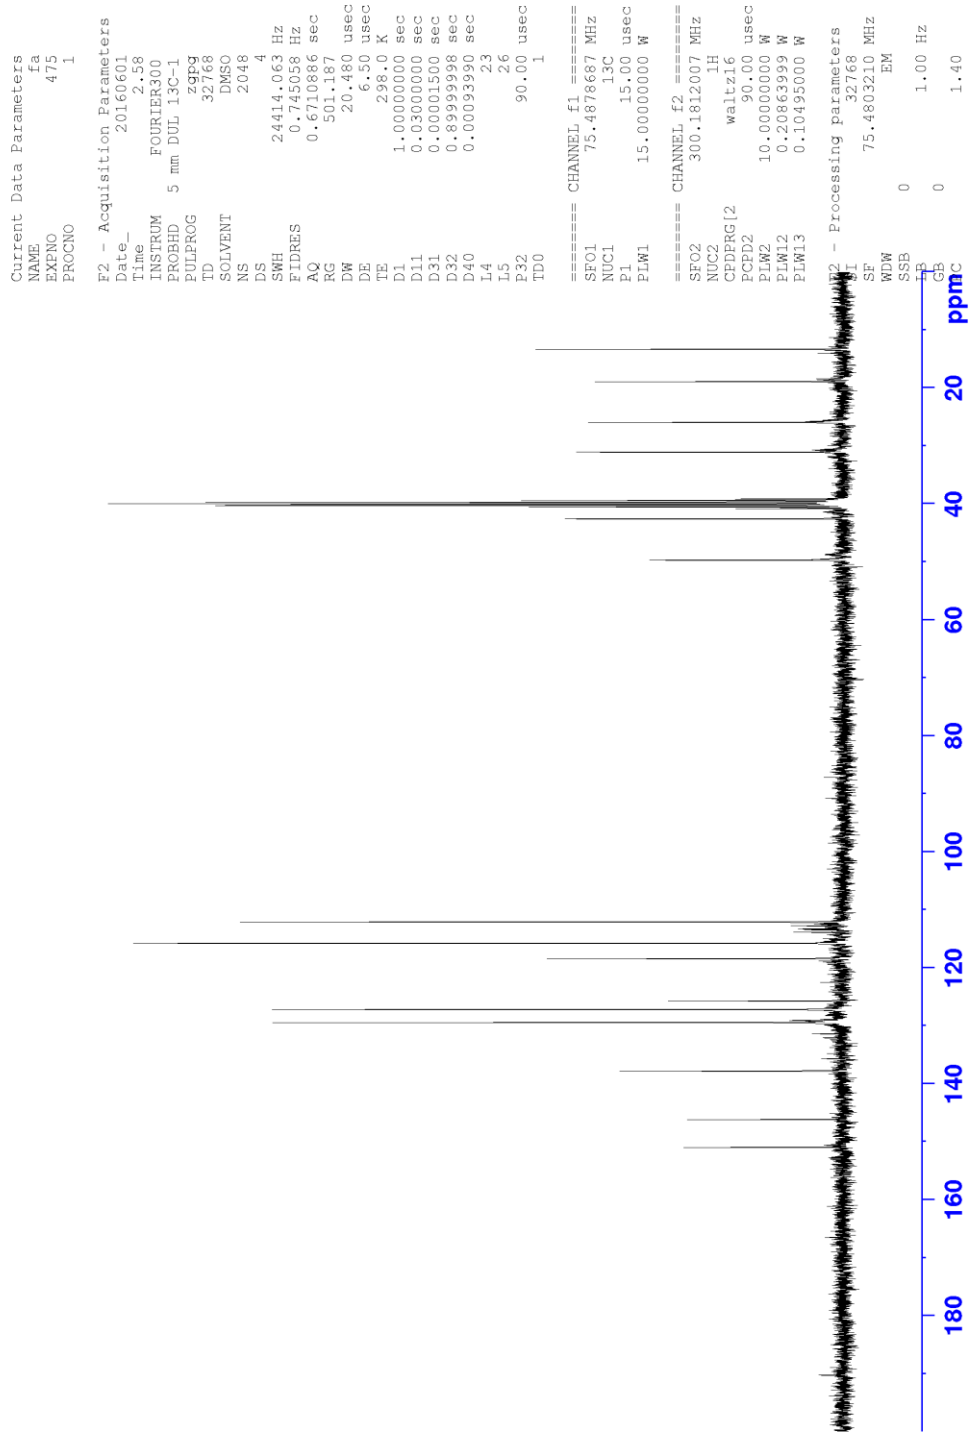

Spectra 3. <sup>13</sup>C NMR spectra of the compound 2a

Data File: C:\LabSolutions\Data\Analiz\dera\FA-1\_1.lcd

| Elmt | Val. | Min | Max | Elmt | Val. | Min | Max | Elmt | Val. | Min | Max | Use Adduct |
|------|------|-----|-----|------|------|-----|-----|------|------|-----|-----|------------|
| H    | 1    | 0   | 50  | O    | 2    | 0   | 6   | Cl   | 1    | 0   | 0   | H          |
| C    | 4    | 0   | 50  | F    | 1    | 0   | 0   | Br   | 1    | 0   | 0   |            |
| N    | 3    | 0   | 3   | S    | 2    | 0   | 0   | Pd   | 2    | 0   | 0   |            |

Error Margin (ppm): 5  
 HC Ratio: unlimited  
 Max Isotopes: 3  
 MSn Iso RI (%): 10.00

DBE Range: 10.0 - 20.0  
 Apply N Rule: yes  
 Isotope RI (%): 1.00  
 MSn Logic Mode: AND

Electron Ions: both  
 Use MSn Info: no  
 Isotope Res: 10000  
 Max Results: 500

Event#: 1 MS(E+) Ret. Time : 0.960 -> 1.107 Scan#: 145 -> 167

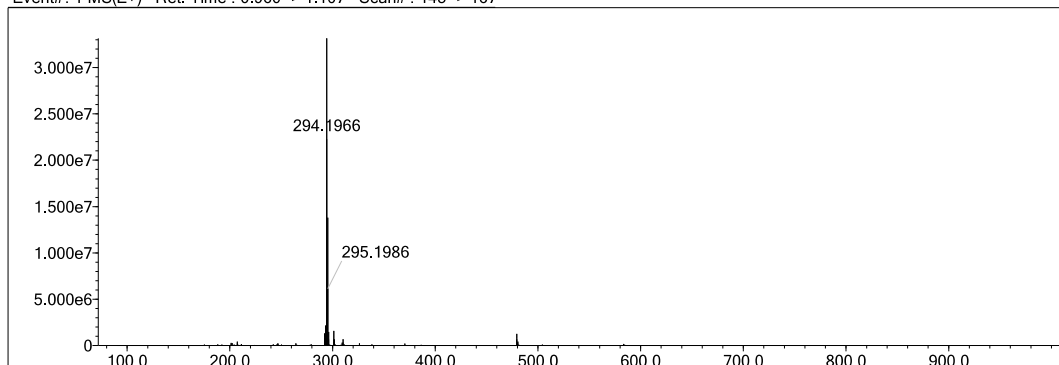

Measured region for 294.1966 m/z

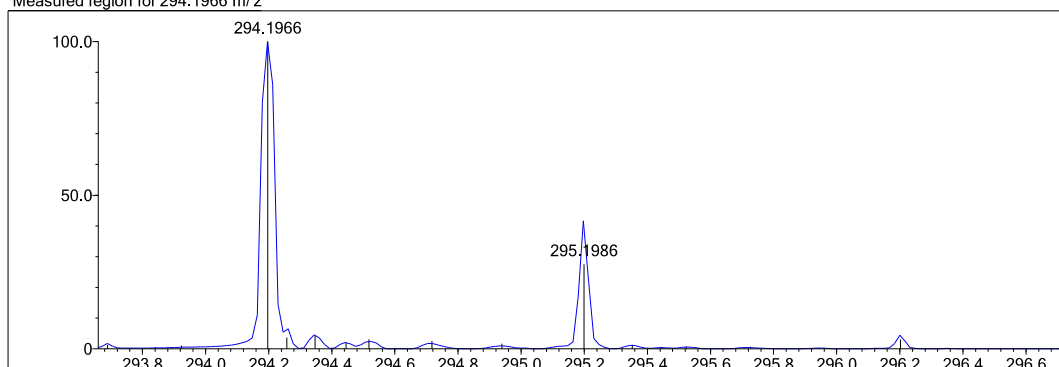

C19 H23 N3 [M+H]+ : Predicted region for 294.1965 m/z

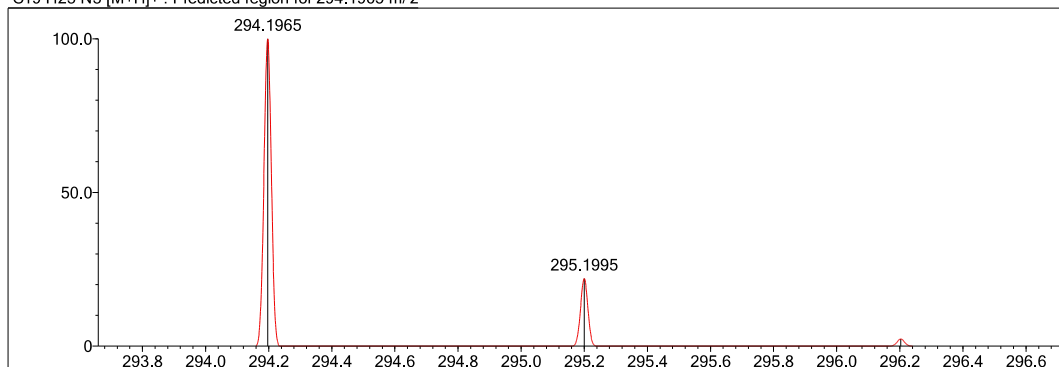

| Rank | Score | Formula (M) | Ion    | Meas. m/z | Pred. m/z | Df. (mDa) | Df. (ppm) | Iso   | DBE  |
|------|-------|-------------|--------|-----------|-----------|-----------|-----------|-------|------|
| 1    | 68.06 | C19 H23 N3  | [M+H]+ | 294.1966  | 294.1965  | 0.1       | 0.34      | 68.06 | 10.0 |

**Spectra 4.** HRMS spectra of the compound 2a

## DOPNALAB

| Item               | Value                                       |
|--------------------|---------------------------------------------|
| Acquired Date&Time | 5.10.2016 09:48:36                          |
| Acquired by        | System Administrator                        |
| Filename           | C:\Users\dopnalab\Desktop\derya\fa-2b1.jspd |
| Spectrum name      | fa-2b1                                      |
| Sample name        | fa_2b                                       |
| Sample ID          |                                             |
| Option             |                                             |
| Comment            |                                             |
| No. of Scans       | 10                                          |
| Resolution         | 4 (cm-1)                                    |
| Apodization        | Happ-Genzel                                 |

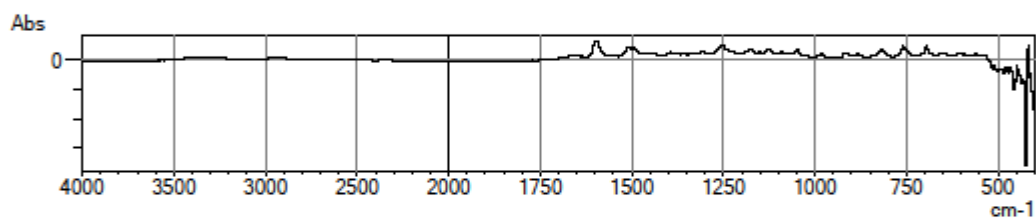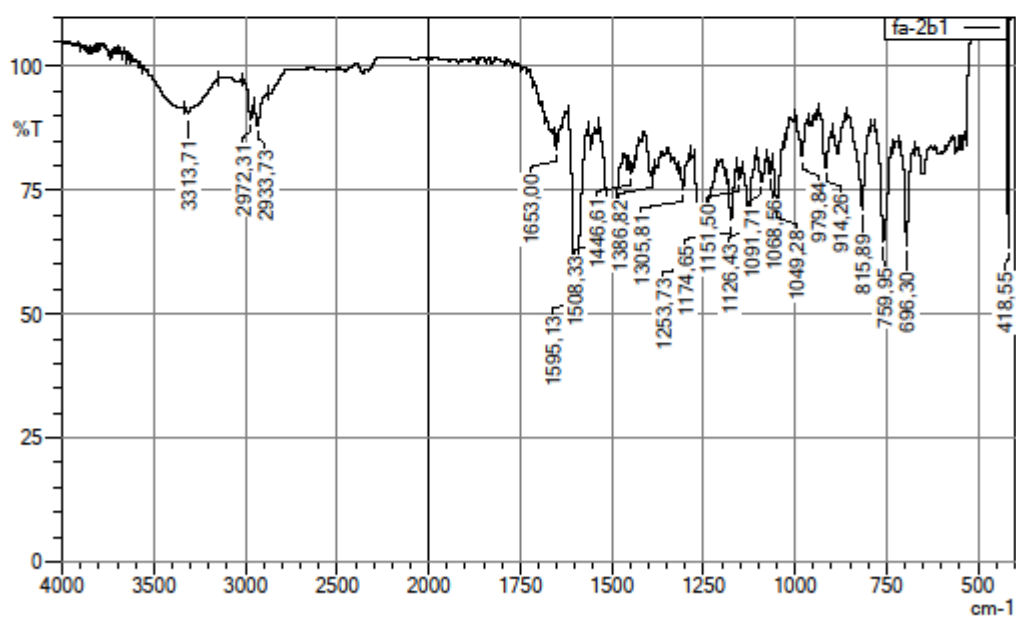

Spectra 5. IR spectra of the compound 2b

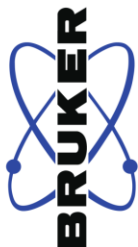

Current Data Parameters  
NAME fa  
EXPNO 476  
PROCNO 1

F2 - Acquisition Parameters

Date\_ 20160601  
Time\_ 3.58  
INSTRUM FOURIER300  
PROBHD 5 mm DUL 13C-1  
PULPROG zg  
TD 16384  
SOLVENT DMSO  
NS 16  
DS 0  
SWH 6103.516 Hz  
FIDRES 0.372529 Hz  
AQ 1.3421773 sec  
RG 7.91562  
DW 81.920 usec  
DE 6.50 usec  
TE 297.9 K  
D1 3.00000000 sec  
TD0 1

==== CHANNEL f1 =====  
SFO1 300.1618537 MHz  
NUC1 1H  
P1 13.00 usec  
PLW1 10.00000000 W

F2 - Processing parameters

SI 65536  
SF 300.1800000 MHz  
WDW EM  
SSB 0  
LB 0.30 Hz  
GB 0  
PC 1.00

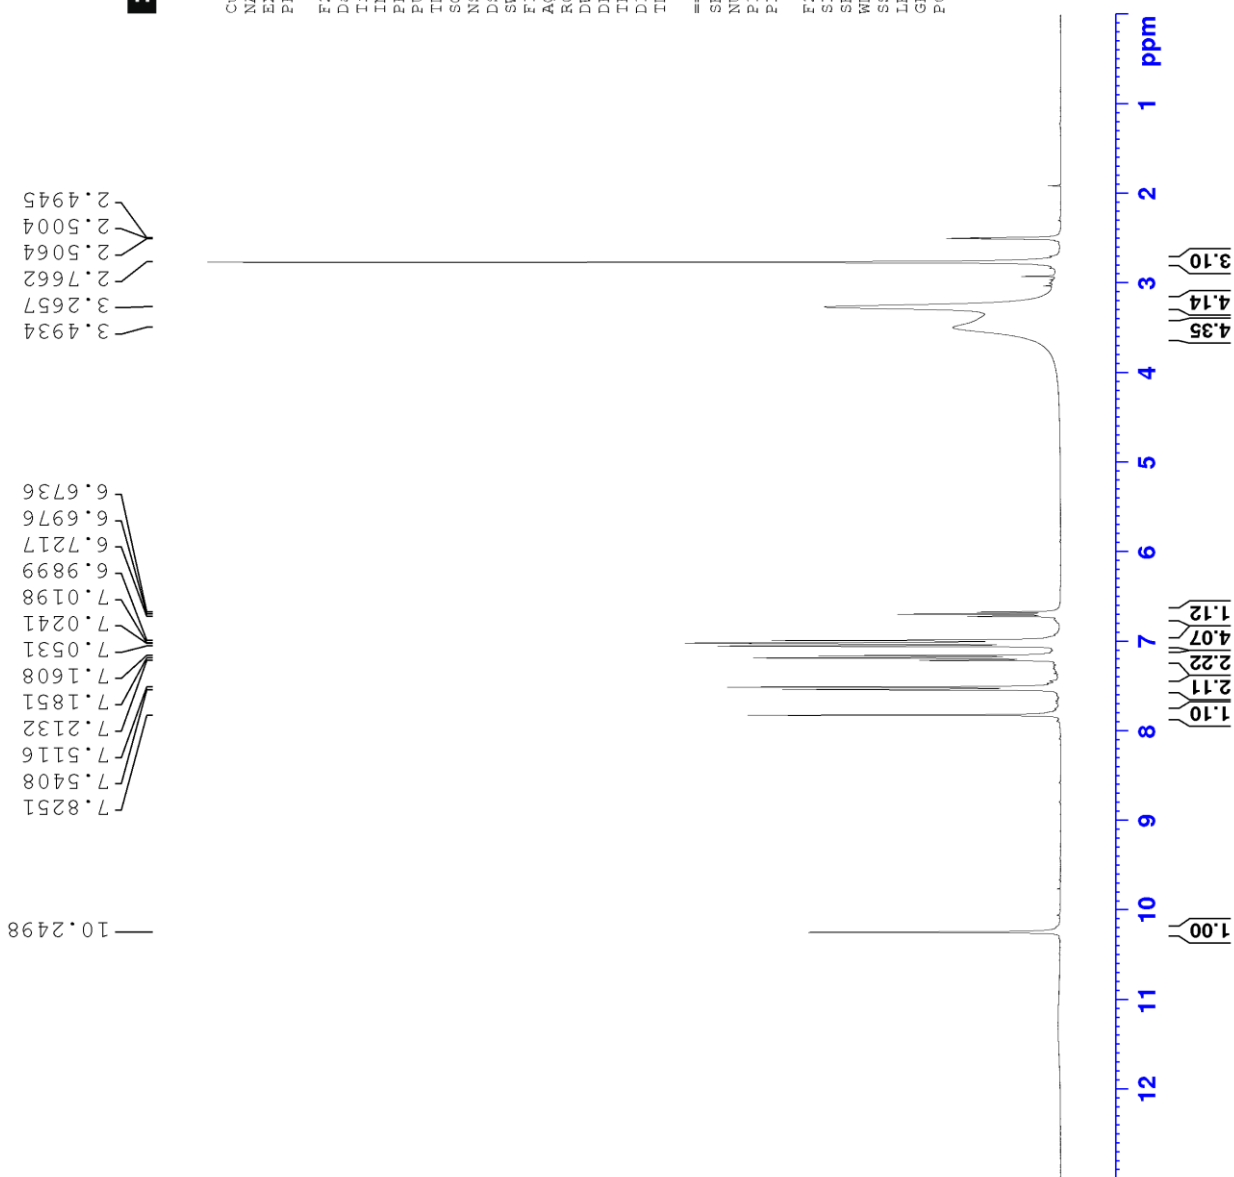

Spectra 6. <sup>1</sup>H NMR spectra of the compound 2b

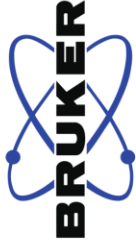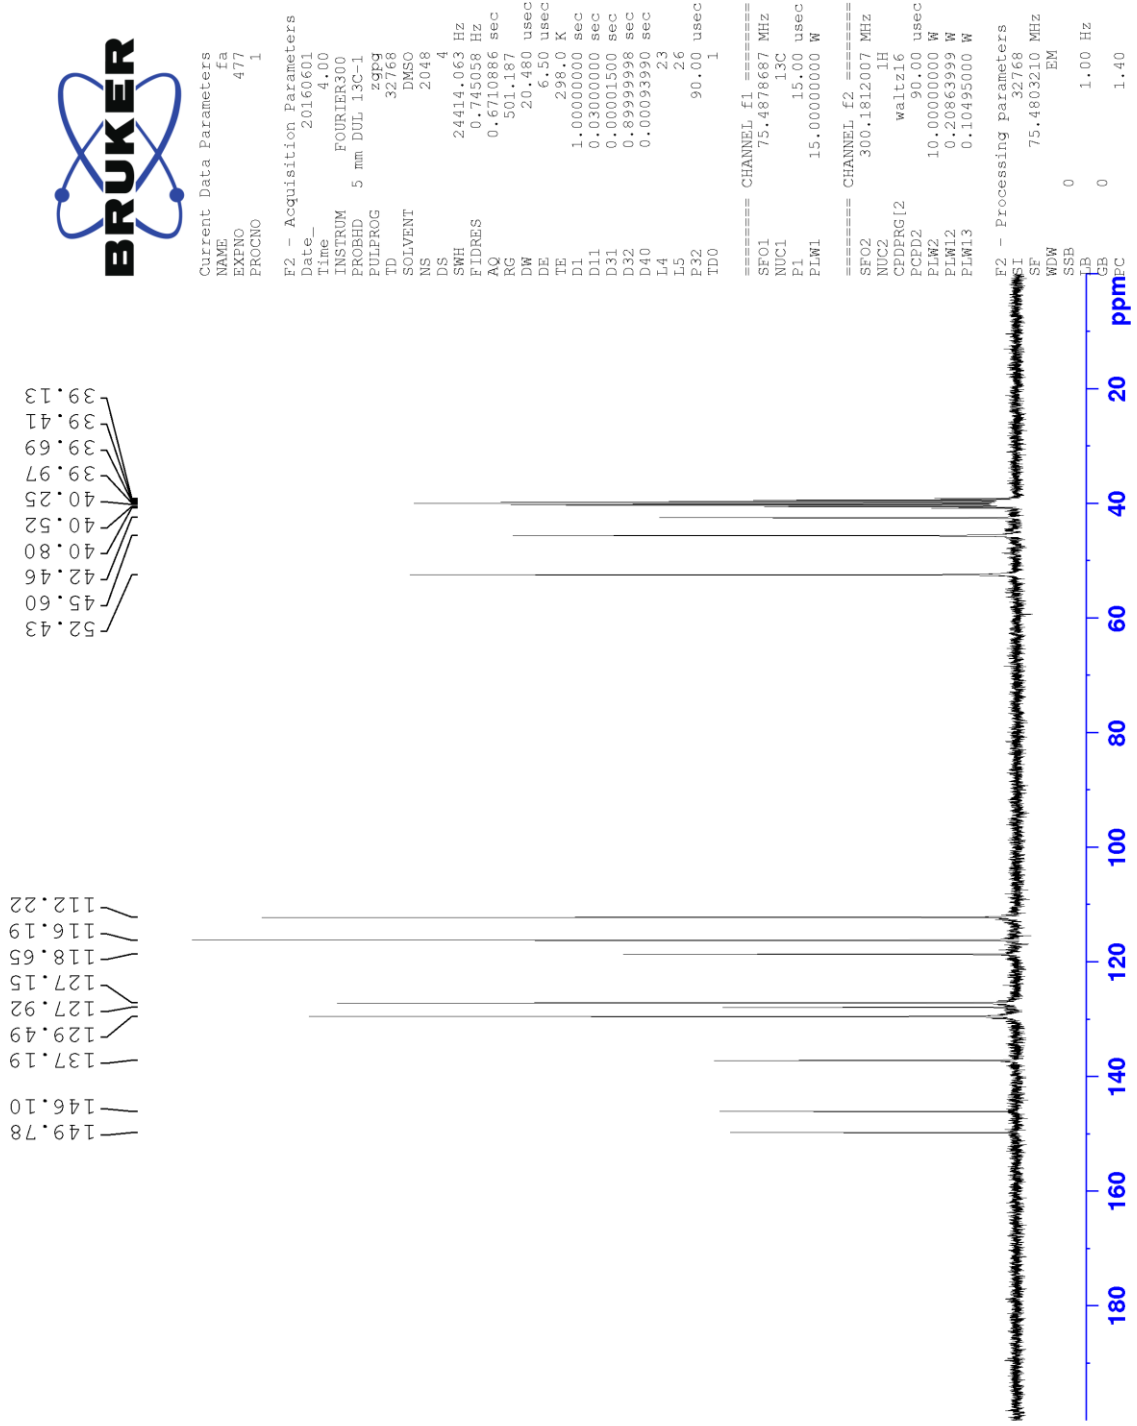

Spectra 7. <sup>13</sup>C NMR spectra of the compound 2b

Data File: C:\LabSolutions\Data\Analiz\derya\FA-2\_2.lcd

| Elmt | Val. | Min | Max | Elmt | Val. | Min | Max | Elmt | Val. | Min | Max | Use Adduct |
|------|------|-----|-----|------|------|-----|-----|------|------|-----|-----|------------|
| H    | 1    | 0   | 50  | O    | 2    | 0   | 6   | Cl   | 1    | 0   | 0   | H          |
| C    | 4    | 0   | 50  | F    | 1    | 0   | 0   | Br   | 1    | 0   | 0   |            |
| N    | 3    | 0   | 4   | S    | 2    | 0   | 0   | Pd   | 2    | 0   | 0   |            |

Error Margin (ppm): 5  
 HC Ratio: unlimited  
 Max Isotopes: 3  
 MSn Iso RI (%): 10.00

DBE Range: 10.0 - 20.0  
 Apply N Rule: yes  
 Isotope RI (%): 1.00  
 MSn Logic Mode: AND

Electron Ions: both  
 Use MSn Info: no  
 Isotope Res: 10000  
 Max Results: 500

Event#: 1 MS(E+) Ret. Time : 4.347 -> 4.413 Scan# : 653 -> 663

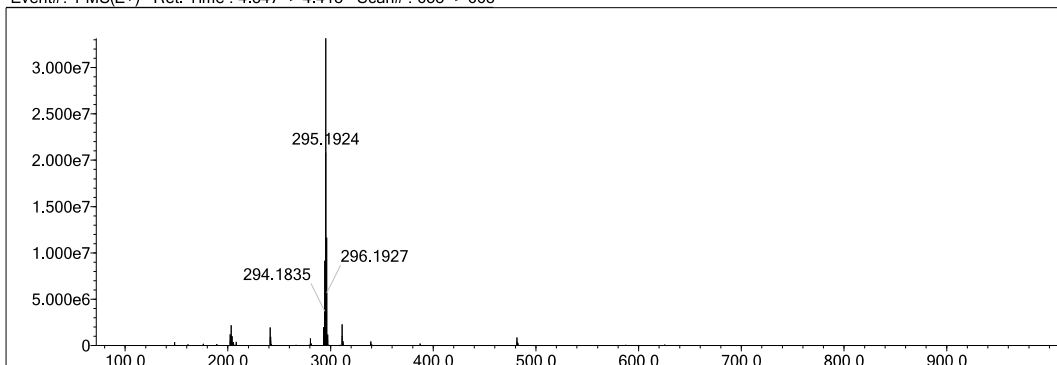

Measured region for 295.1924 m/z

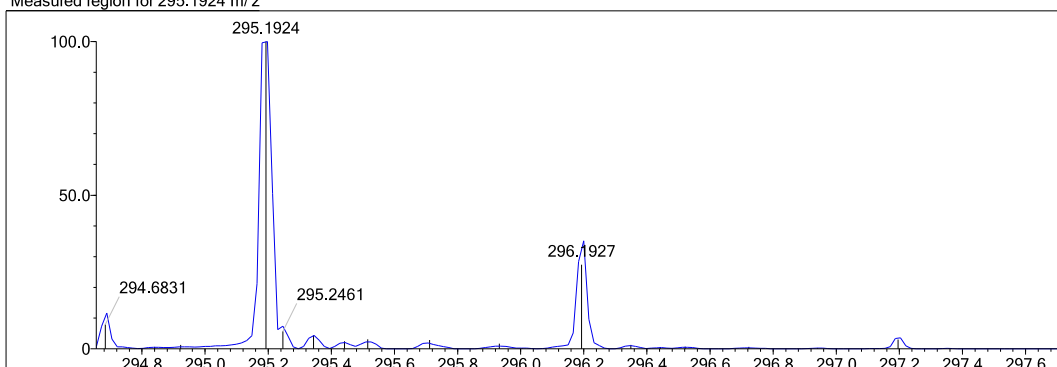

C18 H22 N4 [M+H]<sup>+</sup> : Predicted region for 295.1917 m/z

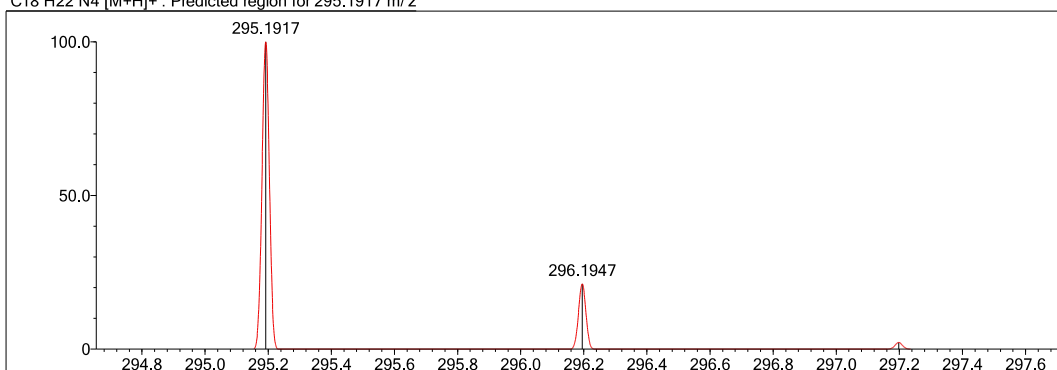

| Rank | Score | Formula (M) | Ion                | Meas. m/z | Pred. m/z | Df. (mDa) | Df. (ppm) | Iso   | DBE  |
|------|-------|-------------|--------------------|-----------|-----------|-----------|-----------|-------|------|
| 1    | 64.39 | C18 H22 N4  | [M+H] <sup>+</sup> | 295.1924  | 295.1917  | 0.7       | 2.37      | 66.68 | 10.0 |

**Spectra 8.** HRMS spectra of the compound 2b



## DOPNALAB

| Item               | Value                                          |
|--------------------|------------------------------------------------|
| Acquired Date&Time | 5.10.2016 09:53:15                             |
| Acquired by        | System Administrator                           |
| Filename           | C:\Users\dopnalab\Desktop\derya\faifa-2c1.jspd |
| Spectrum name      | fa-2c1                                         |
| Sample name        | fa_2c                                          |
| Sample ID          |                                                |
| Option             |                                                |
| Comment            |                                                |
| No. of Scans       | 10                                             |
| Resolution         | 4 [cm-1]                                       |
| Apodization        | Happ-Genzel                                    |

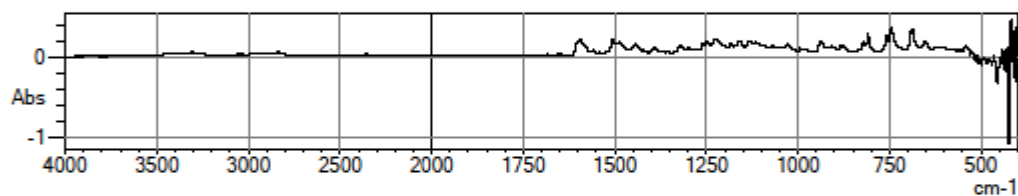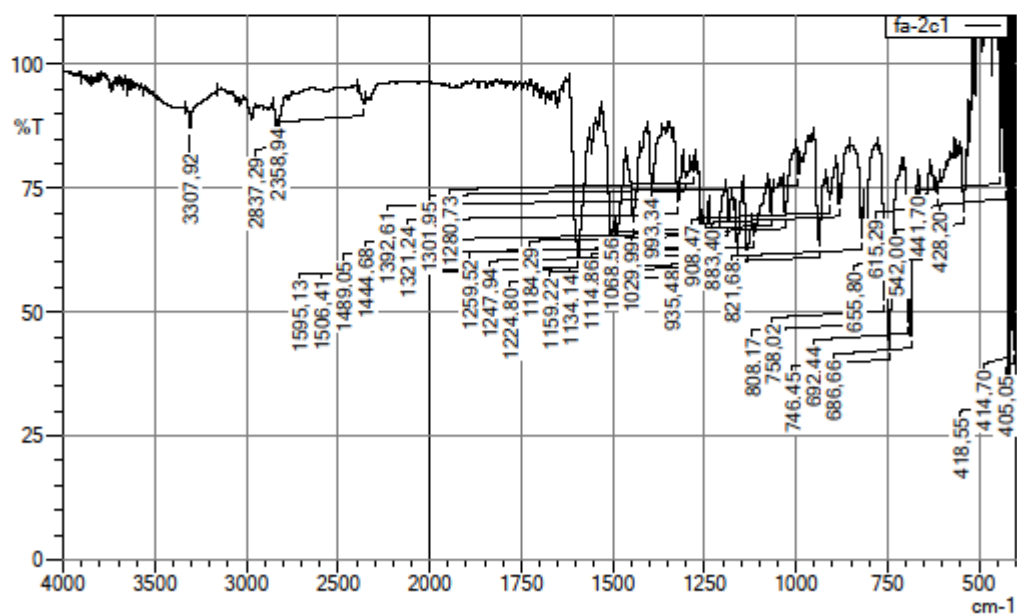

**Spectra 9.** IR spectra of the compound 2c

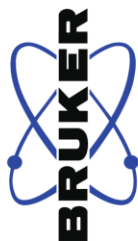

Current Data Parameters  
NAME fa  
EXPNO 478  
PROCNO 2

F2 - Acquisition Parameters  
Date\_ 20160603  
Time\_ 10.30  
INSTRUM FOURIER300  
PROBHD 5 mm DUL 13C-1  
PULPROG zg  
TD 16384  
SOLVENT DMSO  
NS 16  
DS 0  
SWH 6103.516 Hz  
FIDRES 0.372529 Hz  
AQ 1.3421773 sec  
RG 7.3935  
DW 81.920 usec  
DE 6.50 usec  
TE 297.6 K  
D1 3.00000000 sec  
TD0 1

===== CHANNEL f1 =====  
SFO1 300.1818537 MHz  
NUC1 1H  
P1 13.00 usec  
PLW1 10.00000000 W

F2 - Processing parameters  
SI 65536  
SF 300.1800000 MHz  
WDW EM  
SSB 0  
LB 0.30 Hz  
GB 0  
PC 1.00

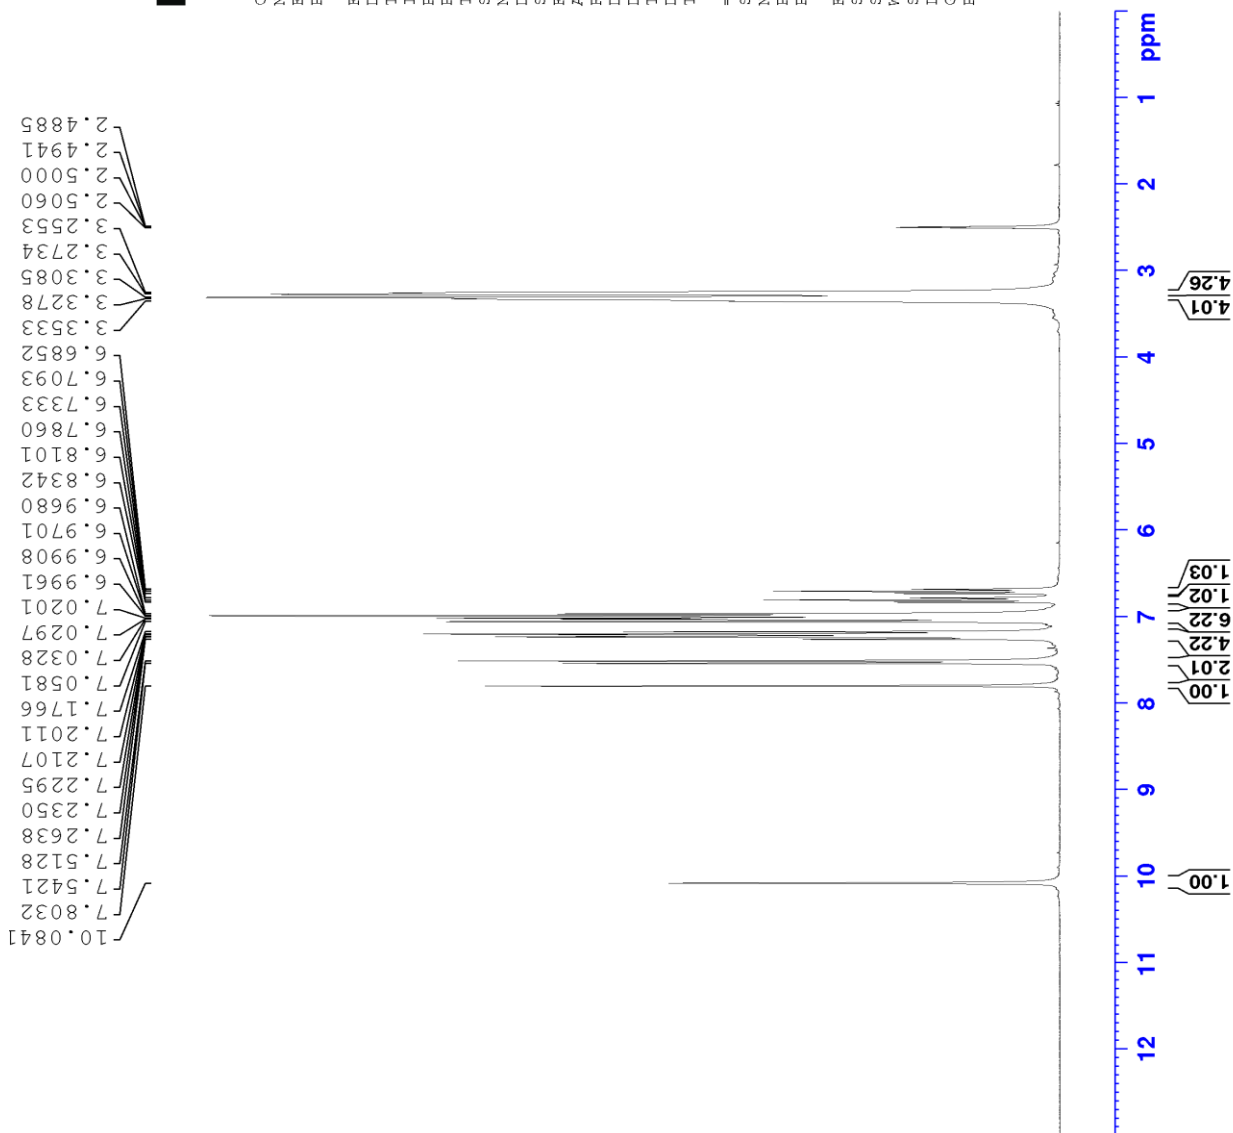

Spectra 10. <sup>1</sup>H NMR spectra of the compound 2c

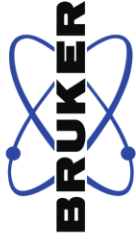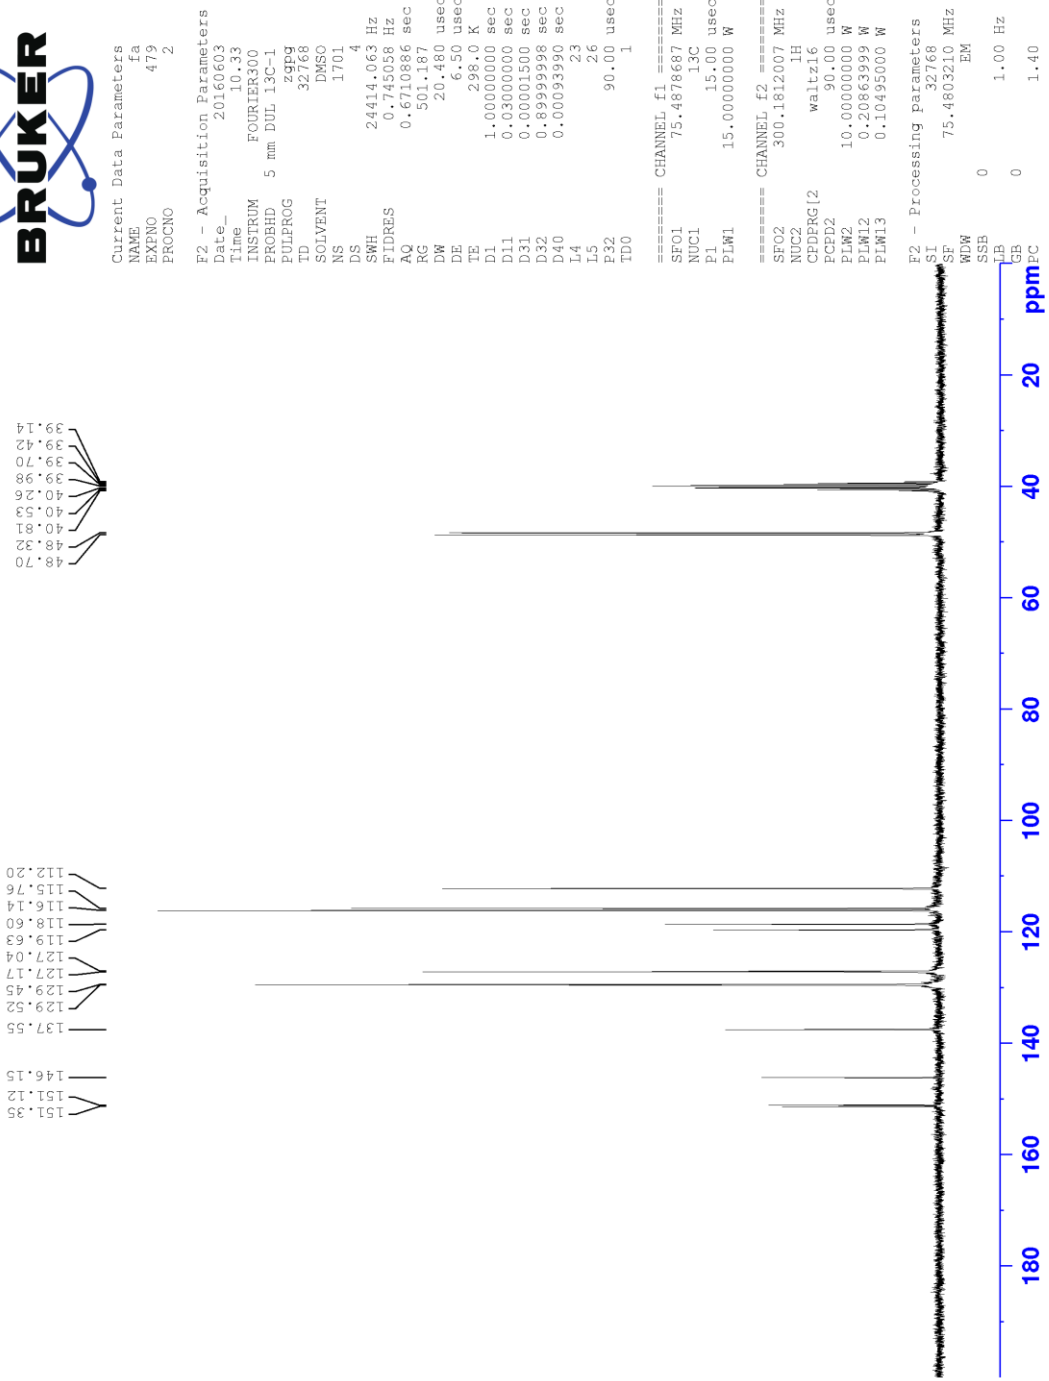

Spectra 11. <sup>13</sup>C NMR spectra of the compound 2c

Data File: C:\LabSolutions\Data\Analiz\derya\FA-3\_3.lcd

| Elmt | Val. | Min | Max | Elmt | Val. | Min | Max | Elmt | Val. | Min | Max | Use Adduct |
|------|------|-----|-----|------|------|-----|-----|------|------|-----|-----|------------|
| H    | 1    | 0   | 50  | O    | 2    | 0   | 6   | Cl   | 1    | 0   | 0   | H          |
| C    | 4    | 0   | 50  | F    | 1    | 0   | 0   | Br   | 1    | 0   | 0   |            |
| N    | 3    | 0   | 4   | S    | 2    | 0   | 0   | Pd   | 2    | 0   | 0   |            |

Error Margin (ppm): 5  
 HC Ratio: unlimited  
 Max Isotopes: 3  
 MSn Iso RI (%): 10.00

DBE Range: 10.0 - 20.0  
 Apply N Rule: yes  
 Isotope RI (%): 1.00  
 MSn Logic Mode: AND

Electron Ions: both  
 Use MSn Info: no  
 Isotope Res: 10000  
 Max Results: 500

Event#: 1 MS(E+) Ret. Time : 9.067 -> 9.067 Scan#: 1361 -> 1361

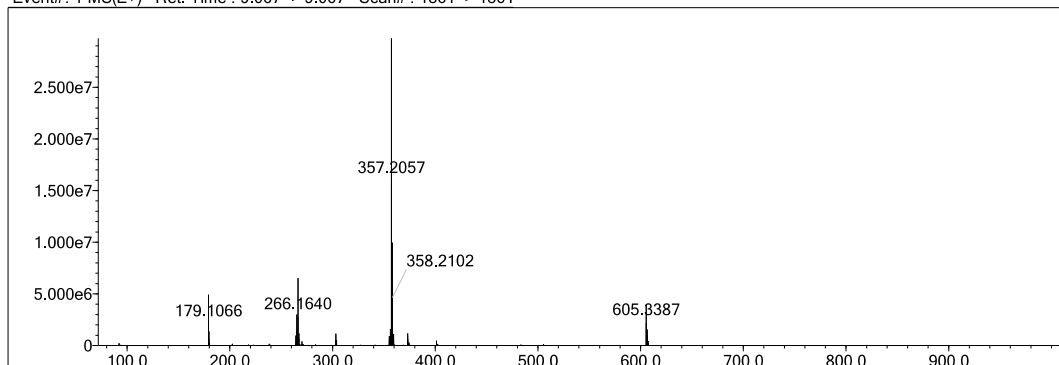

Measured region for 357.2057 m/z

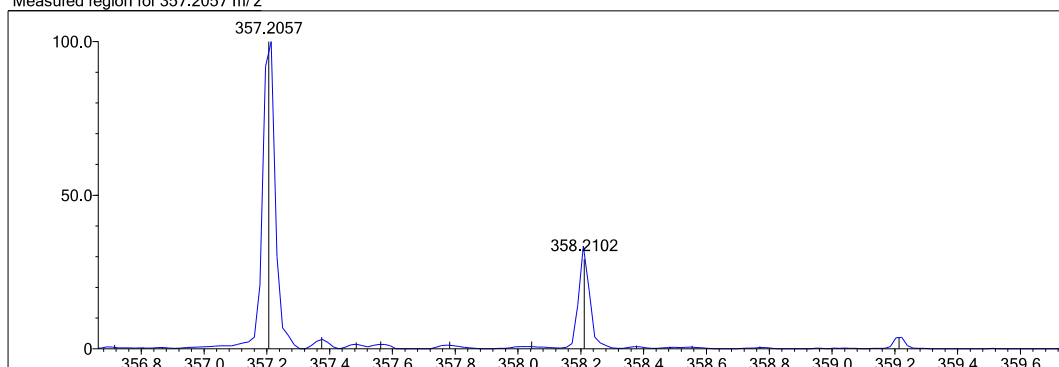

C23 H24 N4 [M+H]<sup>+</sup>: Predicted region for 357.2074 m/z

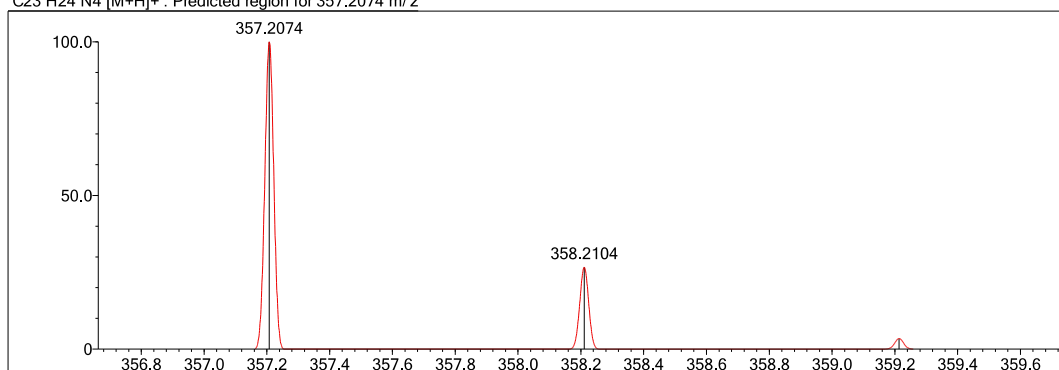

| Rank | Score | Formula (M) | Ion                | Meas. m/z | Pred. m/z | Df. (mDa) | Df. (ppm) | Iso   | DBE  |
|------|-------|-------------|--------------------|-----------|-----------|-----------|-----------|-------|------|
| 1    | 83.47 | C23 H24 N4  | [M+H] <sup>+</sup> | 357.2057  | 357.2074  | -1.7      | -4.76     | 92.13 | 14.0 |

Spectra 12. HRMS spectra of the compound 2c

## DOPNALAB

| Item               | Value                                          |
|--------------------|------------------------------------------------|
| Acquired Date&Time | 5.10.2016 09:56:50                             |
| Acquired by        | System Administrator                           |
| Filename           | C:\Users\dopnalab\Desktop\derya\faifa-2d1.ispd |
| Spectrum name      | fa-2d1                                         |
| Sample name        | fa_2d                                          |
| Sample ID          |                                                |
| Option             |                                                |
| Comment            |                                                |
| No. of Scans       | 10                                             |
| Resolution         | 4 [cm-1]                                       |
| Apodization        | Happ-Genzel                                    |

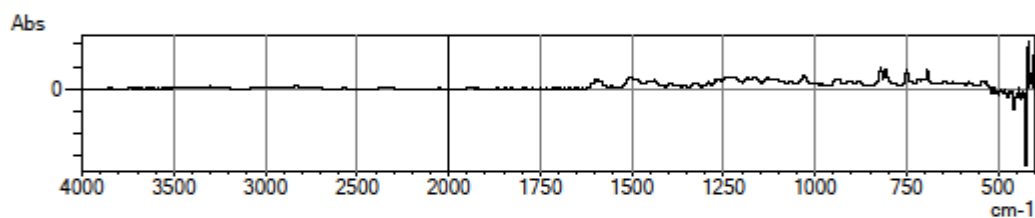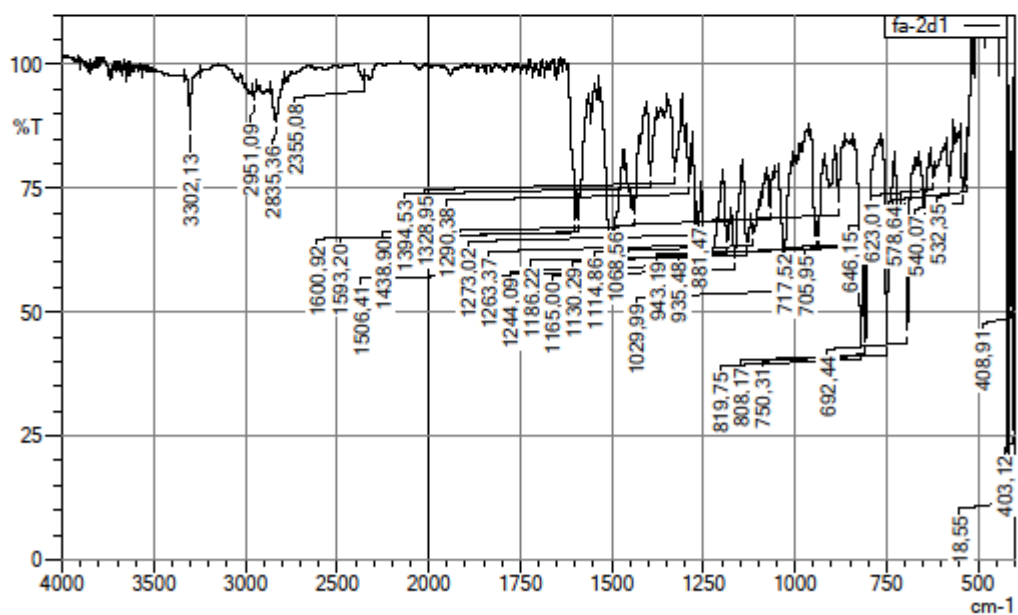

**Spectra 13.** IR spectra of the compound 2d

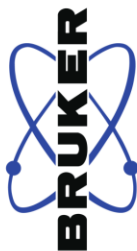

Current Data Parameters  
NAME fa  
EXPNO 480  
PROCNO 2

F2 - Acquisition Parameters  
Date\_ 20160603  
Time 11.24  
INSTRUM FOURIER300  
PROBHD 5 mm DUL 13C-1  
PULPROG zg  
TD 16384  
SOLVENT DMSO  
NS 16  
DS 0  
SWH 6103.516 Hz  
FIDRES 0.372529 Hz  
AQ 1.342173 sec  
RG 18.2585  
DW 81.920 usec  
DE 6.50 usec  
TE 297.6 K  
D1 3.0000000 sec  
TD0 1

==== CHANNEL f1 =====  
SFO1 300.1818537 MHz  
NUC1 1H  
PI 13.00 usec  
PLW1 10.00000000 W

F2 - Processing parameters  
SI 65536  
SF 300.1800000 MHz  
WDW EM  
SSB 0  
LB 0.30 Hz  
GB 0  
PC 1.00

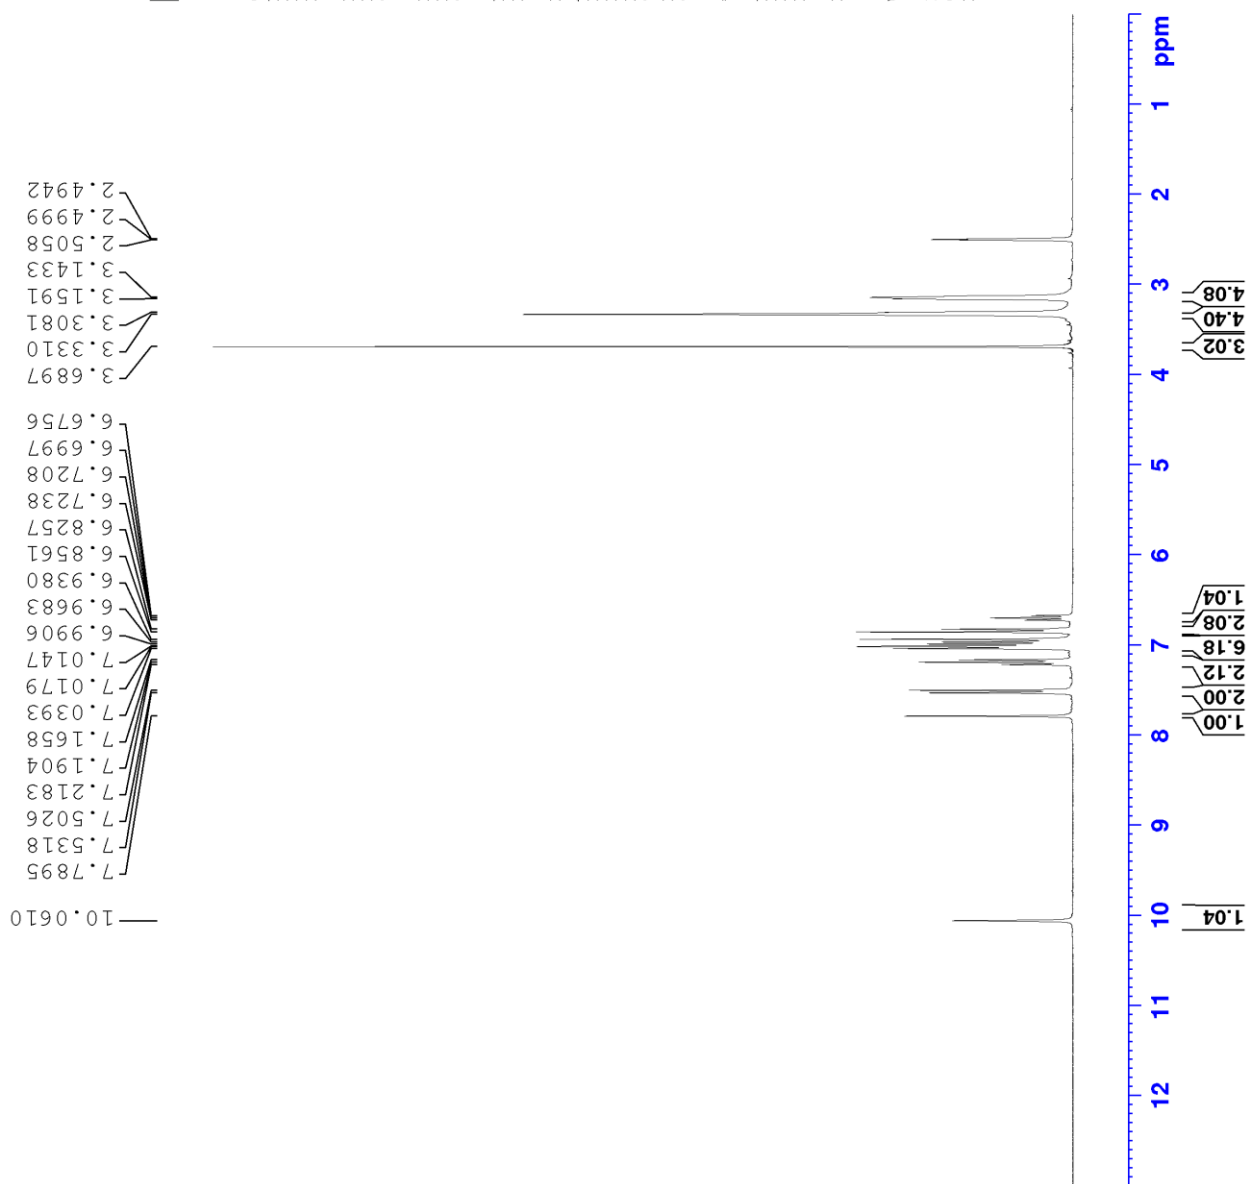

Spectra 14. <sup>1</sup>H NMR spectra of the compound 2d

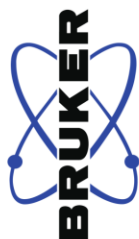

Current Data Parameters  
NAME fa  
EXPNO 481  
PROCNO 3

F2 - Acquisition Parameters

Date\_ 20160603  
Time 11.28  
INSTRUM FOURIER300  
PROBHD 5 mm DUL 13C-1  
PULPROG zgpg  
TD 32768  
SOLVENT DMSO  
NS 575  
DS 4  
SWH 24414.063 Hz  
FIDRES 0.745056 Hz  
AQ 0.6710866 sec  
RG 501.187  
DW 20.480 usec  
DE 6.50 usec  
TE 298.0 K  
D1 1.0000000 sec  
D11 0.0300000 sec  
D31 0.0001500 sec  
D32 0.8999998 sec  
D40 0.0003390 sec  
L4 23  
L5 26  
F32 90.00 usec  
TD0 1

===== CHANNEL f1 =====  
SFO1 75.4878687 MHz  
NUC1 13C  
P1 15.00 usec  
PLW1 15.0000000 W

===== CHANNEL f2 =====  
SFO2 300.1812007 MHz  
NUC2 1H  
CPDPRG2 waltz16  
PCPD2 90.00 usec  
PLW2 10.0000000 W  
PLW12 0.20863999 W  
PLW13 0.10495000 W

F2 - Processing parameters  
SI 32768  
SF 75.4803210 MHz  
WDW EM  
SSE 0  
LB 0  
GB 0  
PC 1.40

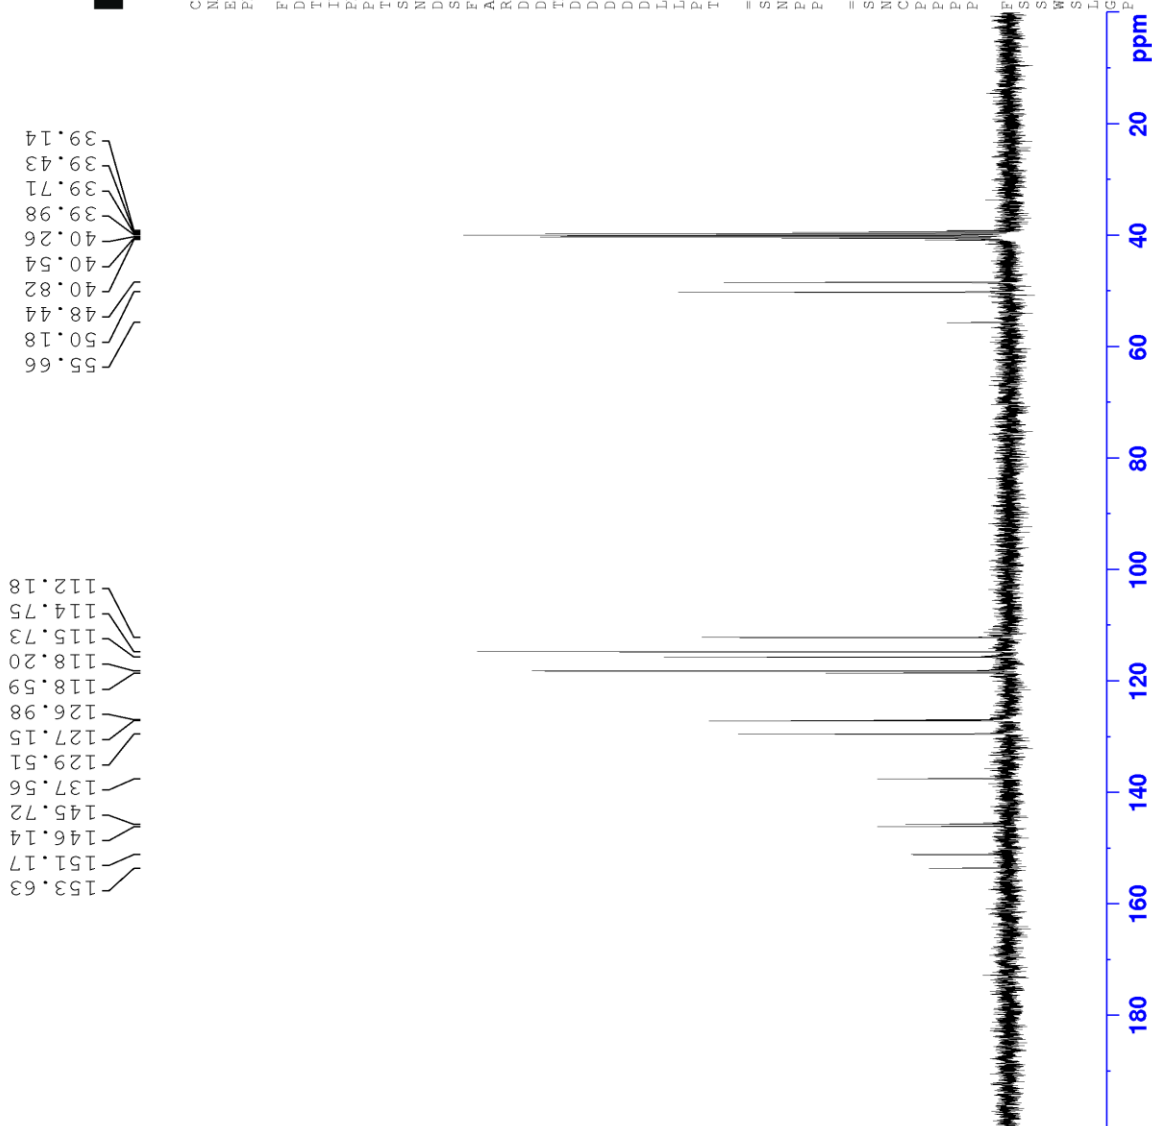

Spectra 15. <sup>13</sup>C NMR spectra of the compound 2d

Data File: C:\LabSolutions\Data\Analiz\dera\FA-4\_4.lcd

| Elmt | Val. | Min | Max | Elmt | Val. | Min | Max | Elmt | Val. | Min | Max | Use Adduct |
|------|------|-----|-----|------|------|-----|-----|------|------|-----|-----|------------|
| H    | 1    | 0   | 50  | O    | 2    | 0   | 6   | Cl   | 1    | 0   | 0   | H          |
| C    | 4    | 0   | 50  | F    | 1    | 0   | 0   | Br   | 1    | 0   | 0   |            |
| N    | 3    | 0   | 4   | S    | 2    | 0   | 0   | Pd   | 2    | 0   | 0   |            |

Error Margin (ppm): 5  
 HC Ratio: unlimited  
 Max Isotopes: 3  
 MSn Iso RI (%): 10.00

DBE Range: 10.0 - 20.0  
 Apply N Rule: yes  
 Isotope RI (%): 1.00  
 MSn Logic Mode: AND

Electron Ions: both  
 Use MSn Info: no  
 Isotope Res: 10000  
 Max Results: 500

Event#: 1 MS(E+) Ret. Time : 8.200 -> 8.200 Scan# : 1231 -> 1231

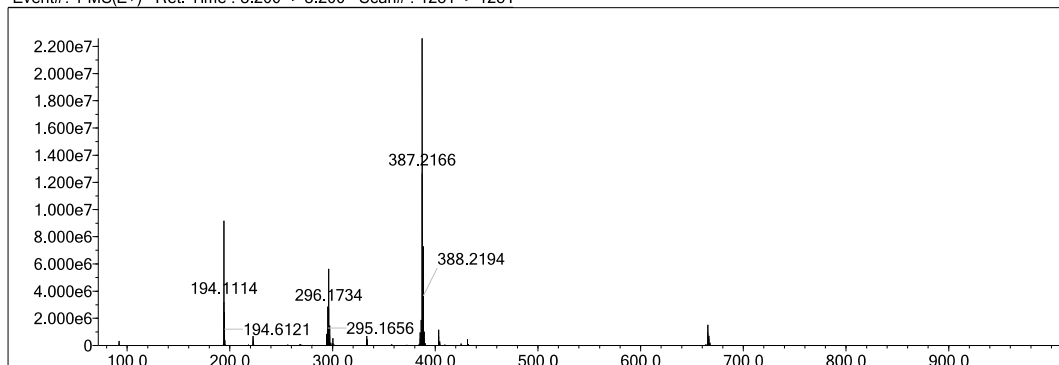

Measured region for 387.2166 m/z

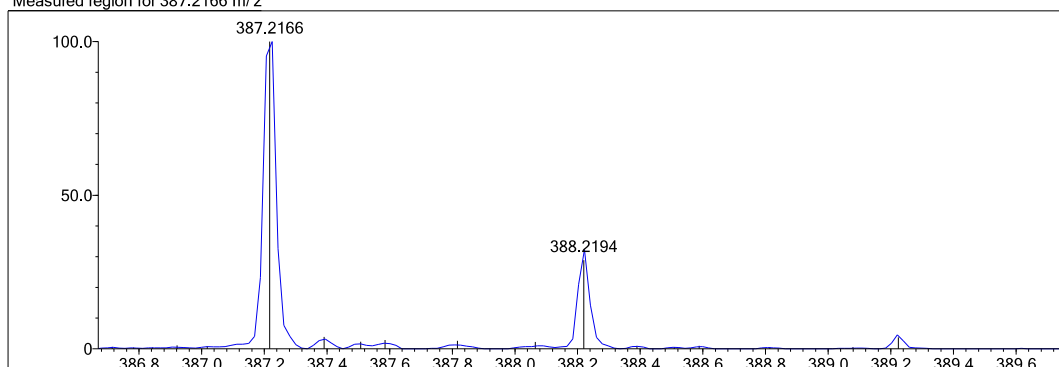

C24 H26 N4 O [M+H]<sup>+</sup> : Predicted region for 387.2179 m/z

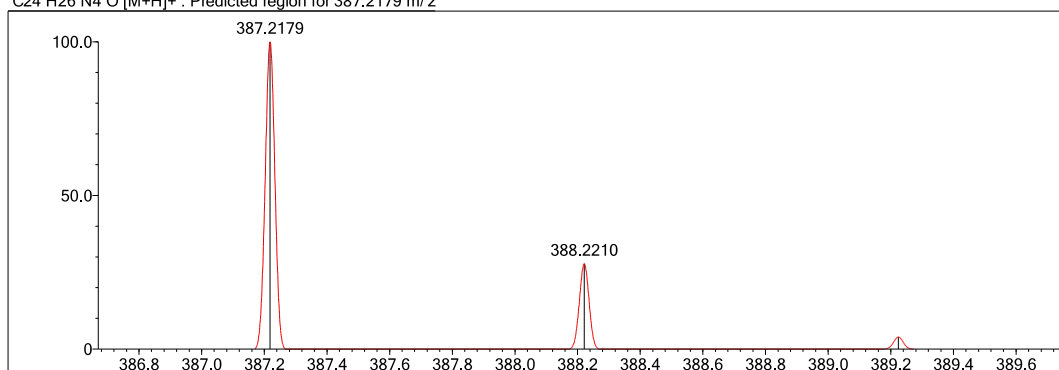

| Rank | Score | Formula (M)  | Ion                | Meas. m/z | Pred. m/z | Df. (mDa) | Df. (ppm) | Iso   | DBE  |
|------|-------|--------------|--------------------|-----------|-----------|-----------|-----------|-------|------|
| 1    | 92.48 | C24 H26 N4 O | [M+H] <sup>+</sup> | 387.2166  | 387.2179  | -1.3      | -3.36     | 98.28 | 14.0 |

**Spectra 16.** HRMS spectra of the compound 2d



## DOPNALAB

| Item               | Value                                          |
|--------------------|------------------------------------------------|
| Acquired Date&Time | 5.10.2016 10:00:28                             |
| Acquired by        | System Administrator                           |
| Filename           | C:\Users\dopnalab\Desktop\derya\faifa-2e1.jspd |
| Spectrum name      | fa-2e1                                         |
| Sample name        | fa_2e                                          |
| Sample ID          |                                                |
| Option             |                                                |
| Comment            |                                                |
| No. of Scans       | 10                                             |
| Resolution         | 4 (cm-1)                                       |
| Apodization        | Happ-Genzel                                    |

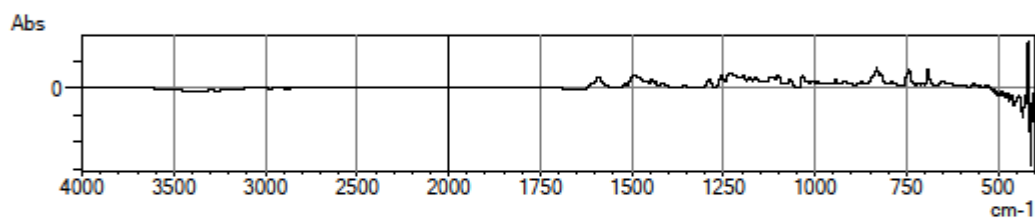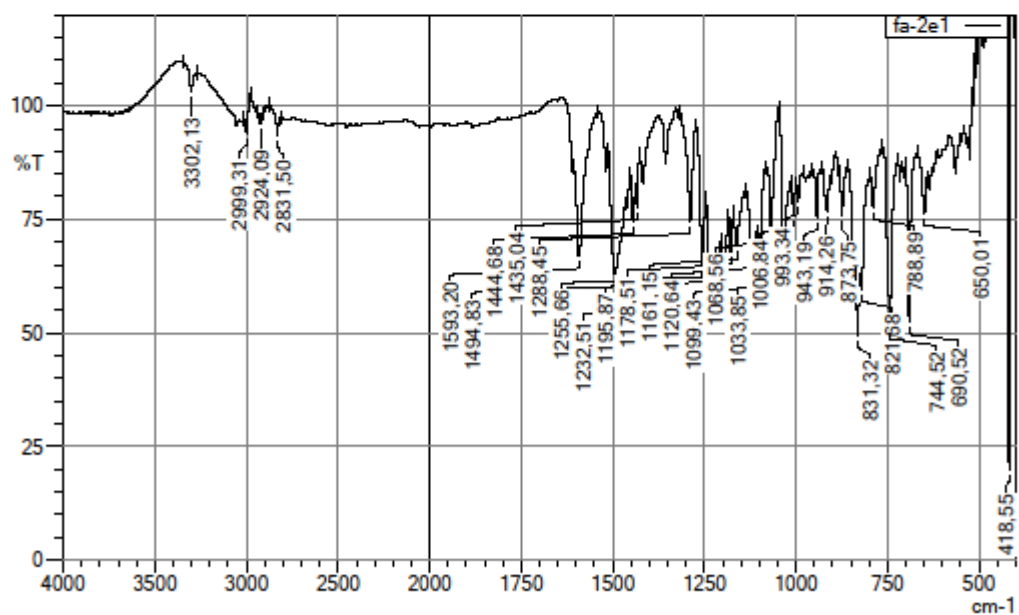

**Spectra 17.** IR spectra of the compound 2e

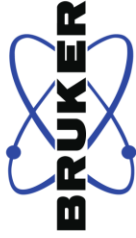

Current Data Parameters  
NAME fa  
EXPNO 462  
PROCNO 1

F2 - Acquisition Parameters  
Date\_ 20160531  
Time 20.44  
INSTRUM FOURIER300  
PROBHD 5 mm DUL 13C-1  
PULPROG zg  
TD 16384  
SOLVENT DMSO  
NS 16  
DS 0  
SWH 6103.516 Hz  
FIDRES 0.374529 Hz  
AQ 1.342173 sec  
RG 15.669  
DW 81.920 usec  
DE 6.50 usec  
TE 297.9 K  
D1 3.00000000 sec  
TD0 1

===== CHANNEL f1 =====  
SF01 300.1818537 MHz  
NUC1 1H  
P1 13.00 usec  
PLW1 10.00000000 W

F2 - Processing parameters  
SI 65536  
SF 300.1800000 MHz  
WDW EM  
SSB 0  
LB 0.30 Hz  
GB 0  
PC 1.00

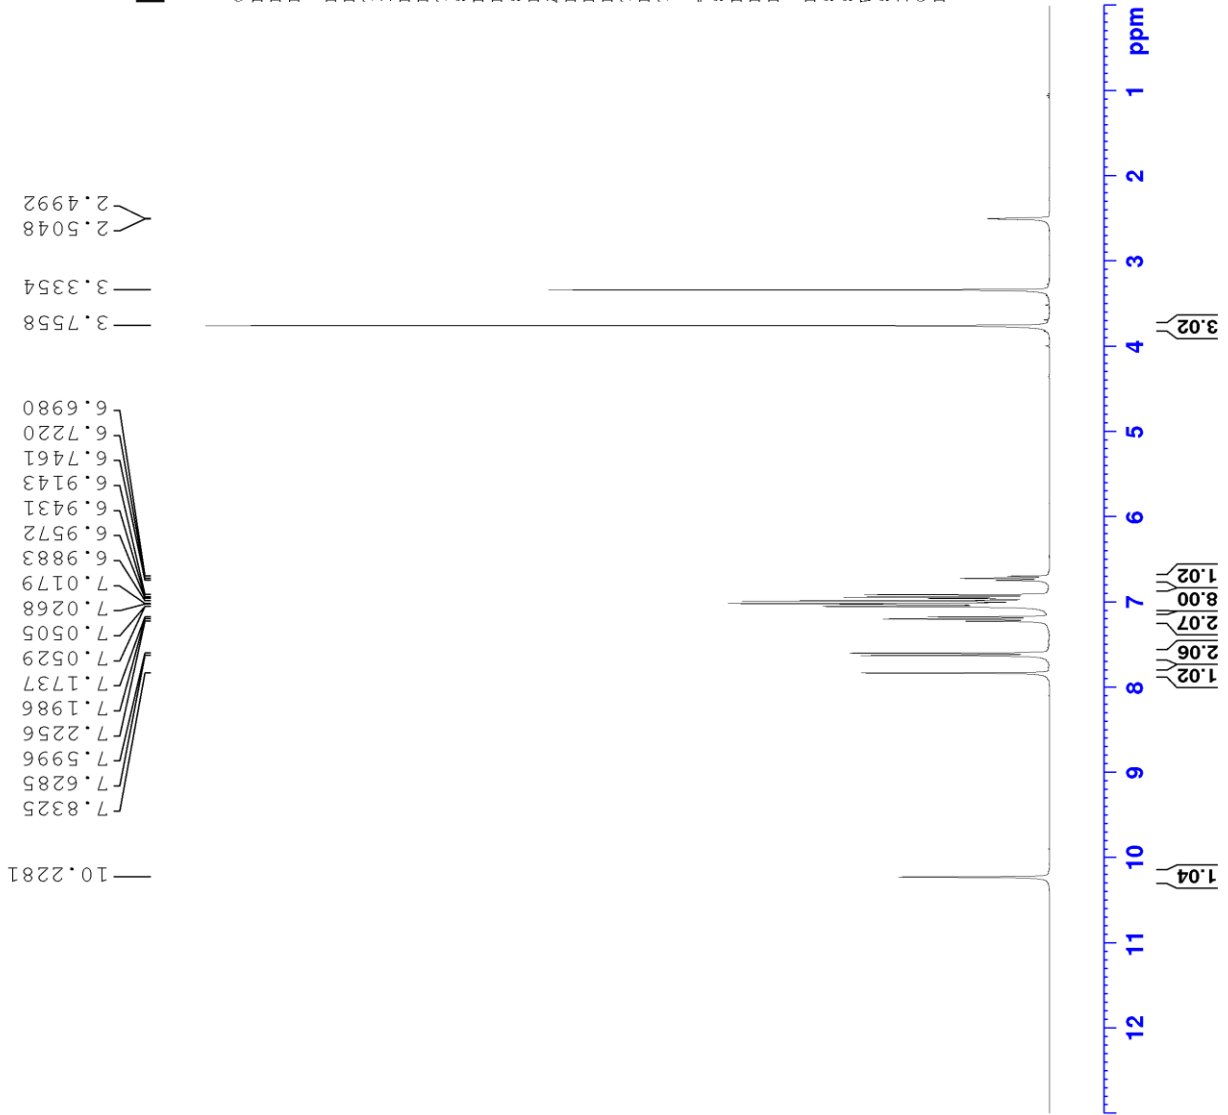

Spectra 18. <sup>1</sup>H NMR spectra of the compound 2e

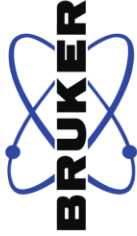

Current Data Parameters  
NAME fa  
EXPNO 463  
PROCNO 1

F2 - Acquisition Parameters

Date\_ 20160531  
Time 20.46  
INSTRUM FOURIER300  
PROBHD 5 mm DUL 13C-1  
PULPROG zgpg  
TD 32768  
SOLVENT DMSO  
NS 2048  
DS 4  
SMH 24414.063 Hz  
FIDRES 0.745058 Hz  
AQ 0.6710886 sec  
RG 501.167  
DW 20.480 usec  
DE 6.50 usec  
TE 298.1 K  
D1 1.00000000 sec  
D11 0.03000000 sec  
D31 0.00001500 sec  
D32 0.89999998 sec  
D40 0.00093990 sec  
L4 23  
L5 26  
F2 90.00 usec  
TD0 1

==== CHANNEL f1 =====  
SF01 75.4878687 MHz  
NUC1 13C  
P1 15.00 usec  
PLW1 15.0000000 W

==== CHANNEL f2 =====  
SF02 300.1812007 MHz  
NUC2 1H  
CPDPRG[2] waltz16  
PCPD2 90.00 usec  
PLW2 10.0000000 W  
PLW12 0.2086399 W  
PLW13 0.10495000 W

F2 - Processing parameters

SI 32768  
SF 75.4803210 MHz  
WDW EM  
SSB 0  
LB 1.00 Hz  
GB 0  
FC 1.40

55.89  
40.81  
40.54  
40.26  
39.98  
39.70  
39.42  
39.15

158.40  
156.22  
149.60  
145.87  
136.49  
130.89  
129.54  
127.67  
121.29  
118.98  
117.87  
115.58  
112.33

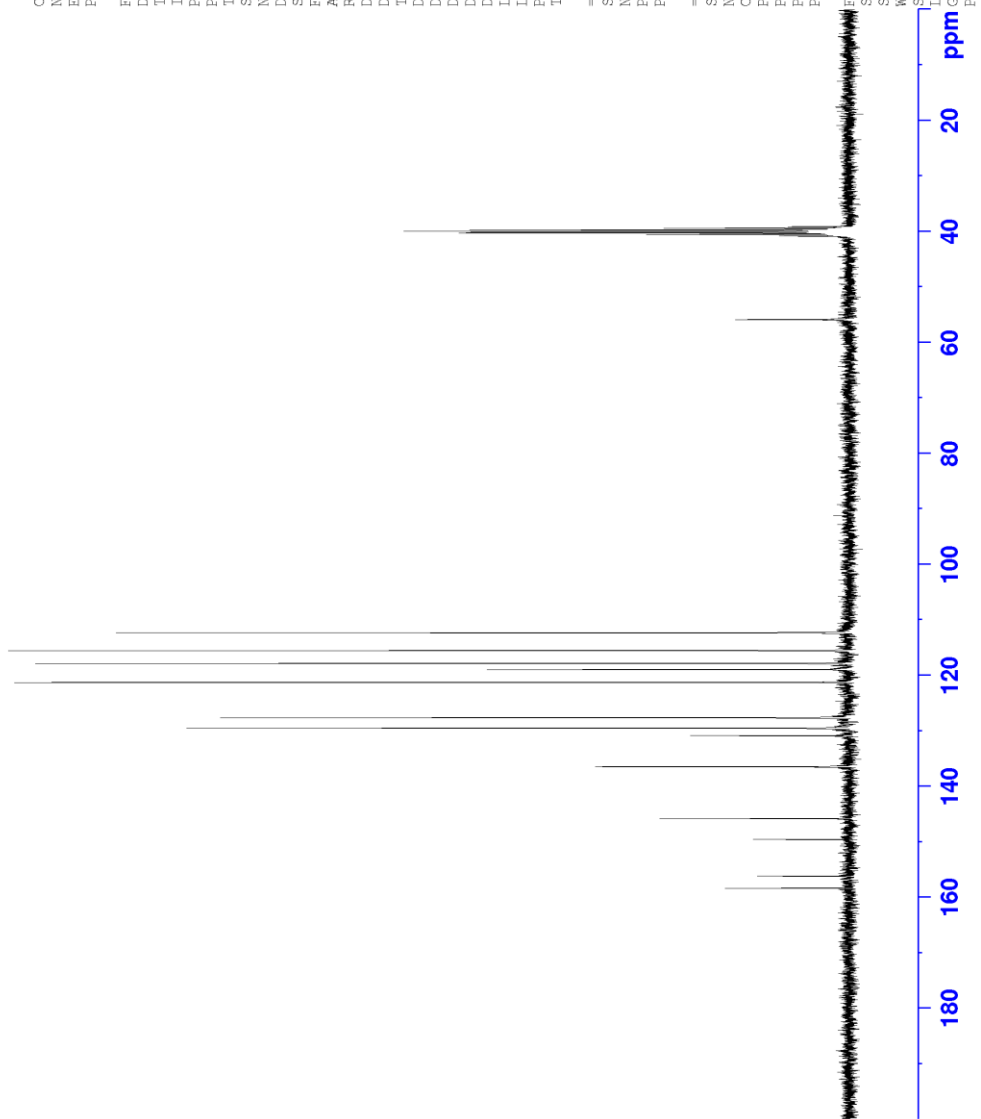

Spectra 19. <sup>13</sup>C NMR spectra of the compound 2e

Data File: C:\LabSolutions\Data\Analiz\derya\FA-5\_5.lcd

| Elmt | Val. | Min | Max | Elmt | Val. | Min | Max | Elmt | Val. | Min | Max | Use Adduct |
|------|------|-----|-----|------|------|-----|-----|------|------|-----|-----|------------|
| H    | 1    | 0   | 50  | O    | 2    | 0   | 6   | Cl   | 1    | 0   | 0   | H          |
| C    | 4    | 0   | 50  | F    | 1    | 0   | 0   | Br   | 1    | 0   | 0   |            |
| N    | 3    | 0   | 4   | S    | 2    | 0   | 0   | Pd   | 2    | 0   | 0   |            |

Error Margin (ppm): 5  
 HC Ratio: unlimited  
 Max Isotopes: 3  
 MSn Iso RI (%): 10.00

DBE Range: 10.0 - 20.0  
 Apply N Rule: yes  
 Isotope RI (%): 1.00  
 MSn Logic Mode: AND

Electron Ions: both  
 Use MSn Info: no  
 Isotope Res: 10000  
 Max Results: 500

Event#: 1 MS(E+) Ret. Time : 8.867 -> 8.867 Scan#: 1331 -> 1331

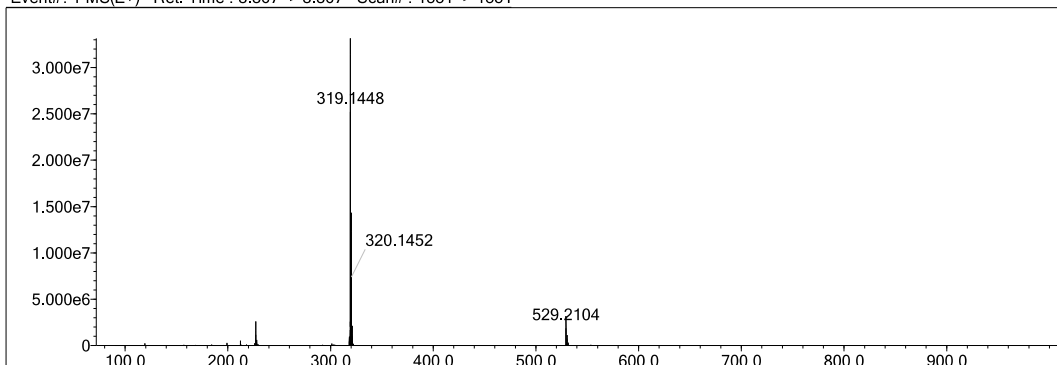

Measured region for 319.1448 m/z

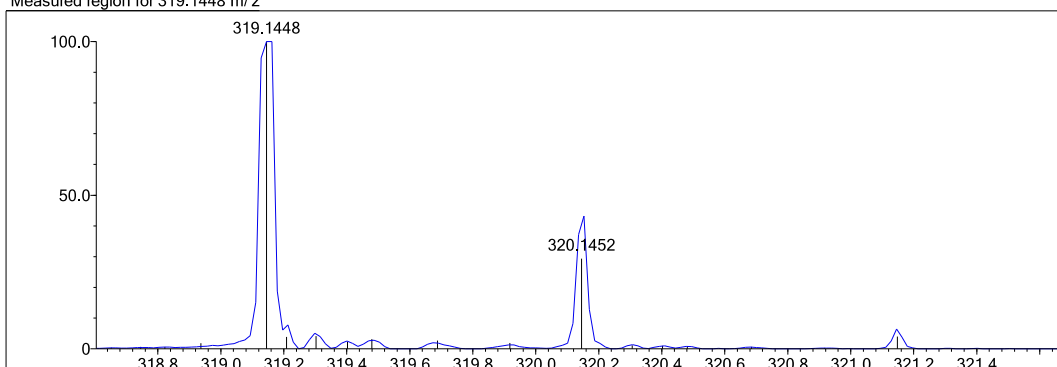

C20 H18 N2 O2 [M+H]+ : Predicted region for 319.1441 m/z

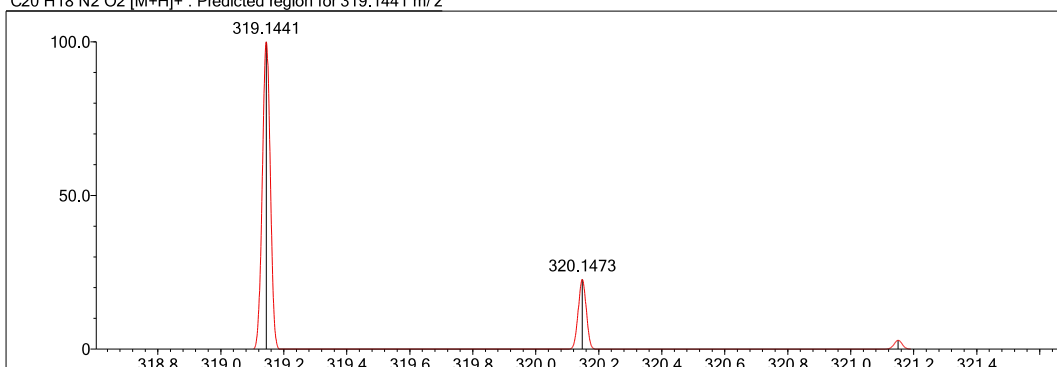

| Rank | Score | Formula (M)   | Ion    | Meas. m/z | Pred. m/z | Df. (mDa) | Df. (ppm) | Iso   | DBE  |
|------|-------|---------------|--------|-----------|-----------|-----------|-----------|-------|------|
| 1    | 59.52 | C20 H18 N2 O2 | [M+H]+ | 319.1448  | 319.1441  | 0.7       | 2.19      | 61.35 | 13.0 |

**Spectra 20.** HRMS spectra of the compound 2e

## DOPNALAB

| Item               | Value                                          |
|--------------------|------------------------------------------------|
| Acquired Date&Time | 5.10.2016 10:03:22                             |
| Acquired by        | System Administrator                           |
| Filename           | C:\Users\dopnalab\Desktop\derya\fa\fa-2f1.ispd |
| Spectrum name      | fa-2f1                                         |
| Sample name        | fa_2f                                          |
| Sample ID          |                                                |
| Option             |                                                |
| Comment            |                                                |
| No. of Scans       | 10                                             |
| Resolution         | 4 [cm-1]                                       |
| Apodization        | Happ-Genzel                                    |

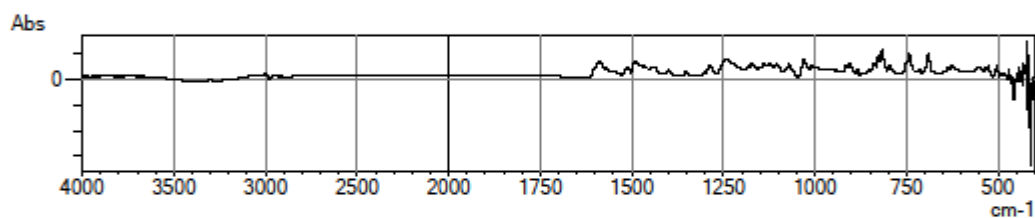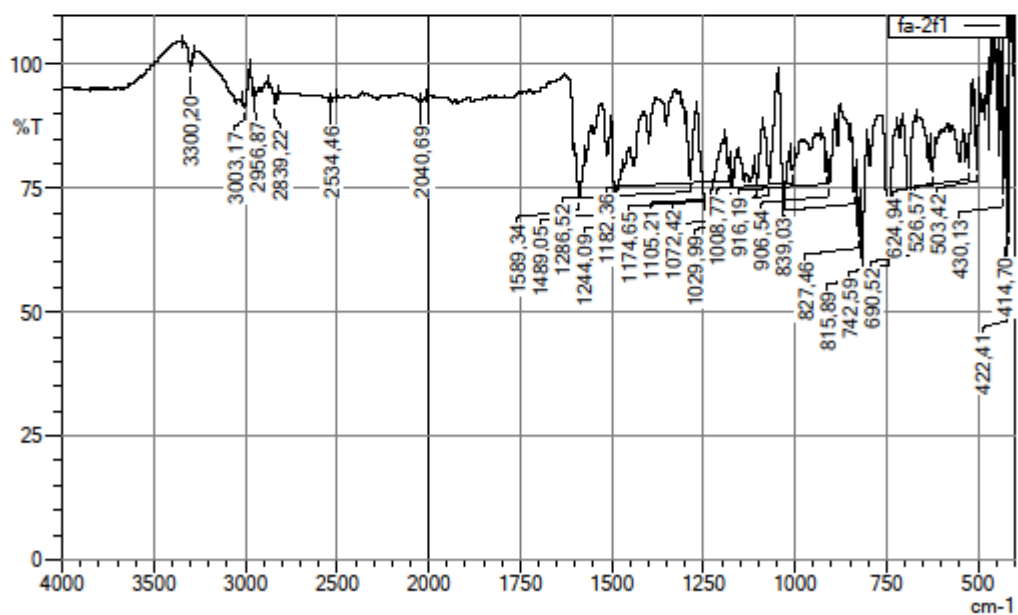

**Spectra 21.** IR spectra of the compound 2f

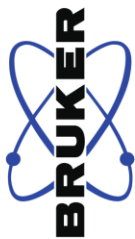

Current Data Parameters  
NAME fa  
EXPNO 464  
PROCNO 1

F2 - Acquisition Parameters  
Date\_ 20160531  
Time 21.46  
INSTRUM FOURIER300  
PROBHD 5 mm DUL 13C-1  
PULPROG zg  
TD 16384  
SOLVENT DMSO  
NS 16  
DS 0  
SWH 6103.516 Hz  
FIDRES 0.378529 Hz  
AQ 1.3421773 sec  
RG 17.237  
DW 81.920 usec  
DE 6.50 usec  
TE 298.1 K  
D1 3.00000000 sec  
TD0 1

==== CHANNEL f1 =====  
SFO1 300.1818537 MHz  
NUC1 1H  
P1 13.00 usec  
PLW1 10.0000000 W

F2 - Processing parameters  
SI 65536  
SF 300.1800000 MHz  
WDW EM  
SSB 0  
LB 0.30 Hz  
GB 0  
PC 1.00

2.4938  
2.4999  
2.5060  
3.3335  
3.7875  
6.7113  
6.7354  
6.7596  
6.9927  
7.0033  
7.0106  
7.0272  
7.0435  
7.0561  
7.0598  
7.1181  
7.1462  
7.1762  
7.2006  
7.2289  
7.4123  
7.4418  
7.5466  
7.5748  
7.7953  
10.3333

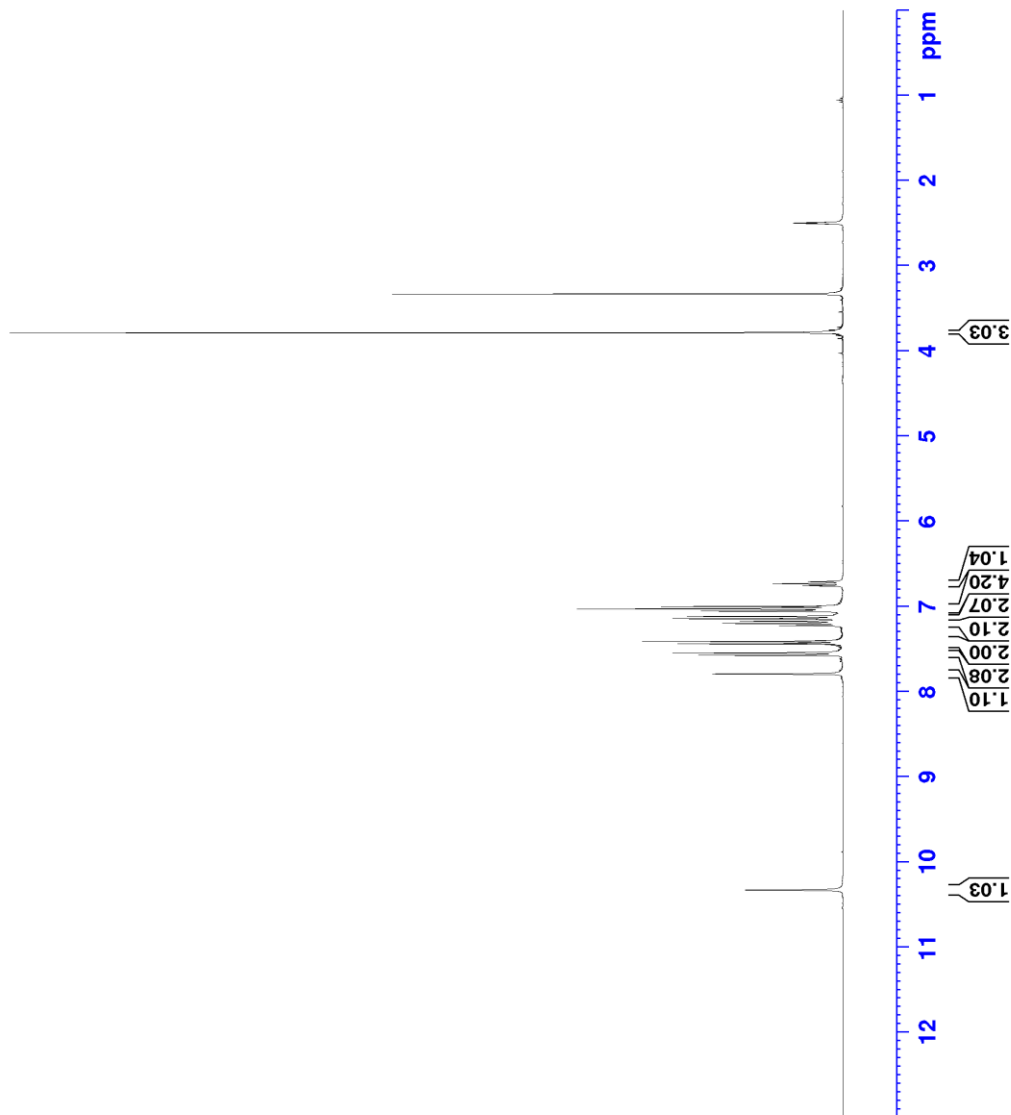

Spectra 22. <sup>1</sup>H NMR spectra of the compound 2f

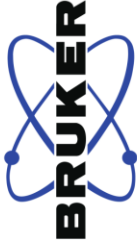

Current Data Parameters  
NAME fa  
EXPNO 465  
PROCNO 1

F2 - Acquisition Parameters  
Date\_ 20160531  
Time 21.48  
INSTRUM FOURIER300  
PROBHD 5 mm DUL 13C-1  
PULPROG zgpg  
TD 32768  
SOLVENT DMSO  
NS 2048  
DS 4  
SWH 24414.063 Hz  
FIDRES 0.745058 Hz  
AQ 0.6710886 sec  
RG 501.187  
DW 20.480 usec  
DE 6.50 usec  
TE 298.0 K  
D1 1.0000000 sec  
D11 0.0300000 sec  
D31 0.0001500 sec  
D32 0.8999998 sec  
D40 0.00093990 sec  
L4 23  
L5 26  
P32 90.00 usec  
TD0 1

==== CHANNEL f1 =====  
SFO1 75.4878687 MHz  
NUC1 13C  
P1 15.00 usec  
PLW1 15.0000000 W

==== CHANNEL f2 =====  
SFO2 300.1812007 MHz  
NUC2 1H  
CPDPRG[2] waltz16  
PCPD2 90.00 usec  
PLW2 10.0000000 W  
PLW12 0.20863899 W  
PLW13 0.10495000 W

F2 - Processing parameters  
SI 32768  
SF 75.4803210 MHz  
EM  
WDW 0  
SSB 0  
LB 1.00 Hz  
GB 0  
PC 1.40

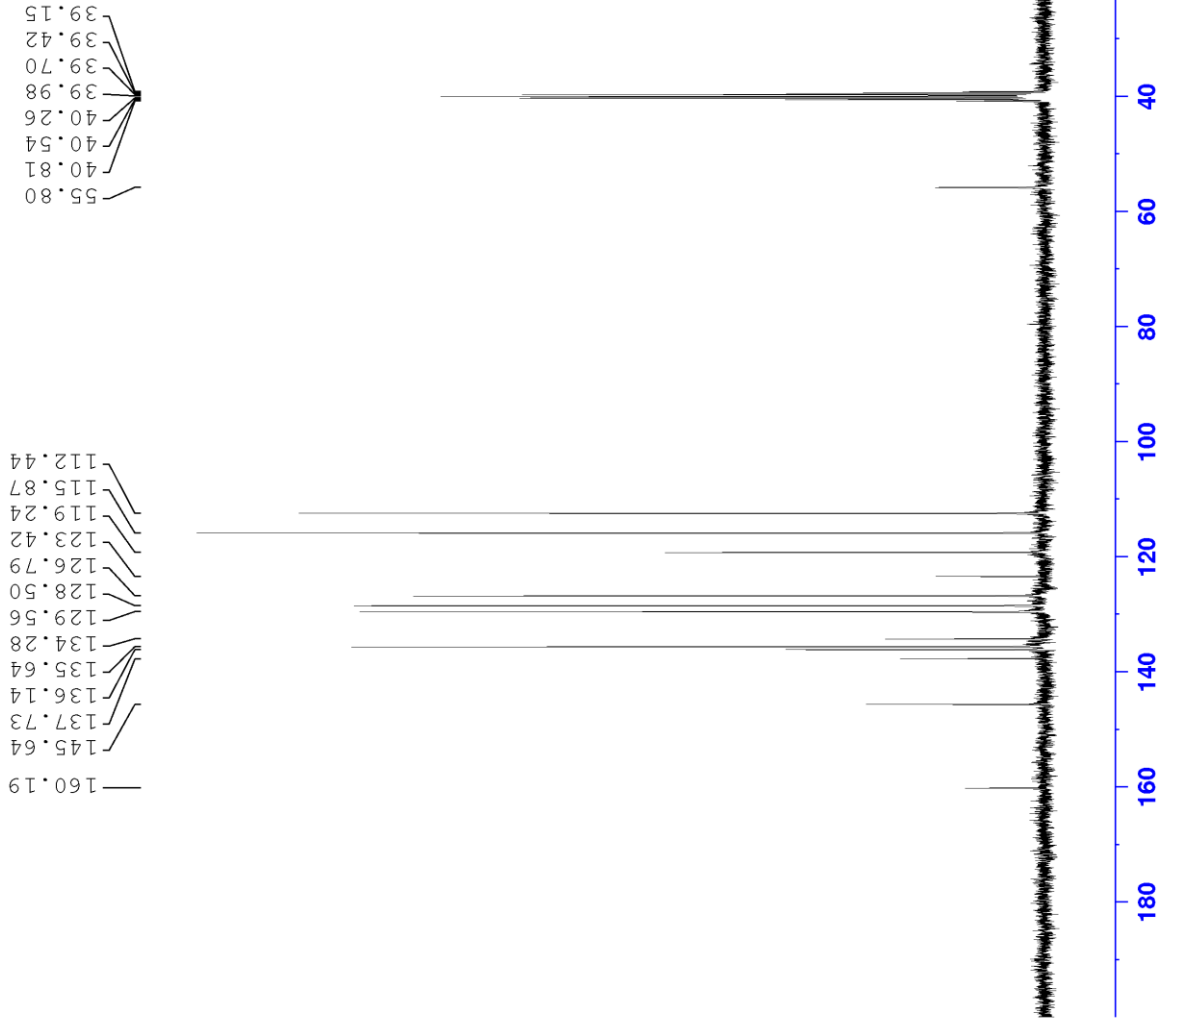

Spectra 23. <sup>13</sup>C NMR spectra of the compound 2f

Data File: C:\LabSolutions\Data\Analiz\derya\FA-6\_6.lcd

| Elmt | Val. | Min | Max | Elmt | Val. | Min | Max | Elmt | Val. | Min | Max | Use Adduct |
|------|------|-----|-----|------|------|-----|-----|------|------|-----|-----|------------|
| H    | 1    | 0   | 50  | O    | 2    | 0   | 6   | Cl   | 1    | 0   | 0   | H          |
| C    | 4    | 0   | 50  | F    | 1    | 0   | 0   | Br   | 1    | 0   | 0   |            |
| N    | 3    | 0   | 4   | S    | 2    | 0   | 1   | Pd   | 2    | 0   | 0   |            |

Error Margin (ppm): 5  
 HC Ratio: unlimited  
 Max Isotopes: 3  
 MSn Iso RI (%): 10.00

DBE Range: 10.0 - 20.0  
 Apply N Rule: yes  
 Isotope RI (%): 1.00  
 MSn Logic Mode: AND

Electron Ions: both  
 Use MSn Info: no  
 Isotope Res: 10000  
 Max Results: 500

Event#: 1 MS(E+) Ret. Time : 9.440 -> 9.440 Scan#: 1417 -> 1417

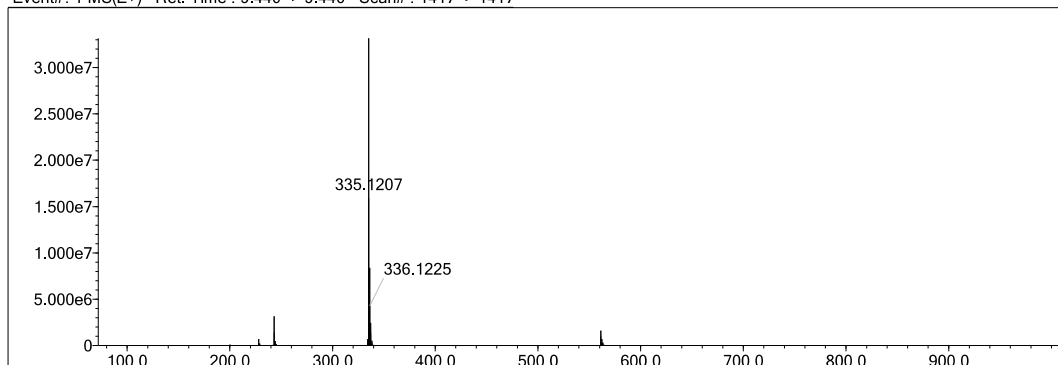

Measured region for 335.1207 m/z

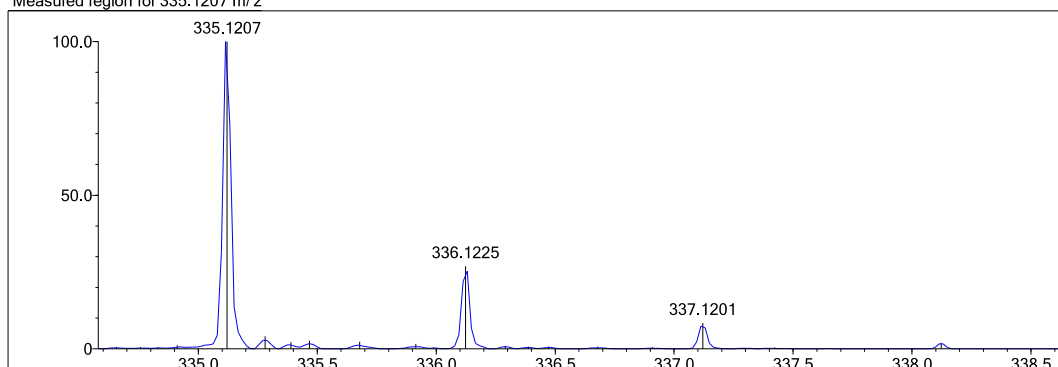

C20 H18 N2 O S [M+H]<sup>+</sup> : Predicted region for 335.1213 m/z

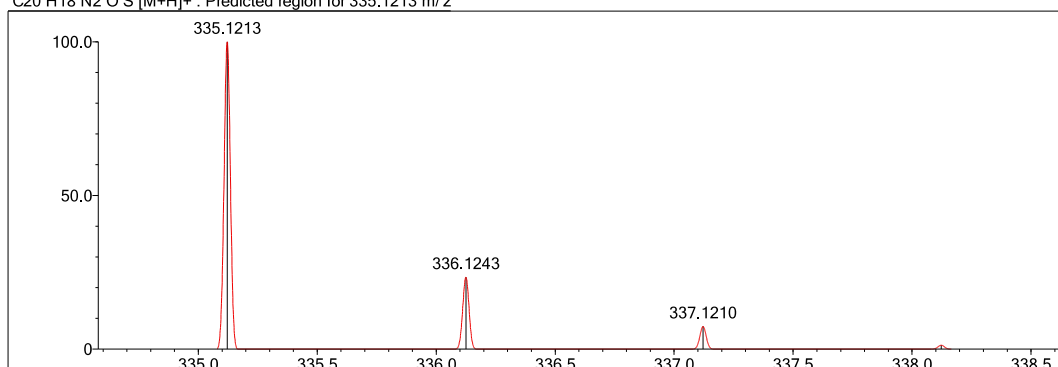

| Rank | Score | Formula (M)    | Ion                | Meas. m/z | Pred. m/z | Df. (mDa) | Df. (ppm) | Iso   | DBE  |
|------|-------|----------------|--------------------|-----------|-----------|-----------|-----------|-------|------|
| 1    | 77.61 | C20 H18 N2 O S | [M+H] <sup>+</sup> | 335.1207  | 335.1213  | -0.6      | -1.79     | 79.17 | 13.0 |

Spectra 24. HRMS spectra of the compound 2f



## DOPNALAB

| Item               | Value                                          |
|--------------------|------------------------------------------------|
| Acquired Date&Time | 5.10.2016 10:06:35                             |
| Acquired by        | System Administrator                           |
| Filename           | C:\Users\dopnalab\Desktop\derya\faifa-2g1.jspd |
| Spectrum name      | fa-2g1                                         |
| Sample name        | fa_2g                                          |
| Sample ID          |                                                |
| Option             |                                                |
| Comment            |                                                |
| No. of Scans       | 10                                             |
| Resolution         | 4 (cm-1)                                       |
| Apodization        | Happ-Genzel                                    |

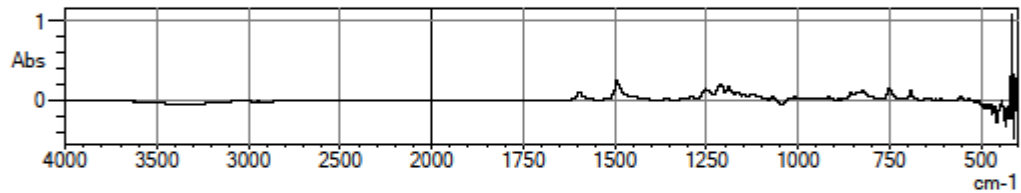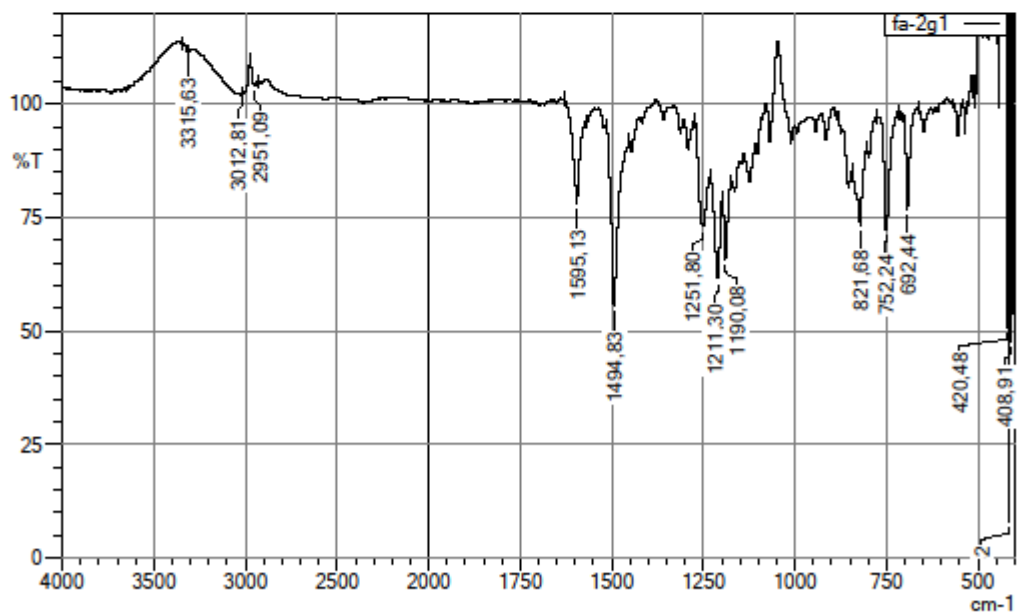

Spectra 25. IR spectra of the compound 2g

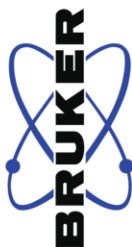

Current Data Parameters  
NAME fa  
EXPNO 466  
PROCNO 1

F2 - Acquisition Parameters  
Date\_ 20160531  
Time 22.48  
INSTRUM FOURIER300  
PROBHD 5 mm DUL 13C-1  
PULPROG zg  
TD 16384  
SOLVENT DMSO  
NS 16  
DS 0  
SWH 6103.516 Hz  
FIDRES 0.372529 Hz  
AQ 1.342173 sec  
RG 12.5432  
DW 81.920 usec  
DE 6.50 usec  
TE 298.0 K  
D1 3.00000000 sec  
TD0 1

==== CHANNEL f1 =====  
SF01 300.1618537 MHz  
NUC1 1H  
P1 13.00 usec  
PLW1 10.00000000 W

F2 - Processing parameters  
SI 65536  
SF 300.1800000 MHz  
WDW EM  
SSB 0  
LB 0.30 Hz  
GB 0  
PC 1.00

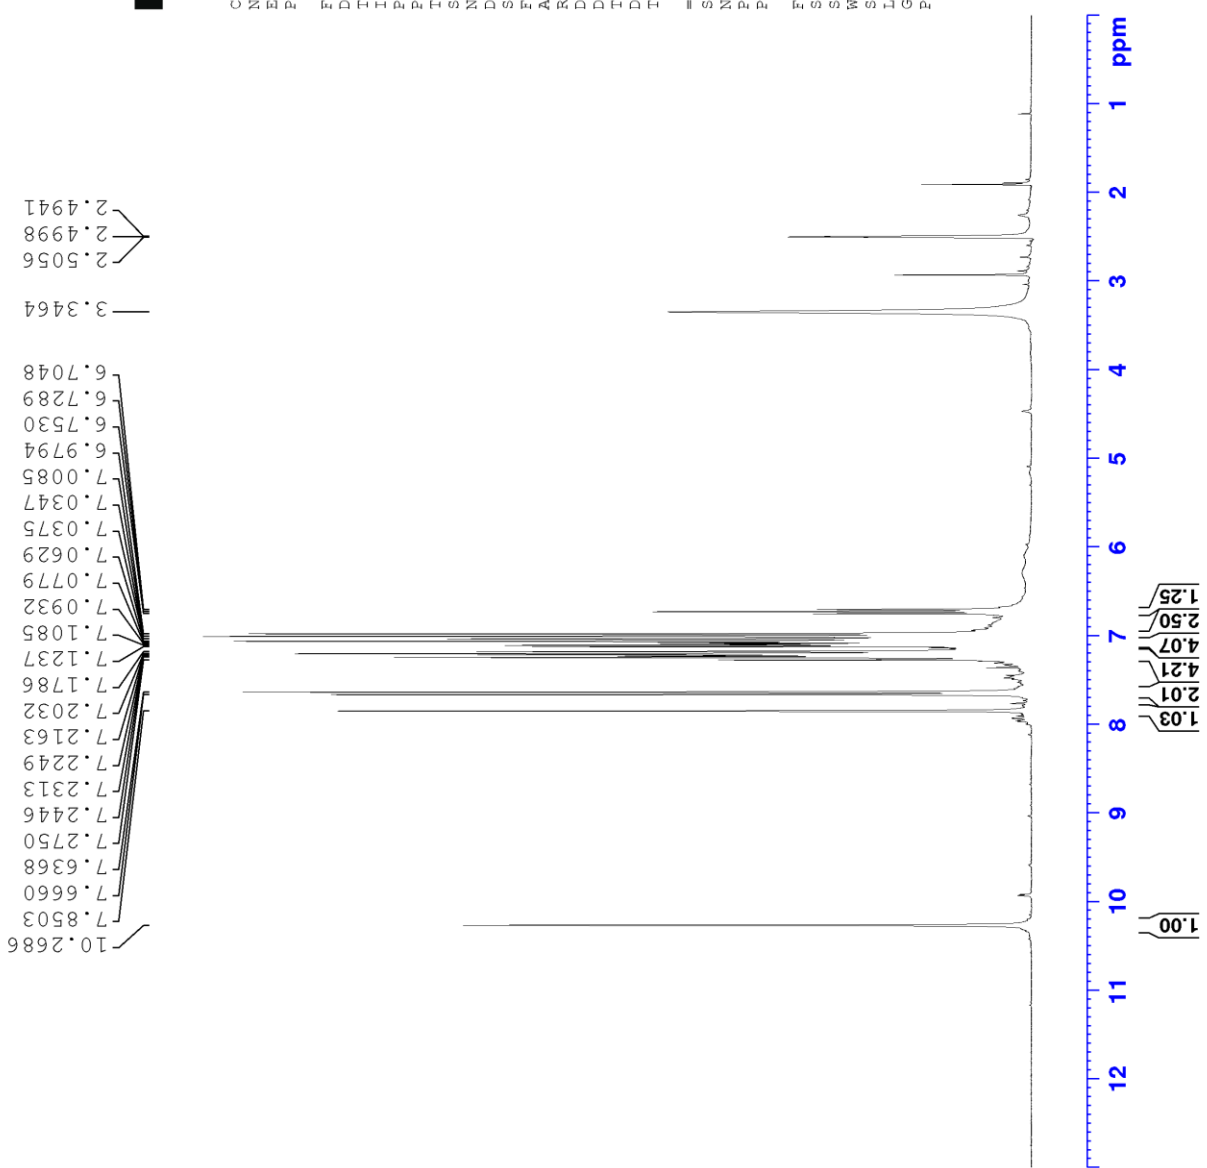

Spectra 26. <sup>1</sup>H NMR spectra of the compound 2g

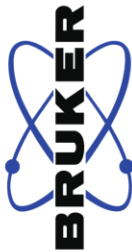

Current Data Parameters  
NAME Ia  
EXPNO 467  
PROCNO 1

F2 - Acquisition Parameters

Date\_ 20160531  
Time 22.50  
INSTRUM FOURIER300  
PROBHD 5 mm DUL 13C-1  
PULPROG zgpg  
TD 32768  
SOLVENT DMSO  
NS 2048  
DS 4  
SWH 24414.063 Hz  
FIDRES 0.745056 Hz  
AQ 0.6710886 sec  
RG 501.187  
DW 20.480 usec  
DE 6.50 usec  
TE 298.0 K  
D1 1.00000000 sec  
D11 0.03000000 sec  
D31 0.00001500 sec  
D32 0.89999998 sec  
D40 0.00003990 sec  
L4 23  
L5 26  
L6 26  
P32 90.00 usec  
TDO 1

==== CHANNEL f1 =====  
SFO1 75.4878687 MHz  
NUC1 13C  
P1 15.00 usec  
PLW1 15.00000000 W

==== CHANNEL f2 =====  
SFO2 300.1812007 MHz  
NUC2 1H  
CPDPRG[2] waltz16  
PCPD2 90.00 usec  
PLW2 10.00000000 W  
PLW12 0.20863999 W  
PLW13 0.10495000 W

F2 - Processing parameters  
SI 32768  
SF 75.4803210 MHz  
WDW EM  
SSB 0  
GB 0  
PC 1.40

40.81  
40.53  
40.25  
39.97  
39.70  
39.42  
39.14

160.37  
157.42  
157.19  
152.82  
145.82  
136.30  
131.62  
129.55  
127.76  
121.34  
121.22  
119.05  
118.70  
117.25  
116.94  
112.36

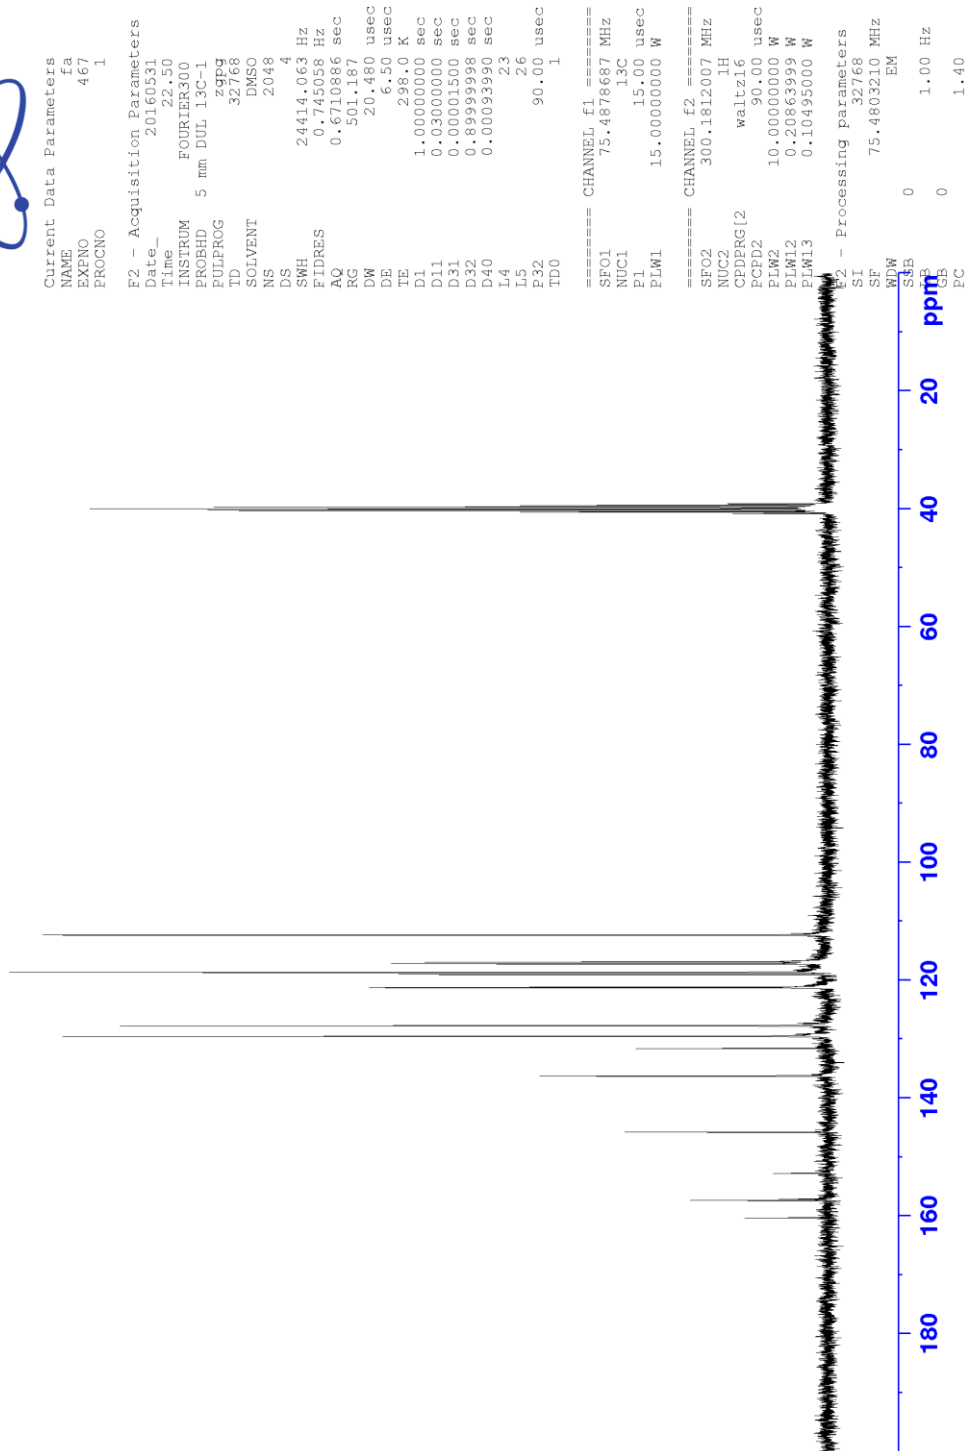

Spectra 27. <sup>13</sup>C NMR spectra of the compound 2g

Data File: C:\LabSolutions\Data\Analiz\derya\FA-7\_7.lcd

| Elmt | Val. | Min | Max | Elmt | Val. | Min | Max | Elmt | Val. | Min | Max | Use Adduct |
|------|------|-----|-----|------|------|-----|-----|------|------|-----|-----|------------|
| H    | 1    | 0   | 50  | O    | 2    | 0   | 6   | Cl   | 1    | 0   | 0   | H          |
| C    | 4    | 0   | 50  | F    | 1    | 1   | 1   | Br   | 1    | 0   | 0   |            |
| N    | 3    | 0   | 4   | S    | 2    | 0   | 1   | Pd   | 2    | 0   | 0   |            |

Error Margin (ppm): 5  
 HC Ratio: unlimited  
 Max Isotopes: 3  
 MSn Iso RI (%): 10.00

DBE Range: 10.0 - 20.0  
 Apply N Rule: yes  
 Isotope RI (%): 1.00  
 MSn Logic Mode: AND

Electron Ions: both  
 Use MSn Info: no  
 Isotope Res: 10000  
 Max Results: 500

Event#: 1 MS(E+) Ret. Time : 9.000 -> 9.000 Scan#: 1351 -> 1351

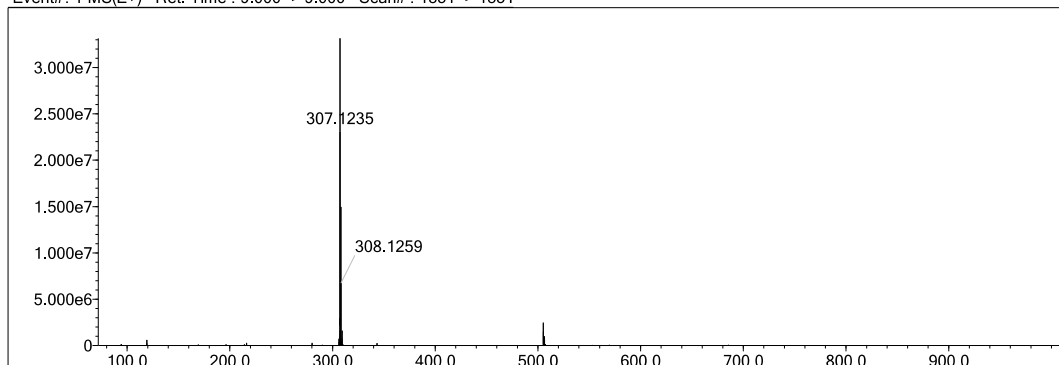

Measured region for 307.1235 m/z

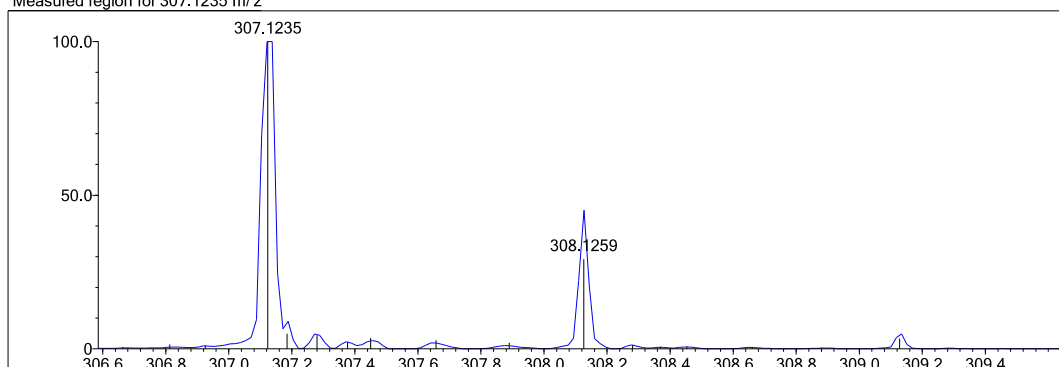

C19 H15 N2 O F [M+H]<sup>+</sup> : Predicted region for 307.1241 m/z

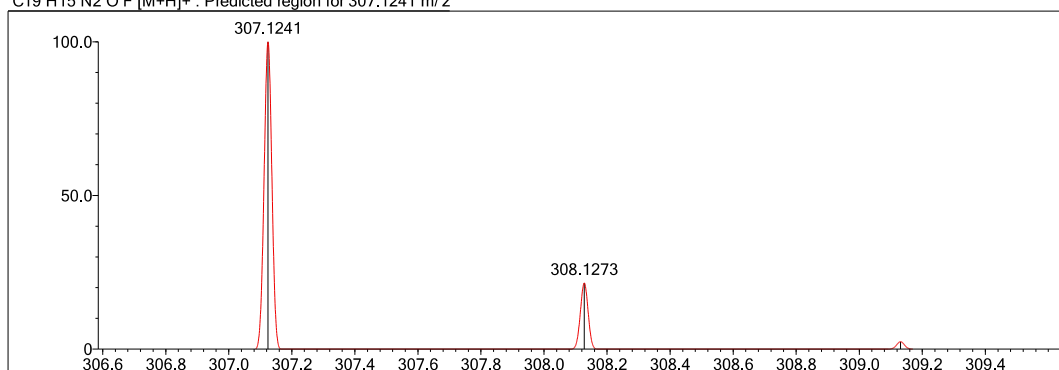

| Rank | Score | Formula (M)    | Ion                | Meas. m/z | Pred. m/z | Df. (mDa) | Df. (ppm) | Iso   | DBE  |
|------|-------|----------------|--------------------|-----------|-----------|-----------|-----------|-------|------|
| 1    | 59.86 | C19 H15 N2 O F | [M+H] <sup>+</sup> | 307.1235  | 307.1241  | -0.6      | -1.95     | 61.32 | 13.0 |

**Spectra 28.** HRMS spectra of the compound 2g

## DOPNALAB

| Item               | Value                                          |
|--------------------|------------------------------------------------|
| Acquired Date&Time | 5.10.2016 10:09:19                             |
| Acquired by        | System Administrator                           |
| Filename           | C:\Users\dopnalab\Desktop\derya\faifa-2h1.jspd |
| Spectrum name      | fa-2h1                                         |
| Sample name        | fa_2h                                          |
| Sample ID          |                                                |
| Option             |                                                |
| Comment            |                                                |
| No. of Scans       | 10                                             |
| Resolution         | 4 (cm-1)                                       |
| Apodization        | Happ-Genzel                                    |

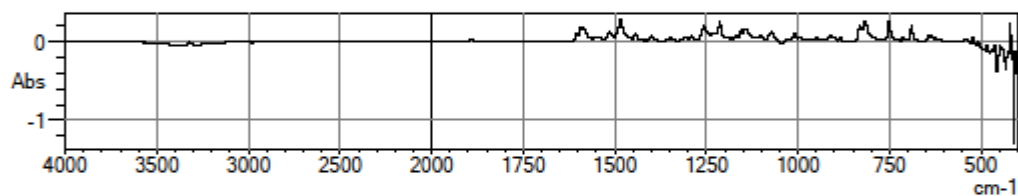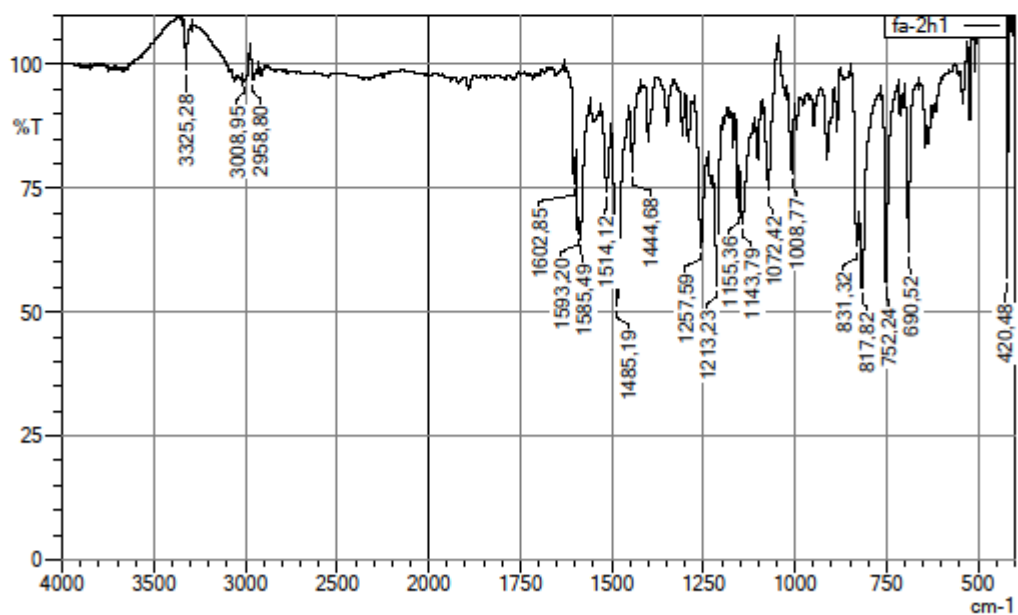

Spectra 29. IR spectra of the compound 2h

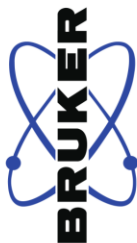

Current Data Parameters  
NAME fa  
EXPNO 468  
PROCNO 1

F2 - Acquisition Parameters  
Date\_ 20160531  
Time 23.50  
INSTRUM FOURIER300  
PROBHD 5 mm DUL 13C-1  
PULPROG zg  
TD 16384  
SOLVENT DMSO  
NS 16  
DS 0  
SWH 6103.516 Hz  
FIDRES 0.372529 Hz  
AQ 1.342173 sec  
RG 43.5994  
DW 81.920 usec  
DE 6.50 usec  
TE 297.9 K  
D1 3.00000000 sec  
TD0 1

===== CHANNEL f1 =====  
SFO1 300.1818537 MHz  
NUC1 1H  
P1 13.00 usec  
PLW1 10.00000000 W

F2 - Processing parameters  
SI 65536  
SF 300.1800000 MHz  
WDW EM  
SSB 0  
LB 0.30 Hz  
GB 0  
PC 1.00

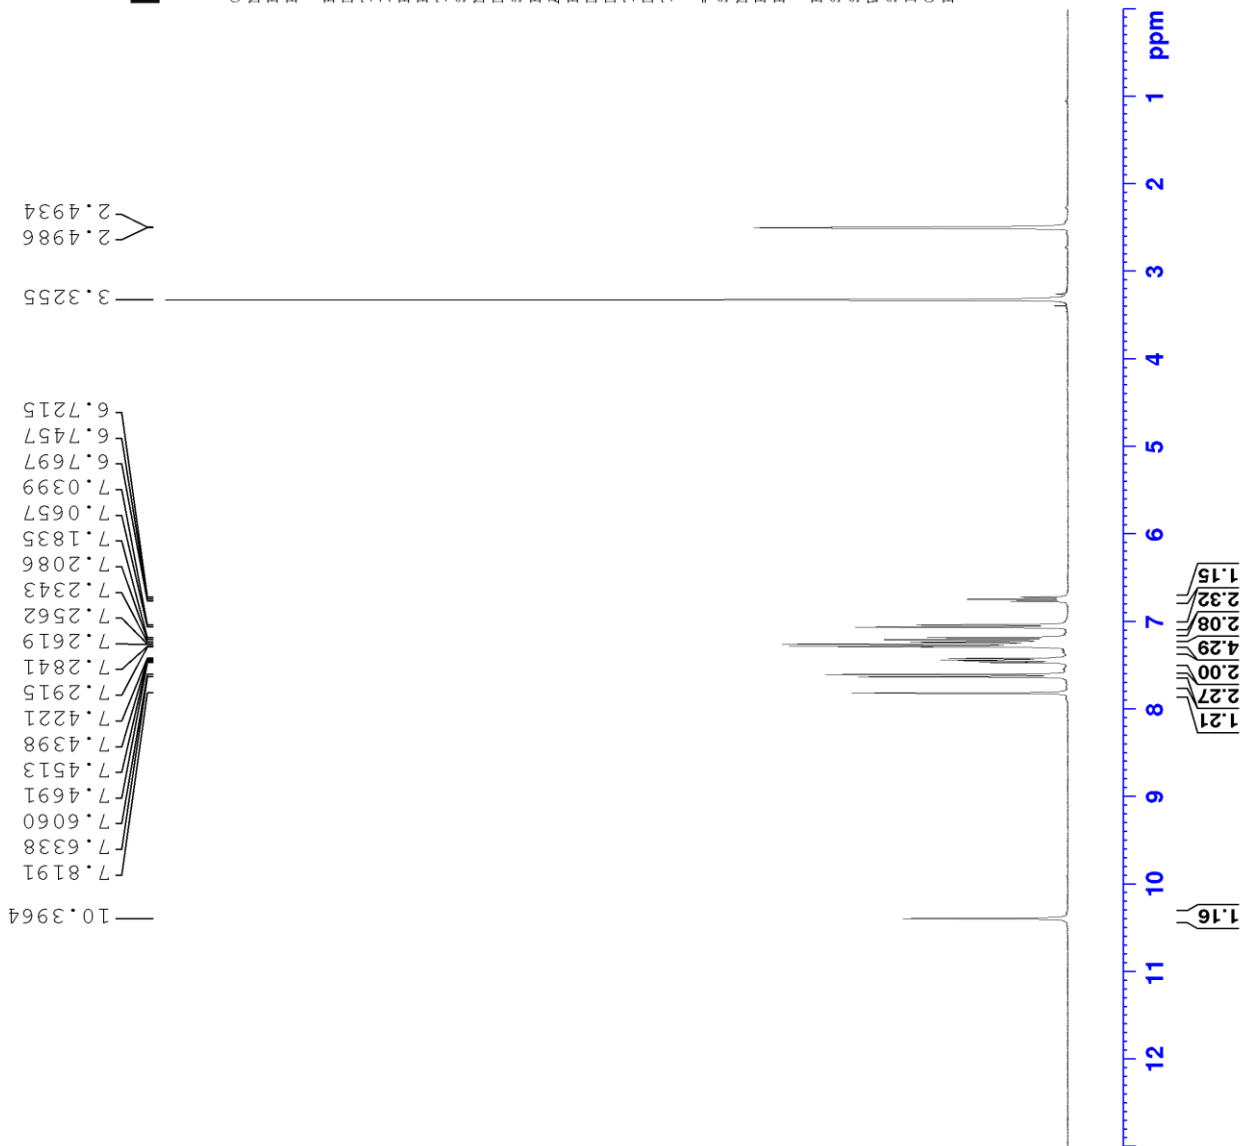

Spectra 30. <sup>1</sup>H NMR spectra of the compound 2h

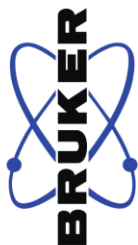

Current Data Parameters  
NAME fa  
EXPNO 469  
PROCNO 1

F2 - Acquisition Parameters  
Date\_ 20160531  
Time 23.52  
INSTRUM FOURIER300  
PROBHD 5 mm DUL 13C-1  
PULPROG zgpg  
TD 32768  
SOLVENT DMSO  
NS 2048  
DS 4  
SWH 24414.063 Hz  
FIDRES 0.745058 Hz  
AQ 0.6710886 sec  
RG 501.187  
DM 20.480 usec  
DE 6.50 usec  
TE 298.0 K  
D1 1.00000000 sec  
D11 0.03000000 sec  
D31 0.00001500 sec  
D32 0.89999998 sec  
D40 0.00099990 sec  
L4 23  
L5 26  
P32 90.00 usec  
TD0 1

==== CHANNEL f1 =====  
SF01 75.4878687 MHz  
NUC1 13C  
P1 15.00 usec  
PLW1 15.0000000 W

==== CHANNEL f2 =====  
SF02 300.1812007 MHz  
NUC2 1H  
CPDPRG2 waltz16  
PCPD2 90.00 usec  
PLM2 10.0000000 W  
PLM12 0.20863999 W  
PLM13 0.10495000 W

==== Processing parameters =====  
SI 32768  
SF 75.4803210 MHz  
EM  
WDW 0  
SSB 0  
LB 1.00 Hz  
GB 0  
PC 1.40

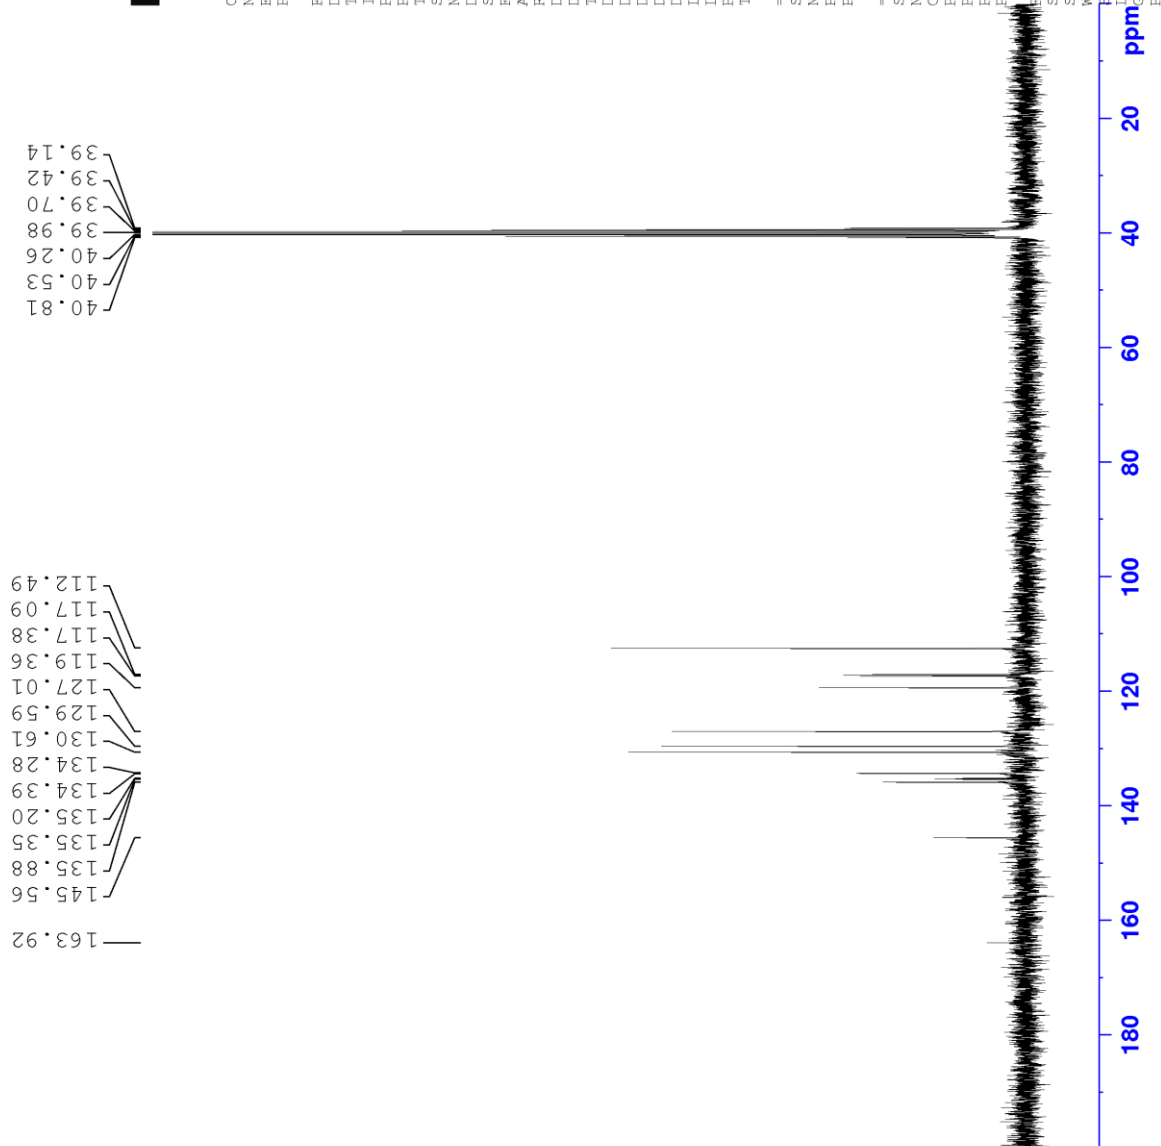

Spectra 31. <sup>13</sup>C NMR spectra of the compound 2h

Data File: C:\LabSolutions\Data\Analiz\derya\FA-8\_8.lcd

| Elmt | Val. | Min | Max | Elmt | Val. | Min | Max | Elmt | Val. | Min | Max | Use Adduct |
|------|------|-----|-----|------|------|-----|-----|------|------|-----|-----|------------|
| H    | 1    | 0   | 50  | O    | 2    | 0   | 6   | Cl   | 1    | 0   | 0   | H          |
| C    | 4    | 0   | 50  | F    | 1    | 1   | 1   | Br   | 1    | 0   | 0   |            |
| N    | 3    | 0   | 4   | S    | 2    | 0   | 1   | Pd   | 2    | 0   | 0   |            |

Error Margin (ppm): 5  
 HC Ratio: unlimited  
 Max Isotopes: 3  
 MSn Iso RI (%): 10.00

DBE Range: 10.0 - 20.0  
 Apply N Rule: yes  
 Isotope RI (%): 1.00  
 MSn Logic Mode: AND

Electron Ions: both  
 Use MSn Info: no  
 Isotope Res: 10000  
 Max Results: 500

Event#: 1 MS(E+) Ret. Time : 9.693 -> 9.693 Scan#: 1455 -> 1455

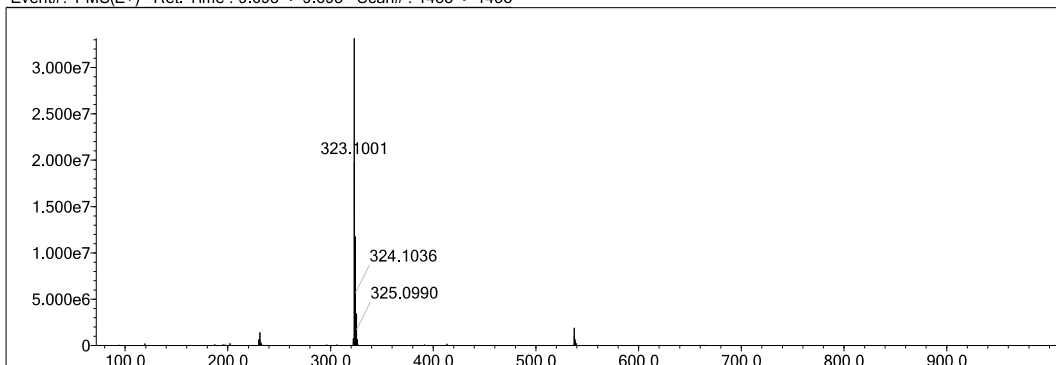

Measured region for 323.1001 m/z

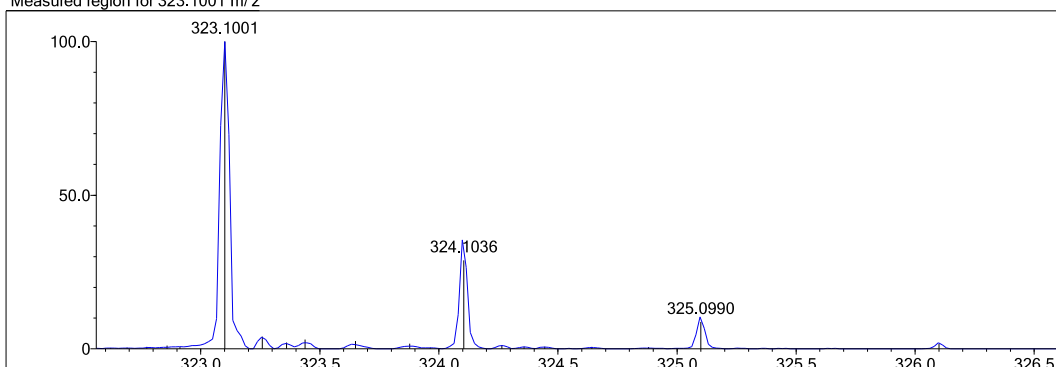

C19 H15 N2 F S [M+H]<sup>+</sup> : Predicted region for 323.1013 m/z

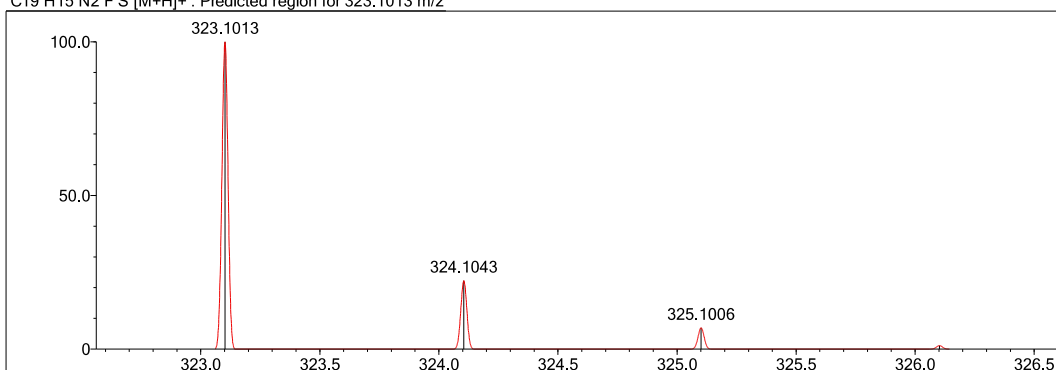

| Rank | Score | Formula (M)    | Ion                | Meas. m/z | Pred. m/z | Df. (mDa) | Df. (ppm) | Iso   | DBE  |
|------|-------|----------------|--------------------|-----------|-----------|-----------|-----------|-------|------|
| 1    | 73.78 | C19 H15 N2 F S | [M+H] <sup>+</sup> | 323.1001  | 323.1013  | -1.2      | -3.71     | 79.14 | 13.0 |

**Spectra 32.** HRMS spectra of the compound 2h



## DOPNALAB

| Item               | Value                                       |
|--------------------|---------------------------------------------|
| Acquired Date&Time | 5.10.2016 10:17:07                          |
| Acquired by        | System Administrator                        |
| Filename           | C:\Users\dopnalab\Desktop\derya\fa-2i1.ispd |
| Spectrum name      | fa-2i1                                      |
| Sample name        | fa_2i                                       |
| Sample ID          |                                             |
| Option             |                                             |
| Comment            |                                             |
| No. of Scans       | 10                                          |
| Resolution         | 4 (cm-1)                                    |
| Apodization        | Happ-Genzel                                 |

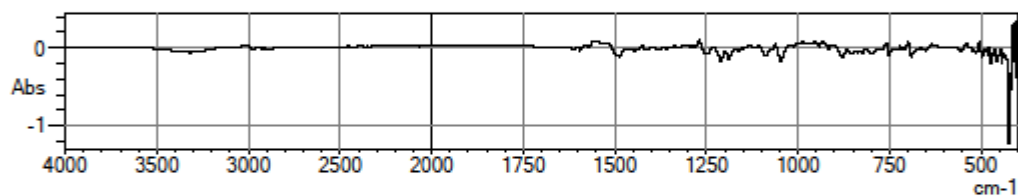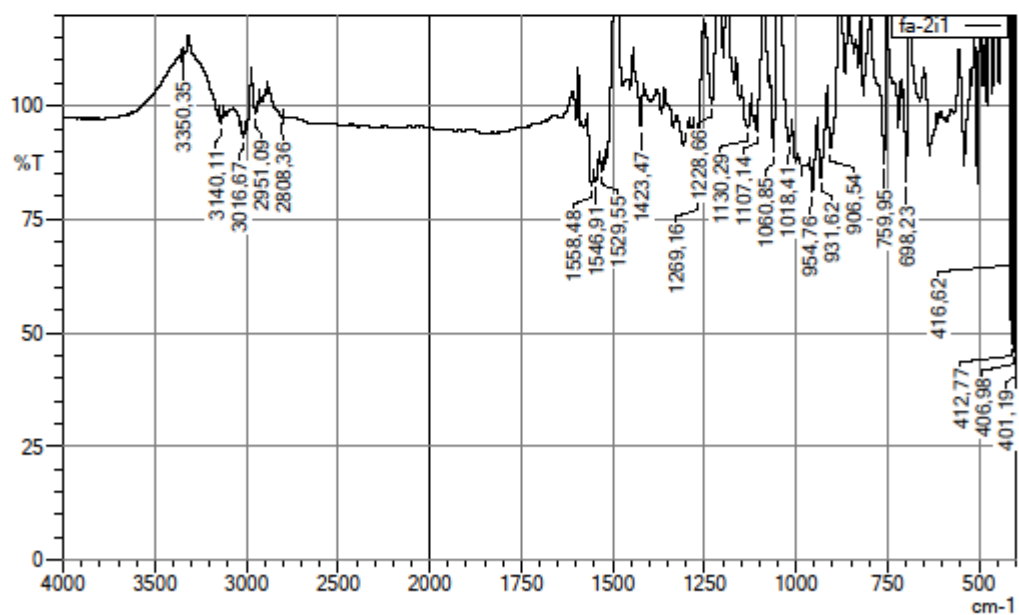

**Spectra 33.** IR spectra of the compound 2i

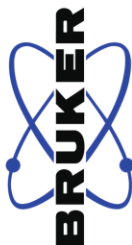

Current Data Parameters  
NAME fa  
EXPNO 470  
PROCNO 1

F2 - Acquisition Parameters  
Date\_ 20160601  
Time 0.52  
INSTRUM FOURIER300  
PROBHD 5 mm DUL 13C-1  
PULPROG zg  
TD 16384  
SOLVENT DMSO  
NS 16  
DS 0  
SWH 6103.516 Hz  
FIDRES 0.372529 Hz  
AQ 1.342173 sec  
RG 11.1916  
DW 81.920 usec  
DE 6.50 usec  
IE 298.0 K  
D1 3.00000000 sec  
TD0 1

==== CHANNEL f1 =====  
SFO1 300.1616537 MHz  
NUC1 1H  
P1 13.00 usec  
PLW1 10.00000000 W

F2 - Processing parameters  
SI 65536  
WDW EM  
SSB 0  
LB 0.30 Hz  
GB 0  
PC 1.00

10.6793  
9.0800  
8.0681  
7.9457  
7.8338  
7.8046  
7.7656  
7.7364  
7.5439  
7.2552  
7.2274  
7.2031  
7.1314  
7.1064  
6.7890  
6.7651  
6.7411  
2.5113  
2.5055  
2.4995  
2.4936  
2.4880

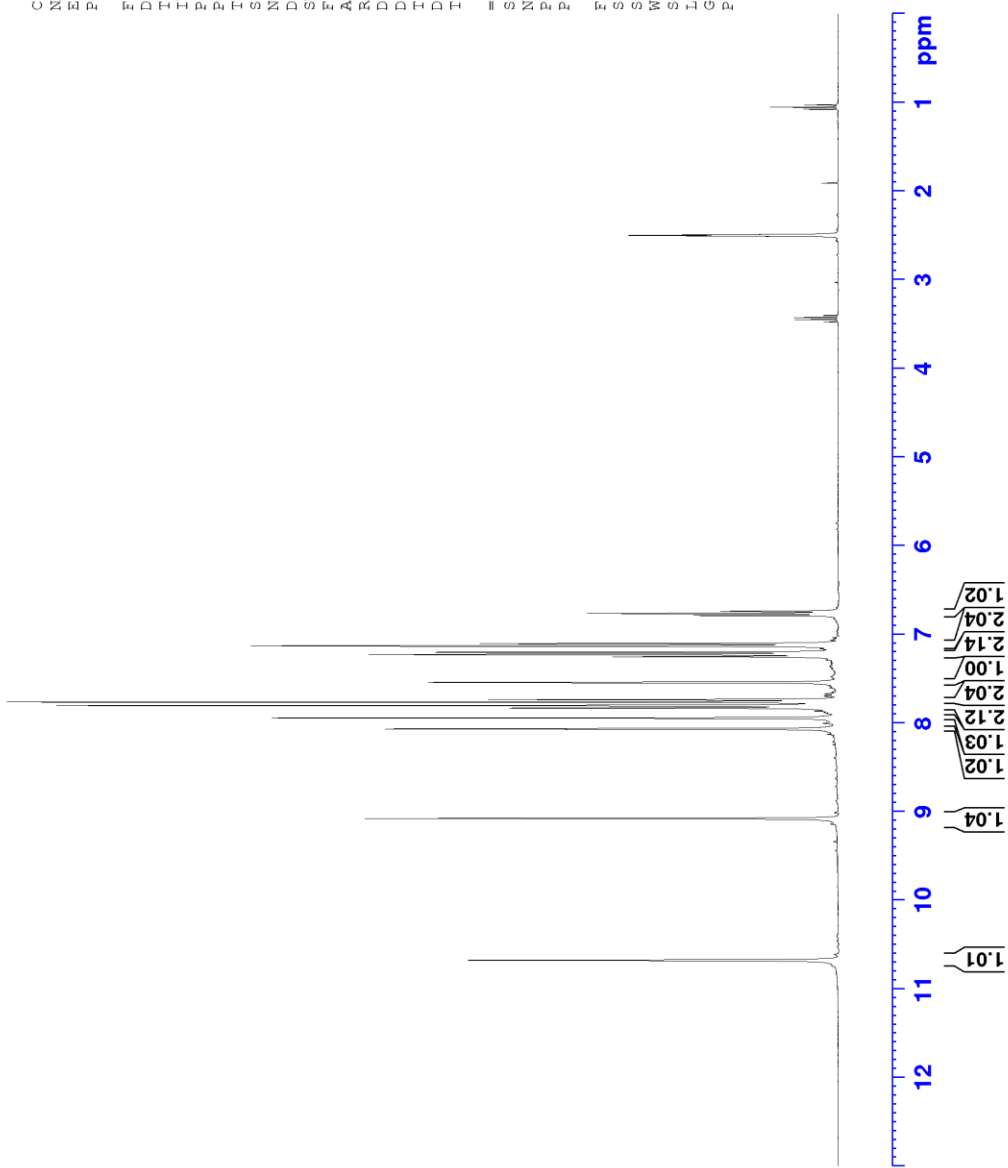

Spectra 34. <sup>1</sup>H NMR spectra of the compound 2i

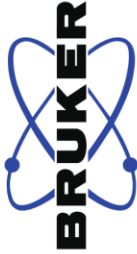

Current Data Parameters  
NAME fa  
EXPNO 471  
PROCNO 1

F2 - Acquisition Parameters

Date\_ 20160601  
Time 0.53  
INSTRUM FOURIER300  
PROBHD 5 mm DUL 13C-1  
PULPROG zgpg  
TD 32768  
SOLVENT DMSO  
NS 2048  
DS 4  
SWH 24414.063 Hz  
FIDRES 0.745058 Hz  
AQ 0.6710886 sec  
RG 501.187  
DW 20.480 usec  
DE 6.50 usec  
TE 298.1 K  
D1 1.0000000 sec  
D11 0.0300000 sec  
D31 0.0001500 sec  
D32 0.8999998 sec  
D40 0.0003990 sec  
L4 23  
L5 26  
P32 90.00 usec  
TDO 1

==== CHANNEL f1 =====  
SF01 75.4878687 MHz  
NUC1 13C  
P1 15.00 usec  
PLW1 15.0000000 W

==== CHANNEL f2 =====  
SF02 300.1812007 MHz  
NUC2 1H  
PCPRG12 waltz16  
PCPD2 90.00 usec  
PLW2 10.0000000 W  
PLW12 0.20863999 W  
PLW13 0.10495000 W

F2 - Processing parameters

SI 32768  
SF 75.4803210 MHz  
WDW EM  
SSB 0  
IB 0  
GB 0  
FC 1.40

40.81  
40.54  
40.26  
39.98  
39.70  
39.42  
39.15

145.55  
136.33  
135.38  
135.33  
135.26  
129.59  
127.19  
125.67  
121.84  
119.80  
119.48  
112.61

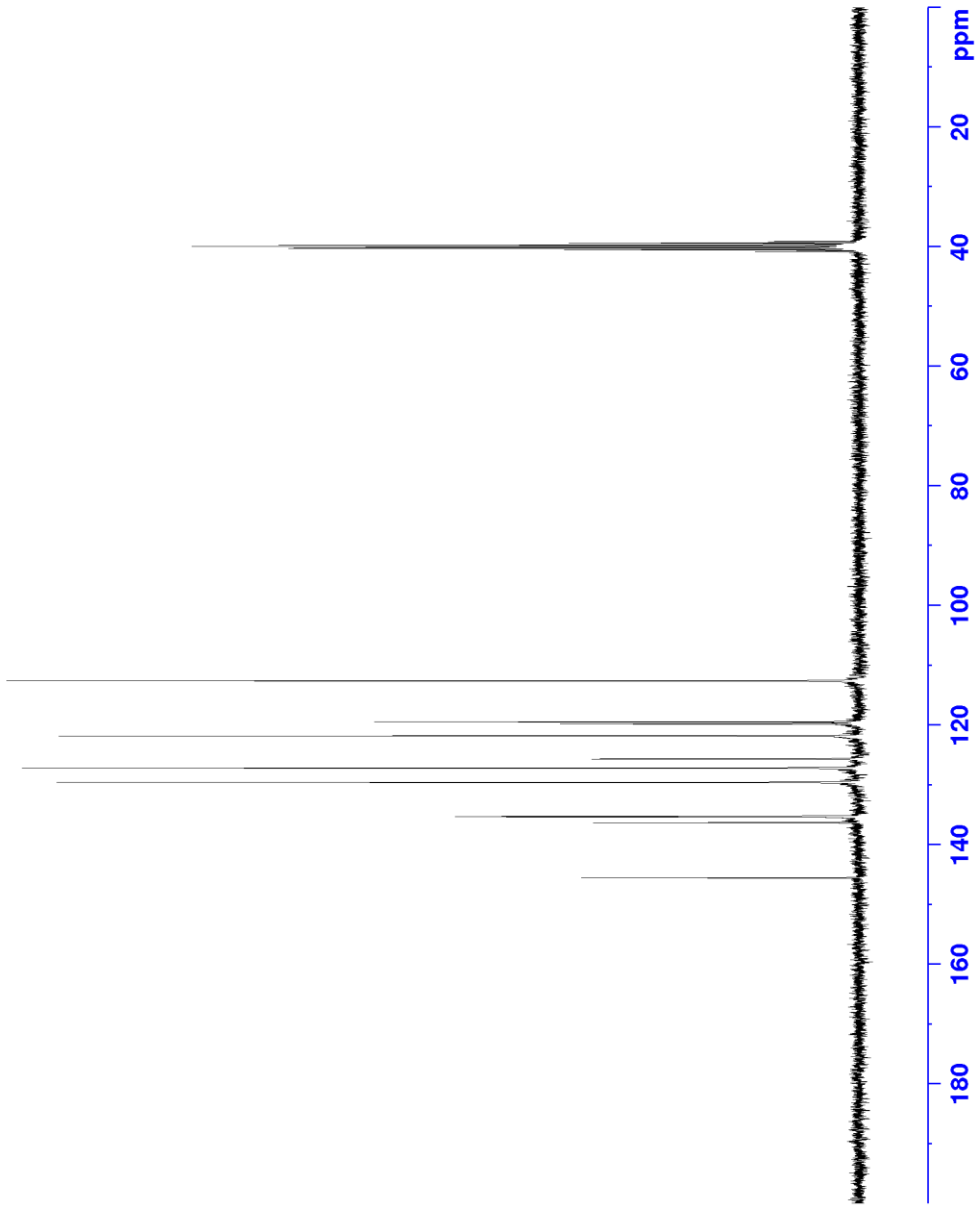

Spectra 35. <sup>13</sup>C NMR spectra of the compound 2i

Data File: C:\LabSolutions\Data\Analiz\derya\FA-9\_9.Icd

| Elmt | Val. | Min | Max | Elmt | Val. | Min | Max | Elmt | Val. | Min | Max | Use Adduct |
|------|------|-----|-----|------|------|-----|-----|------|------|-----|-----|------------|
| H    | 1    | 0   | 50  | O    | 2    | 0   | 6   | Cl   | 1    | 0   | 0   | H          |
| C    | 4    | 0   | 50  | F    | 1    | 0   | 1   | Br   | 1    | 0   | 0   |            |
| N    | 3    | 0   | 5   | S    | 2    | 0   | 1   | Pd   | 2    | 0   | 0   |            |

Error Margin (ppm): 5  
 HC Ratio: unlimited  
 Max Isotopes: 3  
 MSn Iso RI (%): 10.00

DBE Range: 10.0 - 20.0  
 Apply N Rule: yes  
 Isotope RI (%): 1.00  
 MSn Logic Mode: AND

Electron Ions: both  
 Use MSn Info: no  
 Isotope Res: 10000  
 Max Results: 500

Event#: 1 MS(E+) Ret. Time : 4.400 -> 4.520 Scan# : 661 -> 679

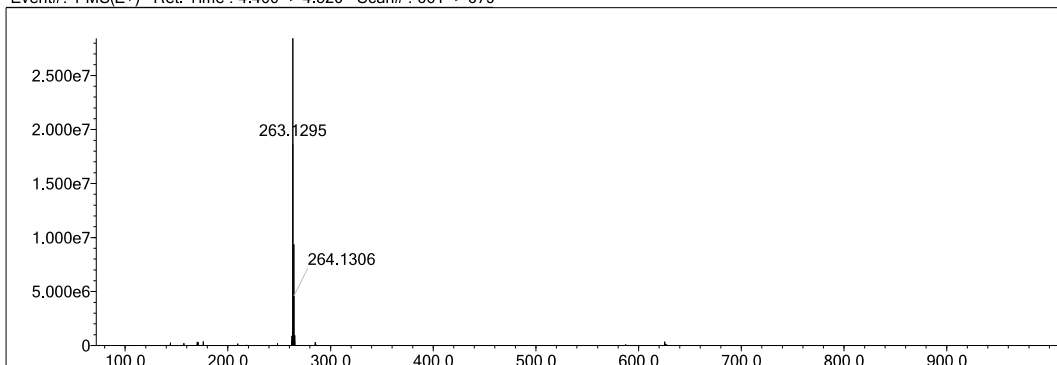

Measured region for 263.1295 m/z

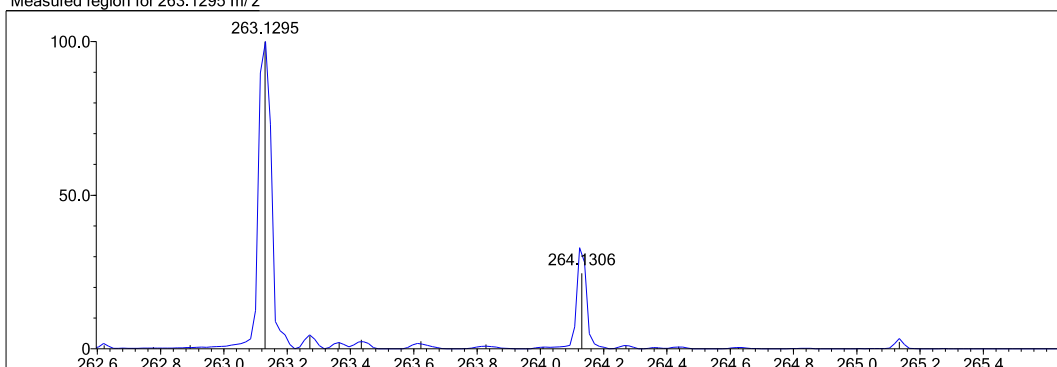

C16 H14 N4 [M+H]+ : Predicted region for 263.1291 m/z

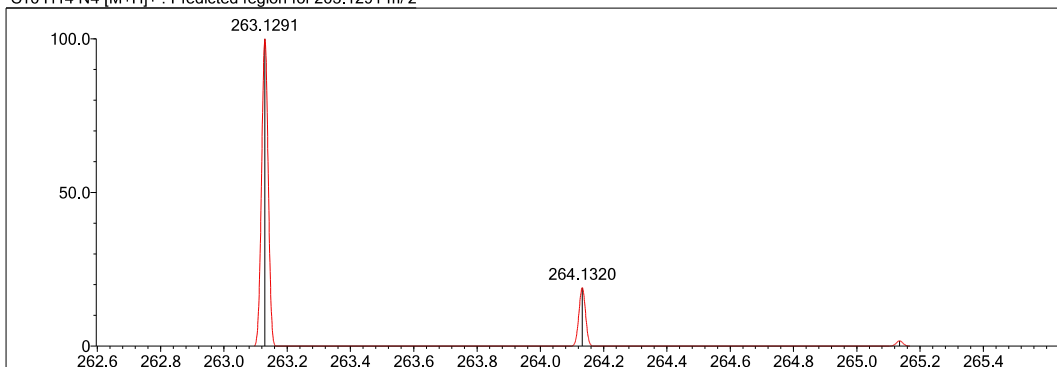

| Rank | Score | Formula (M) | Ion    | Meas. m/z | Pred. m/z | Df. (mDa) | Df. (ppm) | Iso   | DBE  |
|------|-------|-------------|--------|-----------|-----------|-----------|-----------|-------|------|
| 1    | 74.65 | C16 H14 N4  | [M+H]+ | 263.1295  | 263.1291  | 0.4       | 1.52      | 75.64 | 12.0 |

**Spectra 36.** HRMS spectra of the compound 2i

## DOPNALAB

| Item               | Value                                          |
|--------------------|------------------------------------------------|
| Acquired Date&Time | 5.10.2016 10:21:39                             |
| Acquired by        | System Administrator                           |
| Filename           | C:\Users\dopnalab\Desktop\derya\faifa-2\1.ispd |
| Spectrum name      | fa-2\1                                         |
| Sample name        | fa_2\                                          |
| Sample ID          |                                                |
| Option             |                                                |
| Comment            |                                                |
| No. of Scans       | 10                                             |
| Resolution         | 4 (cm-1)                                       |
| Apodization        | Happ-Genzel                                    |

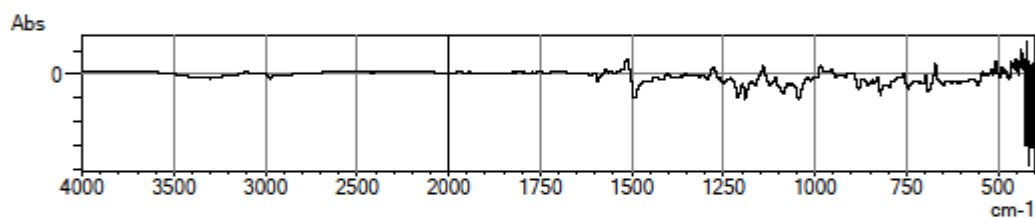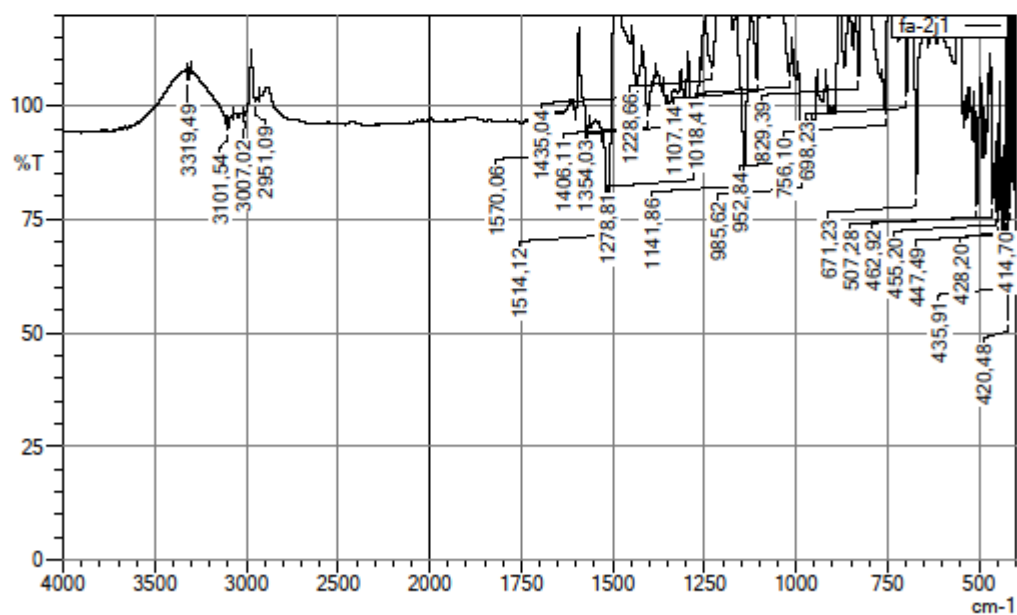

Spectra 37. IR spectra of the compound 2j

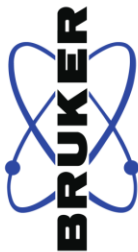

Current Data Parameters  
NAME fa  
EXPNO 472  
PROCNO 1

F2 - Acquisition Parameters  
Date\_ 20160601  
Time 1.54  
INSTRUM FOURIER300  
PROBHD 5 mm DUL 13C-1  
PULPROG zgpg  
ID 16384  
SOLVENT DMSO  
NS 16  
DS 0  
SWH 6103.516 Hz  
FIDRES 0.372529 Hz  
AQ 1.3421773 sec  
RG 20.8341  
DW 81.920 usec  
DE 6.50 usec  
TE 298.2 K  
D1 3.0000000 sec  
TD0 1

==== CHANNEL f1 =====  
SFO1 300.1818537 MHz  
NUC1 1H  
P1 13.00 usec  
PLW1 10.00000000 W

F2 - Processing parameters  
SI 63536  
SF 300.1800000 MHz  
WDW EM  
SSB 0  
LB 0.30 Hz  
GB 0  
PC 1.00

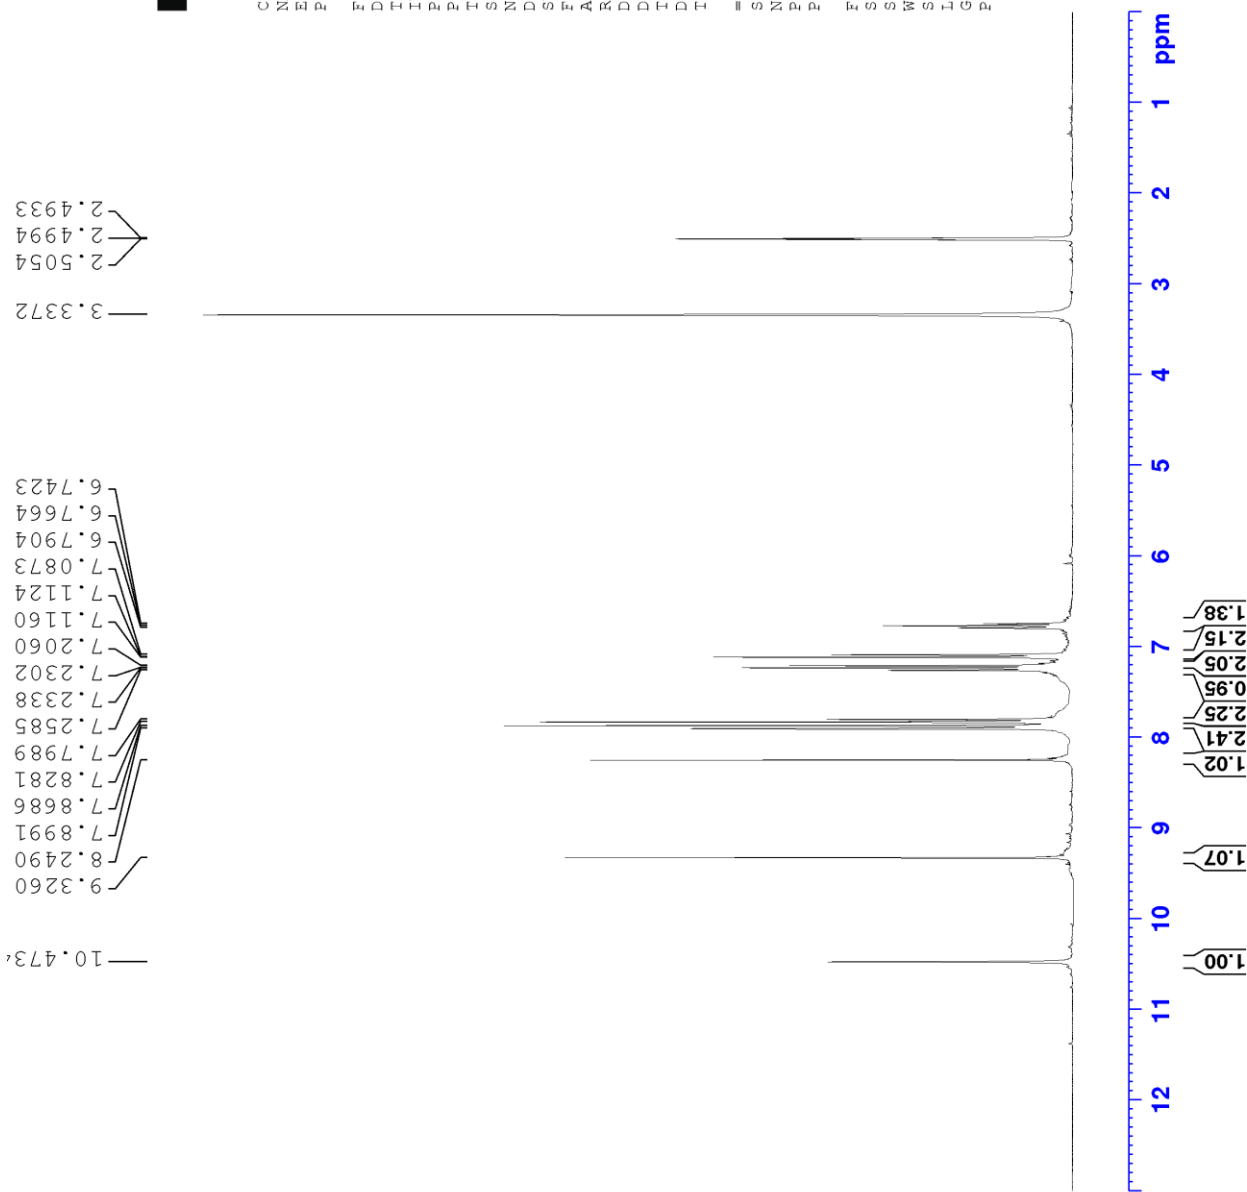

Spectra 38. <sup>1</sup>H NMR spectra of the compound 2j

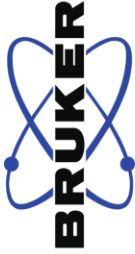

40.81  
40.53  
40.25  
39.98  
39.70  
39.42  
39.14

152.87  
145.55  
142.67  
136.35  
135.82  
135.55  
129.61  
127.17  
120.05  
119.45  
112.56

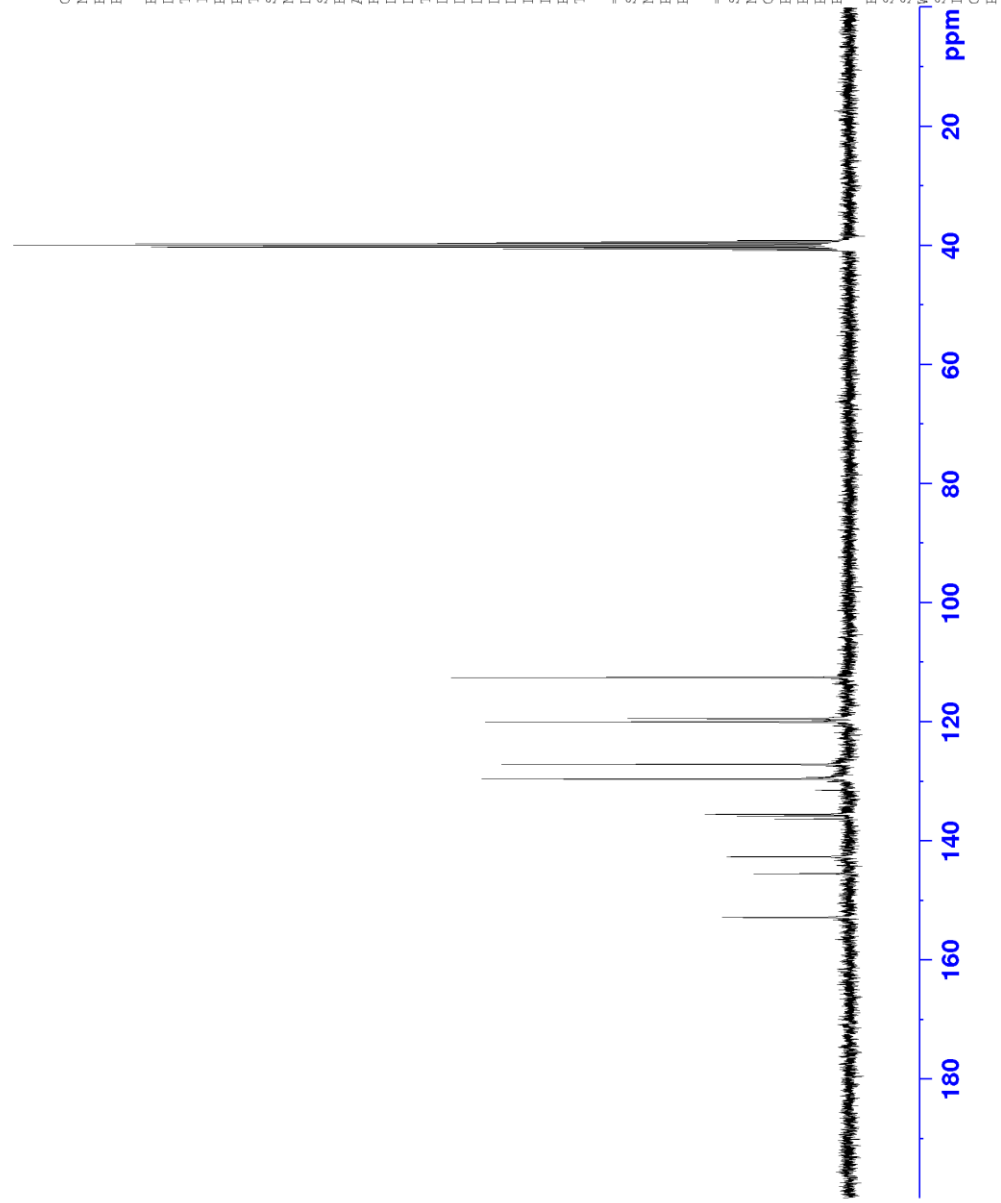

Current Data Parameters  
NAME fa  
EXPNO 473  
PROCNO 1

F2 - Acquisition Parameters  
Date\_ 20160601  
Time 1.56  
INSTRUM FOURIER300  
PROBHD 5 mm DUL 13C-1  
PULPROG zgpg  
TD 32768  
SOLVENT DMSO  
NS 2048  
DS 4  
SWH 24414.063 Hz  
FIDRES 0.745058 Hz  
AQ 0.6710886 sec  
RG 501.187  
DW 20.460 usec  
DE 6.50 usec  
TE 298.0 K  
D1 1.00000000 sec  
D11 0.03000000 sec  
D31 0.00001500 sec  
D32 0.89999998 sec  
D40 0.00003990 sec  
L4 23  
L5 26  
P32 90.00 usec  
TD0 1

==== CHANNEL f1 =====  
SF01 75.4878687 MHz  
NUC1 13C  
P1 15.00 usec  
PLW1 15.00000000 W  
  
==== CHANNEL f2 =====  
SF02 300.1812007 MHz  
NUC2 1H  
CPDPRG2 waltz16  
PCPD2 90.00 usec  
PLW2 10.00000000 W  
PLW12 0.20863939 W  
PLW13 0.10495000 W

F2 - Processing parameters  
SI 32768  
SF 75.4803210 MHz  
WDW EM  
SSB 0  
LB 1.00 Hz  
GB 0  
PC 1.40

Spectra 39. <sup>13</sup>C NMR spectra of the compound 2j

Data File: C:\LabSolutions\Data\Analiz\dera\FA-10\_10.lcd

| Elmt | Val. | Min | Max | Elmt | Val. | Min | Max | Elmt | Val. | Min | Max | Use Adduct |
|------|------|-----|-----|------|------|-----|-----|------|------|-----|-----|------------|
| H    | 1    | 0   | 50  | O    | 2    | 0   | 6   | Cl   | 1    | 0   | 0   | H          |
| C    | 4    | 0   | 50  | F    | 1    | 0   | 1   | Br   | 1    | 0   | 0   |            |
| N    | 3    | 0   | 5   | S    | 2    | 0   | 1   | Pd   | 2    | 0   | 0   |            |

Error Margin (ppm): 10  
 HC Ratio: unlimited  
 Max Isotopes: 3  
 MSn Iso RI (%): 10.00

DBE Range: 10.0 - 20.0  
 Apply N Rule: yes  
 Isotope RI (%): 1.00  
 MSn Logic Mode: AND

Electron Ions: both  
 Use MSn Info: no  
 Isotope Res: 10000  
 Max Results: 500

Event#: 1 MS(E+) Ret. Time : 6.947 Scan#: 1043

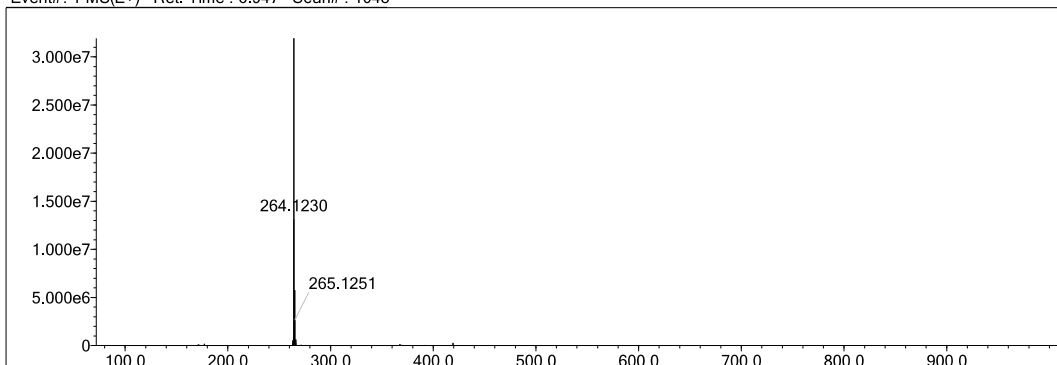

Measured region for 264.1230 m/z

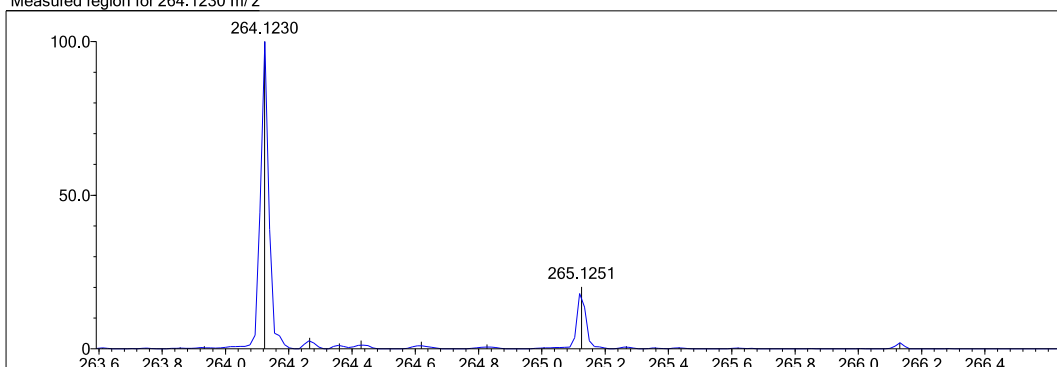

C15 H13 N5 [M+H]+ : Predicted region for 264.1244 m/z

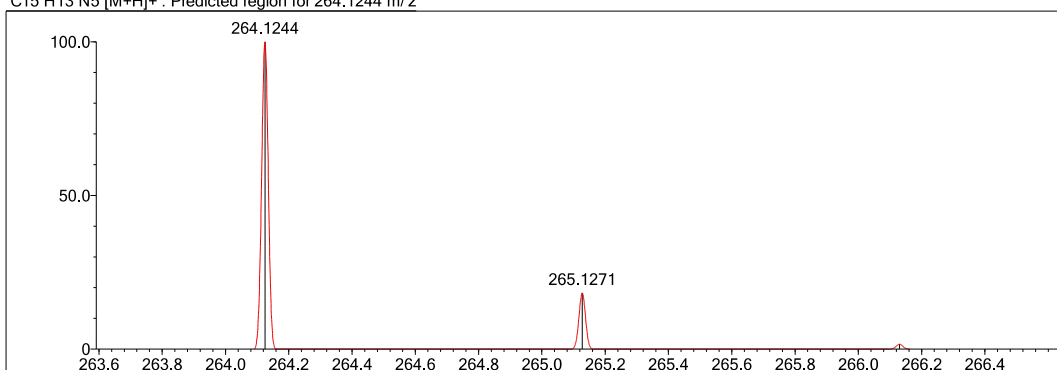

| Rank | Score | Formula (M) | Ion    | Meas. m/z | Pred. m/z | Df. (mDa) | Df. (ppm) | Iso   | DBE  |
|------|-------|-------------|--------|-----------|-----------|-----------|-----------|-------|------|
| 1    | 82.79 | C15 H13 N5  | [M+H]+ | 264.1230  | 264.1244  | -1.4      | -5.30     | 95.17 | 12.0 |

**Spectra 40.** HRMS spectra of the compound 2j



## DOPNALAB

| Item               | Value                                       |
|--------------------|---------------------------------------------|
| Acquired Date&Time | 7.08.2017 10:39:00                          |
| Acquired by        | System Administrator                        |
| Filename           | C:\Users\dopnalab\Desktop\derya\fa-141.ispd |
| Spectrum name      | fa-141                                      |
| Sample name        | fa-141                                      |
| Sample ID          |                                             |
| Option             |                                             |
| Comment            |                                             |
| No. of Scans       | 10                                          |
| Resolution         | 4 (cm-1)                                    |
| Apodization        | Happ-Genzel                                 |

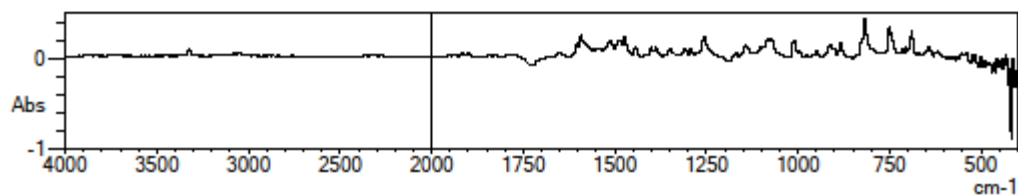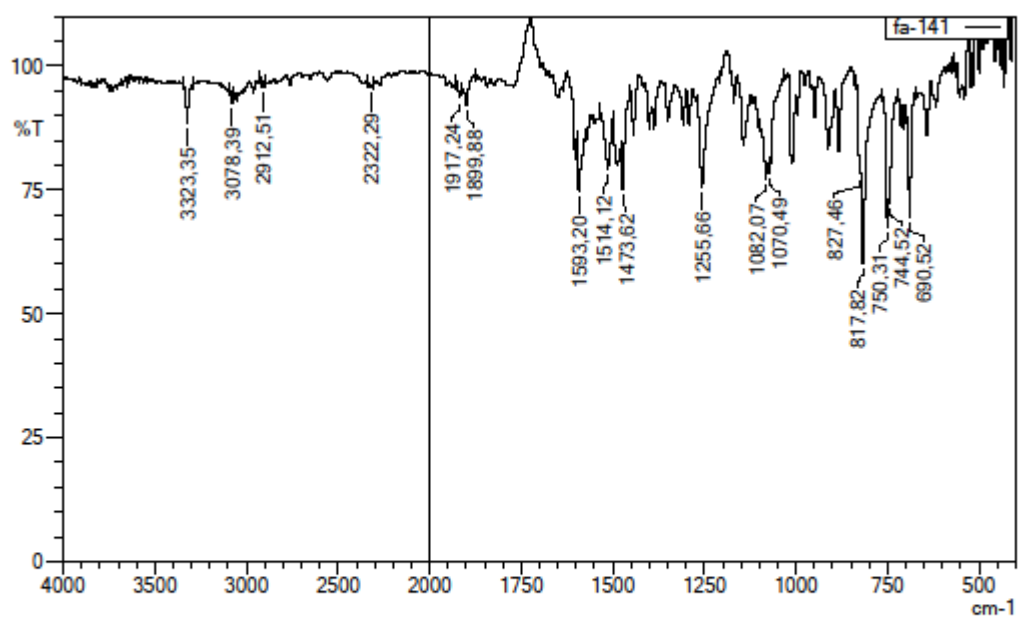

Spectra 41. IR spectra of the compound 2k

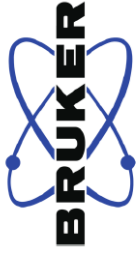

Current Data Parameters  
NAME FA-14  
EXPNO 1  
PROCNO 1

F2 - Acquisition Parameters  
Date\_ 20170804  
Time 12.31  
INSTRUM FOURIER300  
PROBHD 5 mm DUL 13C-1  
PULPROG zg  
TD 16384  
SOLVENT DMSO  
NS 16  
DS 0  
SWH 6103.516 Hz  
FIDRES 0.372529 Hz  
AQ 1.3421773 sec  
RG 20.9771  
DW 81.920 usec  
DE 6.50 usec  
TE 299.9 K  
D1 3.0000000 sec  
TD0 1

==== CHANNEL f1 =====  
SF01 300.1818537 MHz  
NUC1 1H  
P1 13.00 usec  
PLW1 10.0000000 W

F2 - Processing parameters  
SI 65536  
SF 300.1800000 MHz  
WDW EM  
SSB 0  
LB 0.30 Hz  
GB 0  
PC 1.00

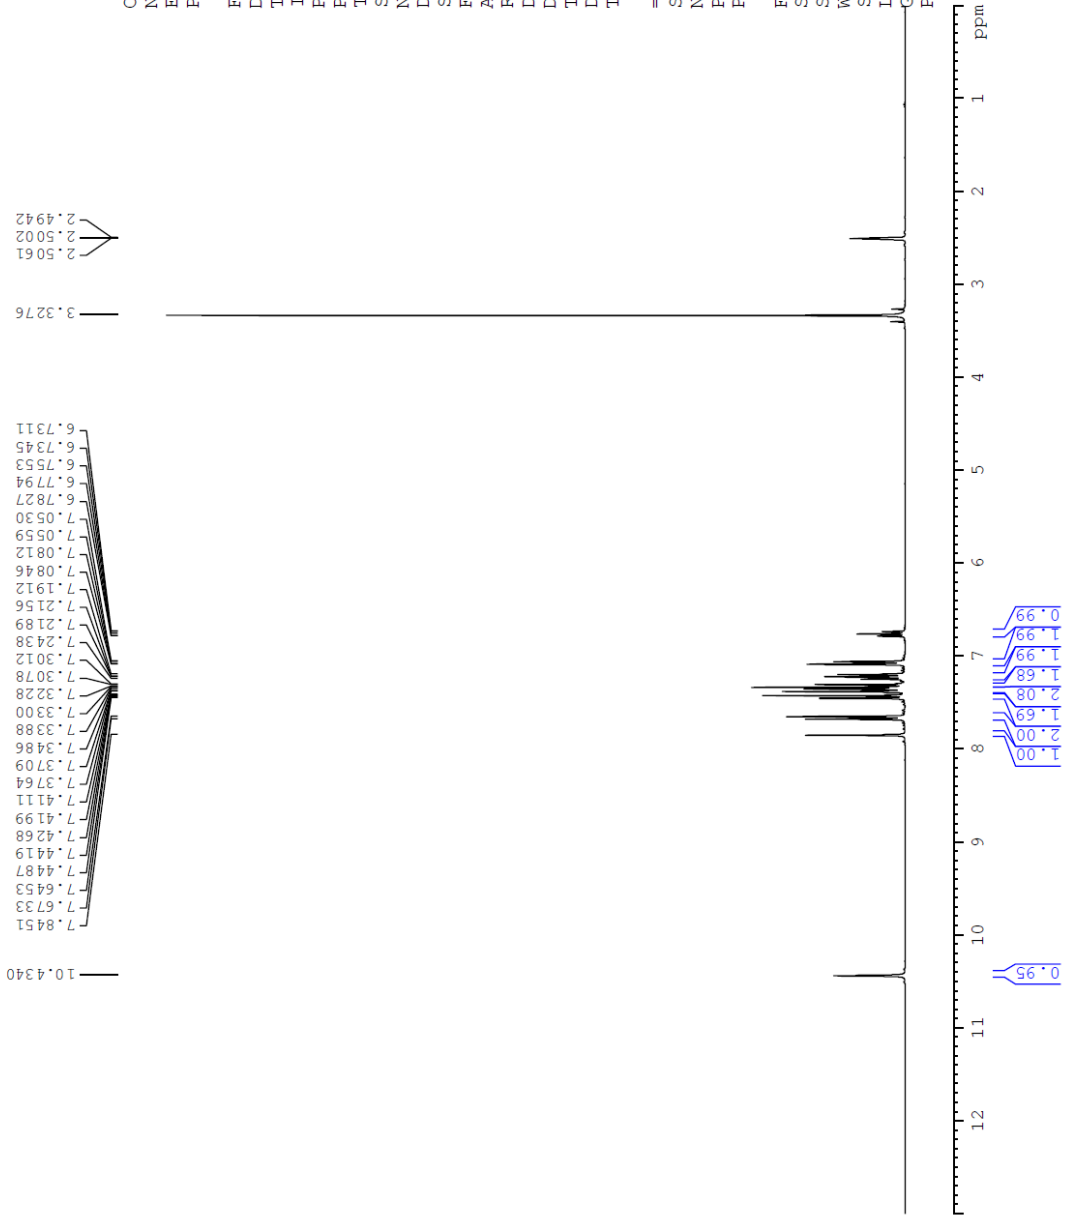

Spectra 42. <sup>1</sup>H NMR spectra of the compound 2k

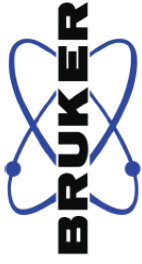

Current Data Parameters  
NAME FA-14  
EXPNO 2  
PROCNO 1

F2 - Acquisition Parameters  
Date\_ 20170804  
Time 12.33  
INSTRUM FOURIER300  
PROBHD 5 mm DUL 13C-1  
PULPROG zgpg  
TD 32768  
SOLVENT DMSO  
NS 2048  
DS 4  
SWH 24414.063 Hz  
FIDRES 0.745058 Hz  
AQ 0.6710886 sec  
RG 501.187  
DW 20.480 usec  
DE 6.50 usec  
TE 300.1 K  
D1 1.00000000 sec  
D11 0.03000000 sec  
D31 0.00001500 sec  
D32 0.89999998 sec  
D40 0.00093990 sec  
L4 23  
L5 26  
F32 90.00 usec  
TD0 1

==== CHANNEL f1 =====  
SF01 75.4878687 MHz  
NUC1 13C  
P1 15.00 usec  
PLW1 15.00000000 W

==== CHANNEL f2 =====  
SF02 300.1812007 MHz  
NUC2 1H  
CPDPRG[2] waltz16  
PCPD2 90.00 usec  
PLW2 10.00000000 W  
PLW12 0.20863999 W  
PLW13 0.10495000 W

F2 - Processing parameters  
SI 32768  
SF 75.4803210 MHz  
EM  
WDW 0  
SSB 0  
LB 1.00 Hz  
GB 0  
PC 1.40

40.84  
40.56  
40.28  
40.00  
39.73  
39.45  
39.17

149.53  
136.07  
135.76  
134.94  
133.38  
132.40  
132.18  
132.12  
129.96  
129.59  
127.13  
119.44  
112.54

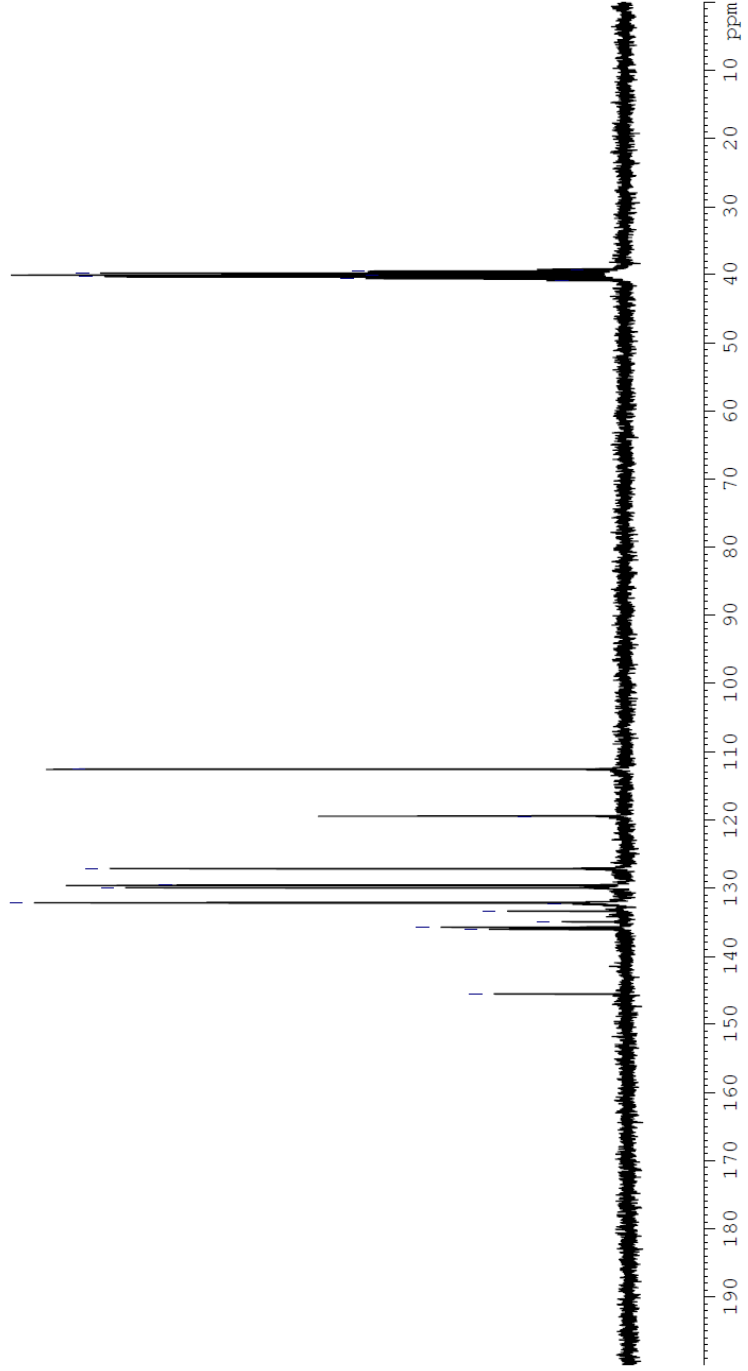

Spectra 43. <sup>13</sup>C NMR spectra of the compound 2k

# LCMSMS ANALYSIS REPORT

Sample Name : FA-14  
Sample ID :  
Data Filename : FA-14\_004.lcd  
Method Filename : geneltarama.lcm  
Batch Filename : batch.lcb  
Vial # : 1-79  
Injection Volume : 1 uL  
Date Acquired : 04.08.2017 14:52:32  
Date Processed : 04.08.2017 14:54:35  
Sample Type : Unknown  
Acquired by : System Administrator  
Processed by : System Administrator

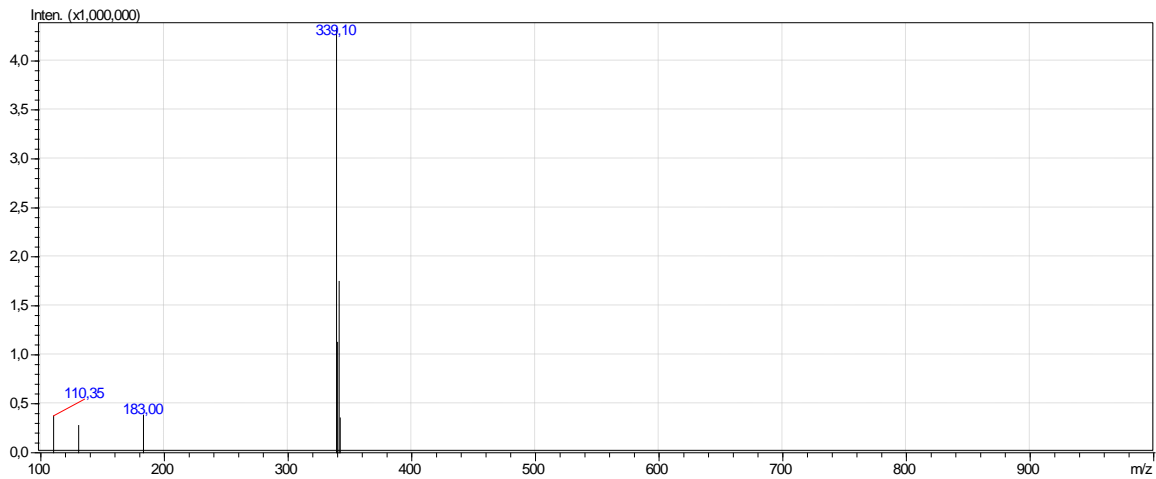

## [MS Spectrum]

# of Peaks 7  
Raw Spectrum [1,590],(scan:[95])  
Background [0,068->0,203],(scan:[5->13])  
Base Peak m/z 339,10 (Inten : 4.335.027)

| m/z    | Absolute Intensity | Relative Intensity |
|--------|--------------------|--------------------|
| 110,35 | 377521             | 8,71               |
| 130,70 | 279346             | 6,44               |
| 183,00 | 385160             | 8,88               |
| 339,10 | 4335027            | 100,00             |
| 340,10 | 1128654            | 26,04              |
| 341,20 | 1751529            | 40,40              |
| 342,15 | 357781             | 8,25               |

Event 1

**Spectra 44.** LCMSMS spectra of the compound 2k

## DOPNALAB

| Item               | Value                                       |
|--------------------|---------------------------------------------|
| Acquired Date&Time | 7.08.2017 10:36:28                          |
| Acquired by        | System Administrator                        |
| Filename           | C:\Users\dopnalab\Desktop\derya\fa-131.ispd |
| Spectrum name      | fa-131                                      |
| Sample name        | fa-13                                       |
| Sample ID          |                                             |
| Option             |                                             |
| Comment            |                                             |
| No. of Scans       | 10                                          |
| Resolution         | 4 (cm-1)                                    |
| Apodization        | Happ-Genzel                                 |

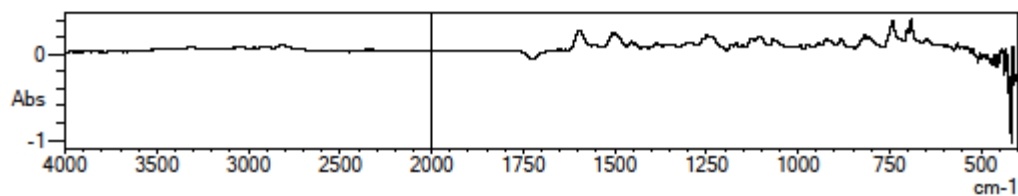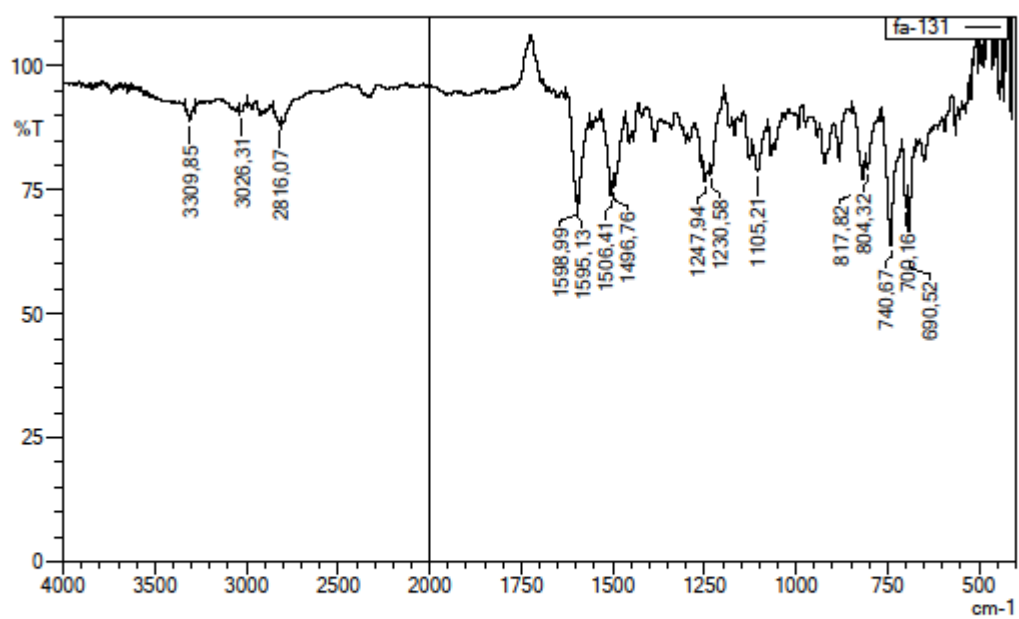

**Spectra 45.** IR spectra of the compound 2l

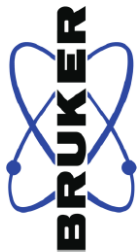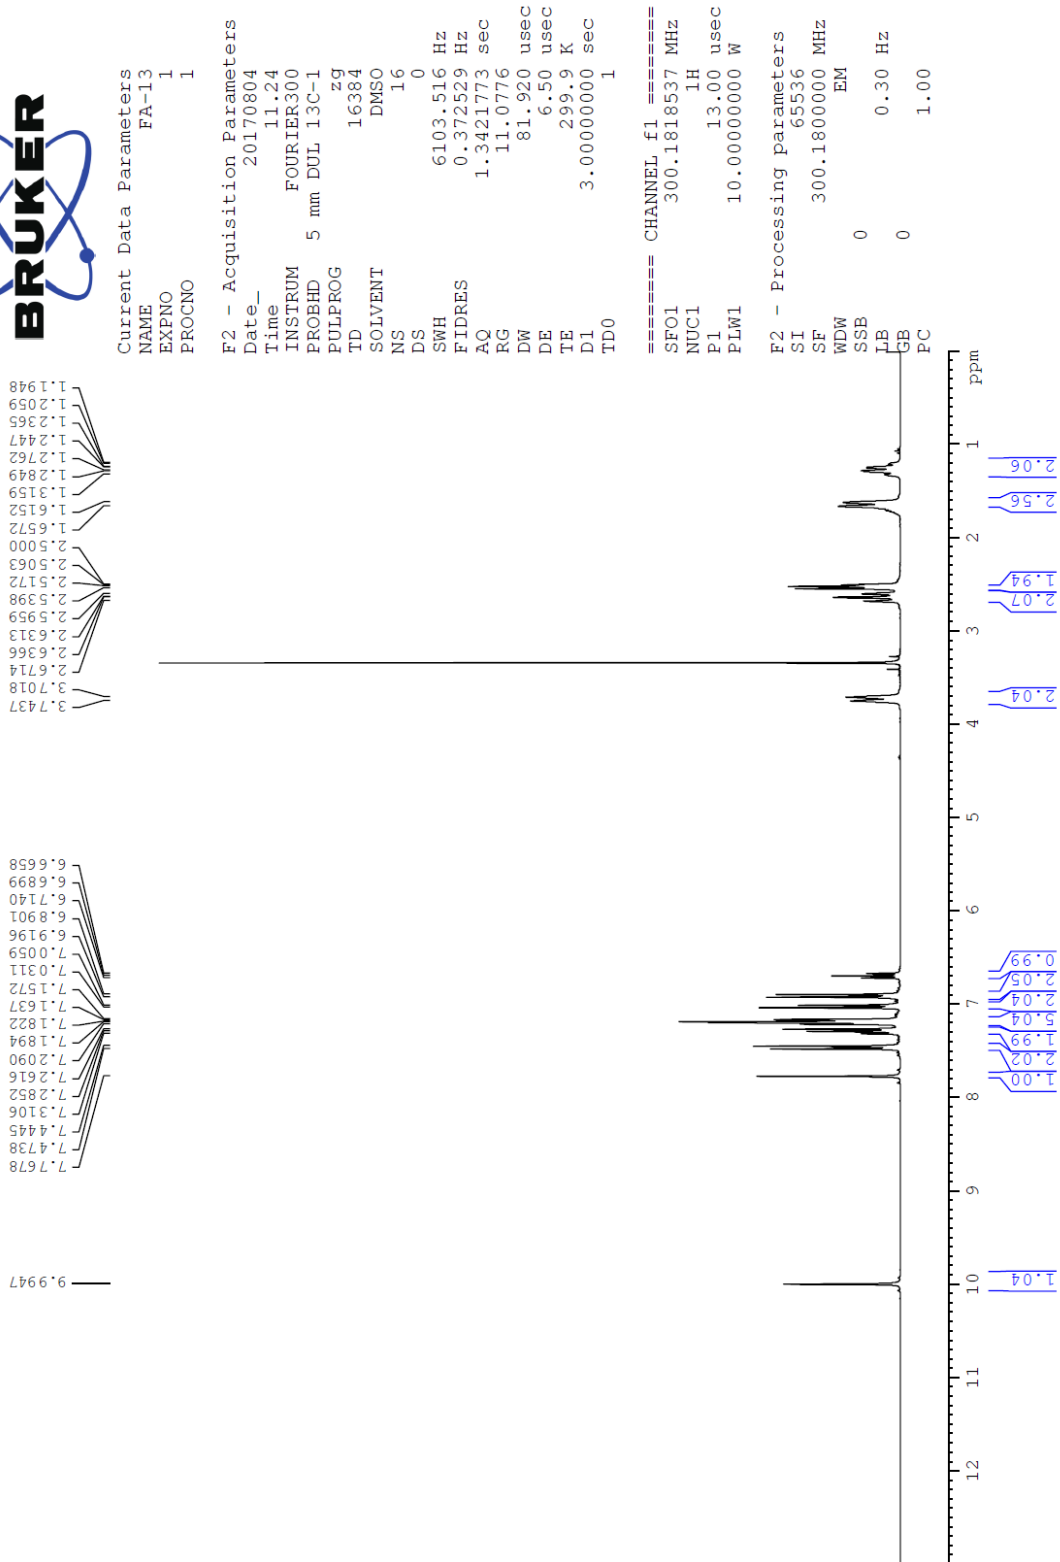

Spectra 46.  $^1\text{H}$  NMR spectra of the compound 21

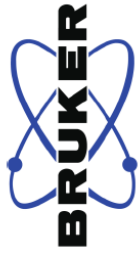

Current Data Parameters  
NAME FA-13  
EXPNO 2  
PROCNO 1

F2 - Acquisition Parameters  
Date\_ 20170804  
Time 11.31  
INSTRUM FOURIER300  
PROBHD 5 mm DUL 13C-1  
PULPROG zgpg  
TD 32768  
SOLVENT DMSO  
NS 2048  
DS 4  
SWH 24414.063 Hz  
FIDRES 0.745038 Hz  
AQ 0.6710886 sec  
RG 501.187  
DW 20.480 usec  
DE 6.50 usec  
TE 299.7 K  
D1 1.00000000 sec  
D11 0.03000000 sec  
D31 0.00001500 sec  
D32 0.89999998 sec  
D40 0.00009390 sec  
L4 23  
L5 26  
P32 90.00 usec  
TD0 1

==== CHANNEL f1 =====  
SFO1 75.4878687 MHz  
NUC1 13C  
P1 15.00 usec  
PLW1 15.00000000 W

==== CHANNEL f2 =====  
SFO2 300.1812007 MHz  
NUC2 1H  
CFDPRG[2] waitz16  
PCPD2 90.00 usec  
PLW2 10.00000000 W  
PLW12 0.20863999 W  
PLW13 0.10495000 W

F2 - Processing Parameters  
SI 32768  
SF 75.4803210 MHz  
WDW EM  
SSB 0  
GB 0  
PC 1.40

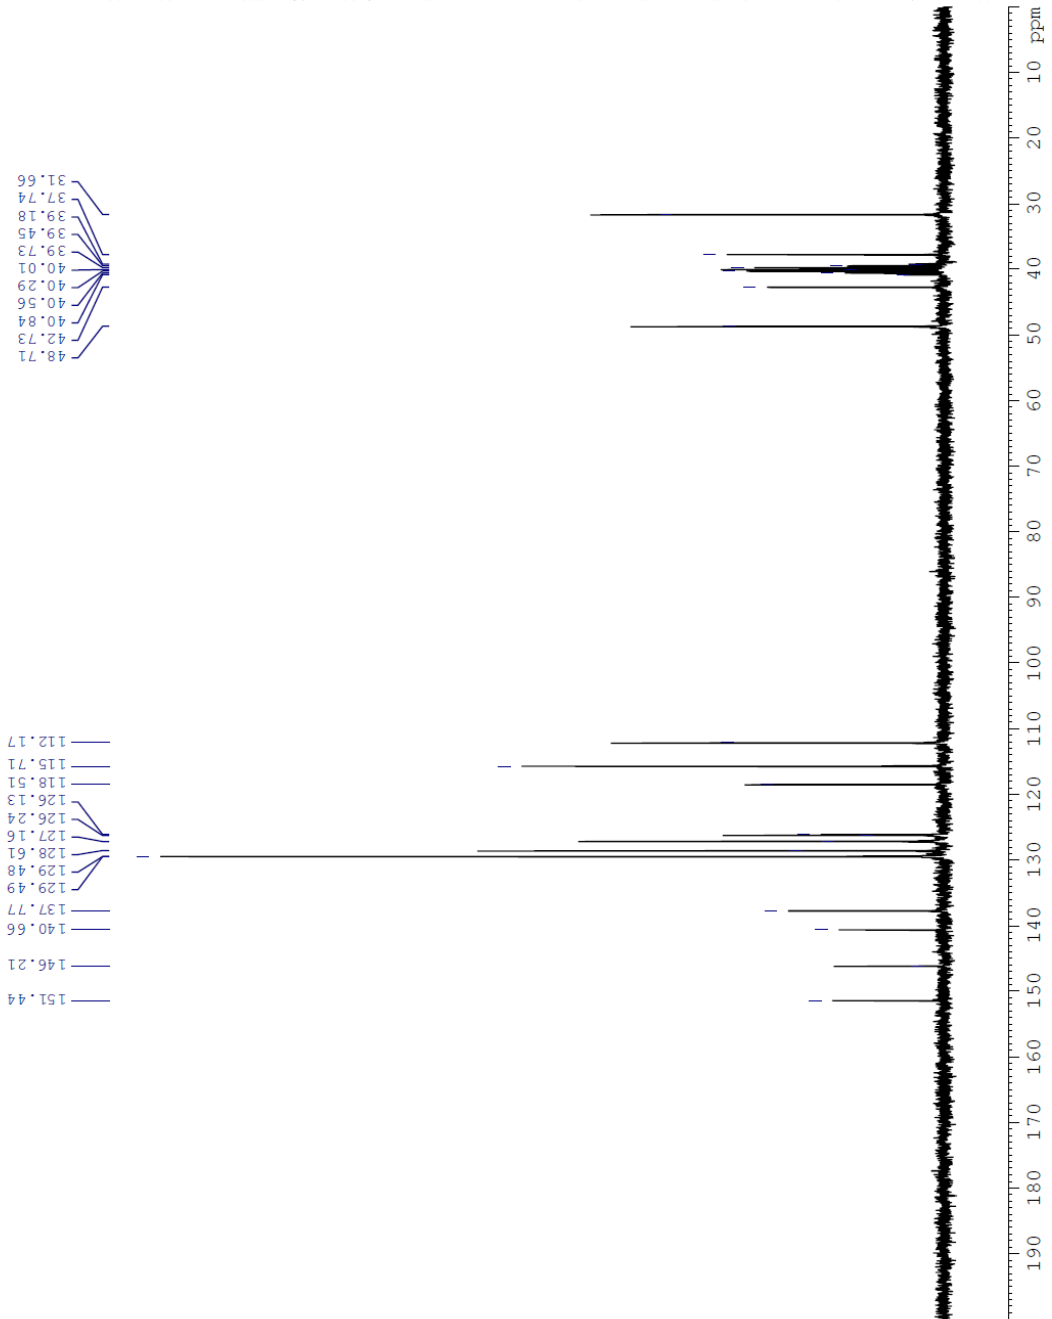

Spectra 47. <sup>13</sup>C NMR spectra of the compound 21

# LCMSMS ANALYSIS REPORT

Sample Name : FA-13  
Sample ID :  
Data Filename : FA-13\_003.lcd  
Method Filename : geneltarama.lcm  
Batch Filename : batch.lcb  
Vial # : 1-78  
Injection Volume : 1 uL  
Date Acquired : 04.08.2017 14:49:53  
Date Processed : 04.08.2017 14:51:56  
Sample Type : Unknown  
Acquired by : System Administrator  
Processed by : System Administrator

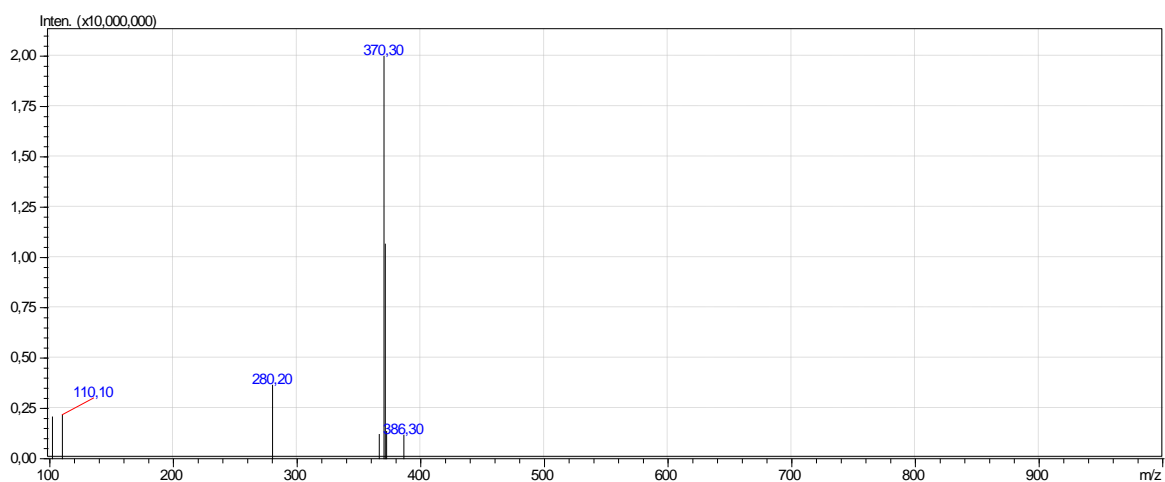

## [MS Spectrum]

# of Peaks : 8  
Raw Spectrum : [1,590],(scan:[95])  
Background : No Background Spectrum  
Base Peak : m/z 370,30 (Inten : 20.000.000)

| m/z    | Absolute Intensity | Relative Intensity |
|--------|--------------------|--------------------|
| 102,15 | 2086434            | 10,43              |
| 110,10 | 2194096            | 10,97              |
| 280,20 | 3659206            | 18,30              |
| 366,35 | 1214546            | 6,07               |
| 370,30 | 20000000           | 100,00             |
| 371,30 | 10672056           | 53,36              |
| 372,40 | 1362345            | 6,81               |
| 386,30 | 1181229            | 5,91               |
| Event  | 1                  |                    |

**Spectra 48.** LCMSMS spectra of the compound 21



## DOPNALAB

| Item               | Value                                        |
|--------------------|----------------------------------------------|
| Acquired Date&Time | 7.08.2017 10:28:53                           |
| Acquired by        | System Administrator                         |
| Filename           | C:\Users\dopnalabi\Desktop\derya\fa-111.ispd |
| Spectrum name      | fa-111                                       |
| Sample name        | fa-11                                        |
| Sample ID          |                                              |
| Option             |                                              |
| Comment            |                                              |
| No. of Scans       | 10                                           |
| Resolution         | 4 (cm-1)                                     |
| Apodization        | Happ-Genzel                                  |

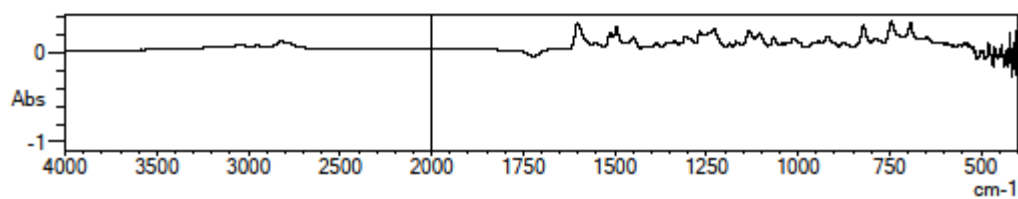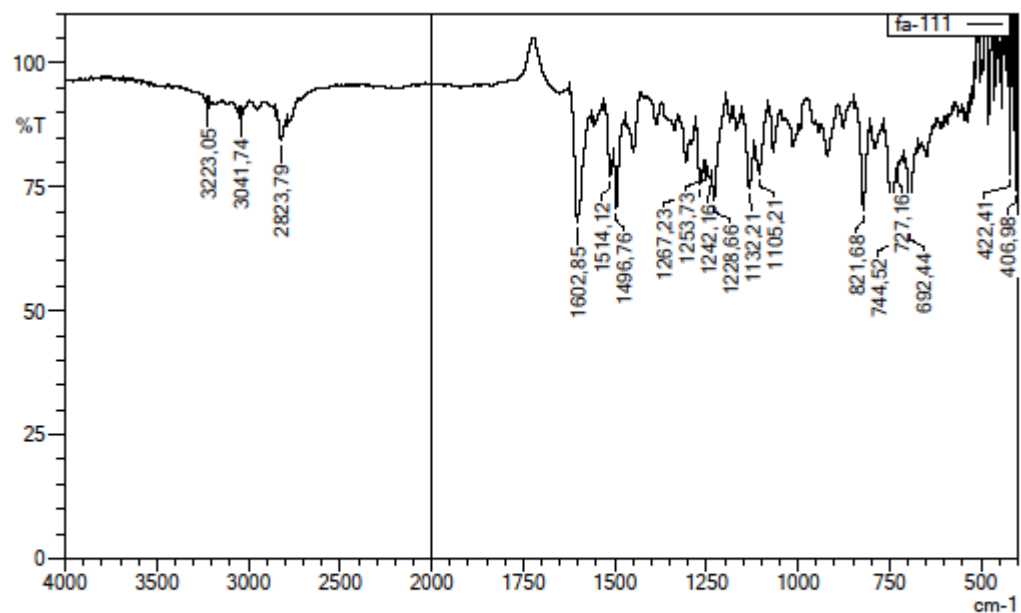

**Spectra 49.** IR spectra of the compound 2m

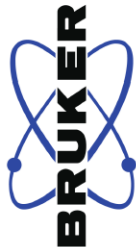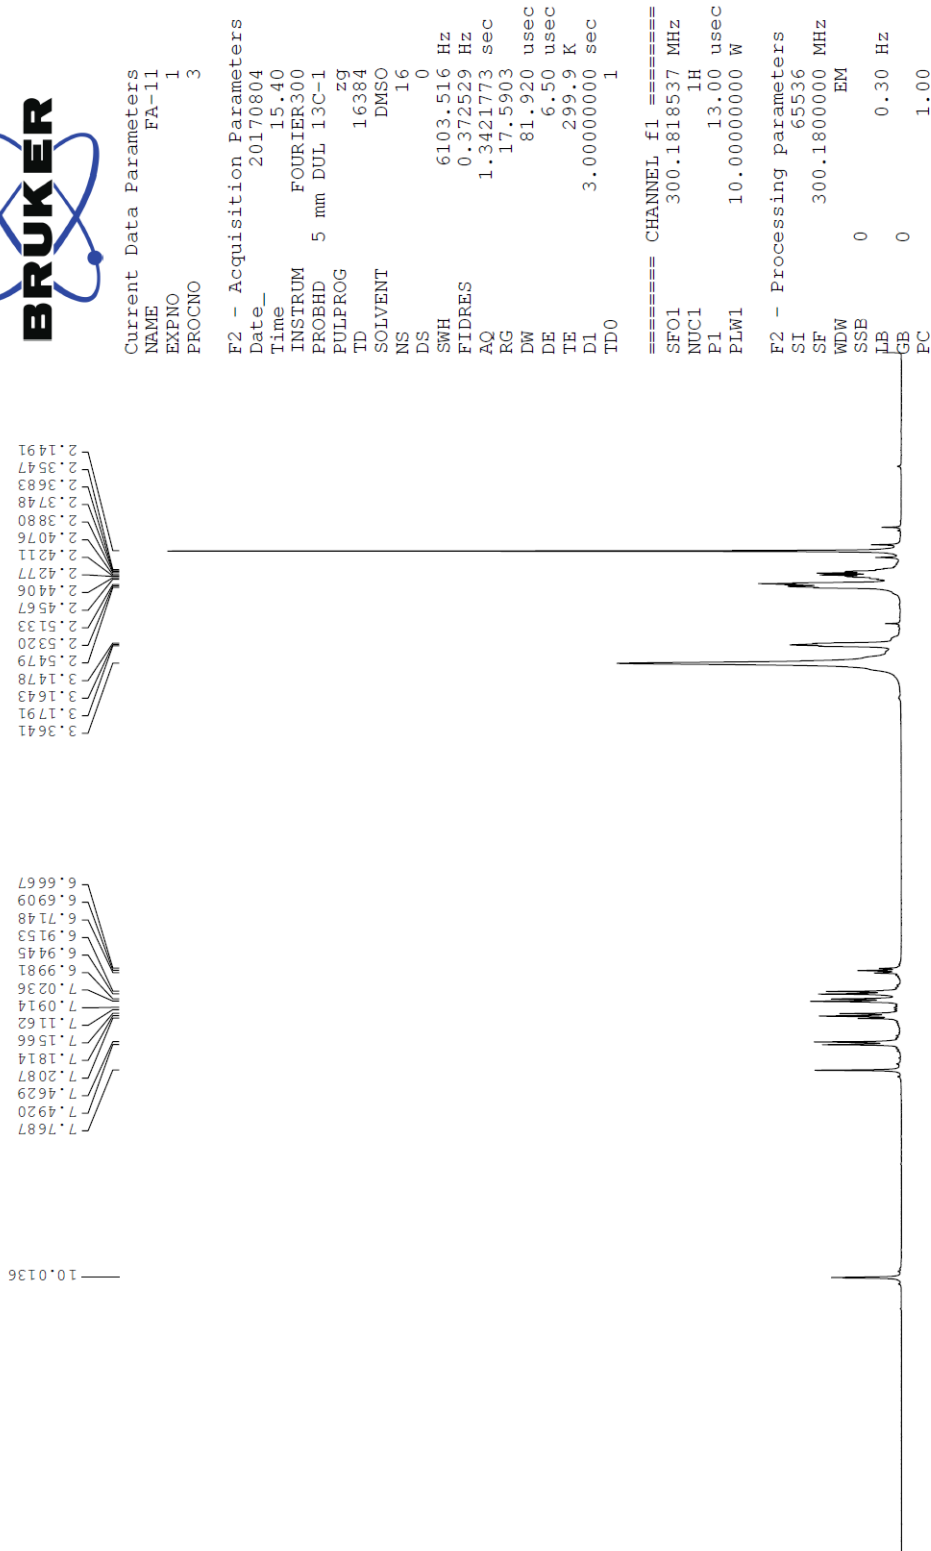

Spectra 50. <sup>1</sup>H NMR spectra of the compound 2m

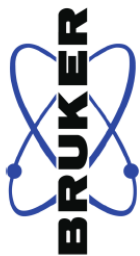

```

Current Data Parameters
NAME          FA-11
EXPNO        2
PROCNO       2

F2 - Acquisition Parameters
Date_        20170804
Time         14.04
INSTRUM      FOURIER300
PROBHD       5 mm DUL 13C-1
PULPROG      zgpg
TD           32768
SOLVENT      DMSO
NS           1829
DS           4
SWH          24414.063 Hz
FIDRES       0.745058 Hz
AQ           0.6710886 sec
RG           501.187
DW           20.480 usec
DE           6.50 usec
TE           300.0 K
D1           1.00000000 sec
D11          0.03000000 sec
D31          0.00001500 sec
D32          0.89999998 sec
D40          0.00093990 sec
L4           23
L5           26
F32          90.00 usec
TD0          1

===== CHANNEL f1 =====
SFO1         75.4878687 MHz
NUC1         13C
P1           15.00 usec
PLW1        15.00000000 W

===== CHANNEL f2 =====
SFO2         300.1812007 MHz
NUC2         1H
CPDPRG2      waltz16
PCPD2        90.00 usec
PLW2        10.00000000 W
PLW12       0.20863999 W
PLW13       0.10495000 W

F2 - Processing parameters
SI           32768
SF           75.4803210 MHz
WDW          EM
SSB          0
LB           0
GB           0
PC           1.40
  
```

39.19  
 39.47  
 39.74  
 40.02  
 40.30  
 40.58  
 40.86  
 46.04  
 48.24  
 53.47  
 56.34  
 57.15

112.19  
 115.41  
 118.57  
 126.65  
 127.12  
 129.50  
 137.68  
 146.18  
 151.29

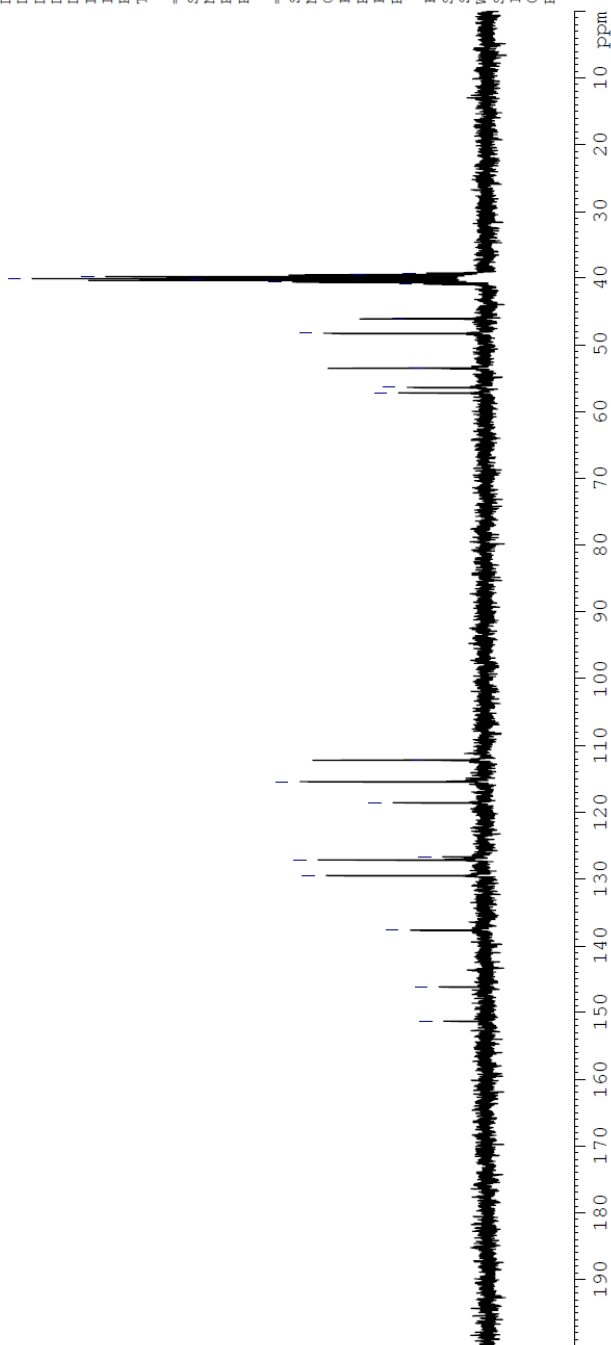

Spectra 51. <sup>13</sup>C NMR spectra of the compound 2m

# LCMSMS ANALYSIS REPORT

Sample Name : FA-11  
Sample ID :  
Data Filename : FA-11\_001.lcd  
Method Filename : geneltarama.lcm  
Batch Filename : batch.lcb  
Vial # : 1-76  
Injection Volume : 1 uL  
Date Acquired : 04.08.2017 14:44:33  
Date Processed : 04.08.2017 14:46:36  
Sample Type : Unknown  
Acquired by : System Administrator  
Processed by : System Administrator

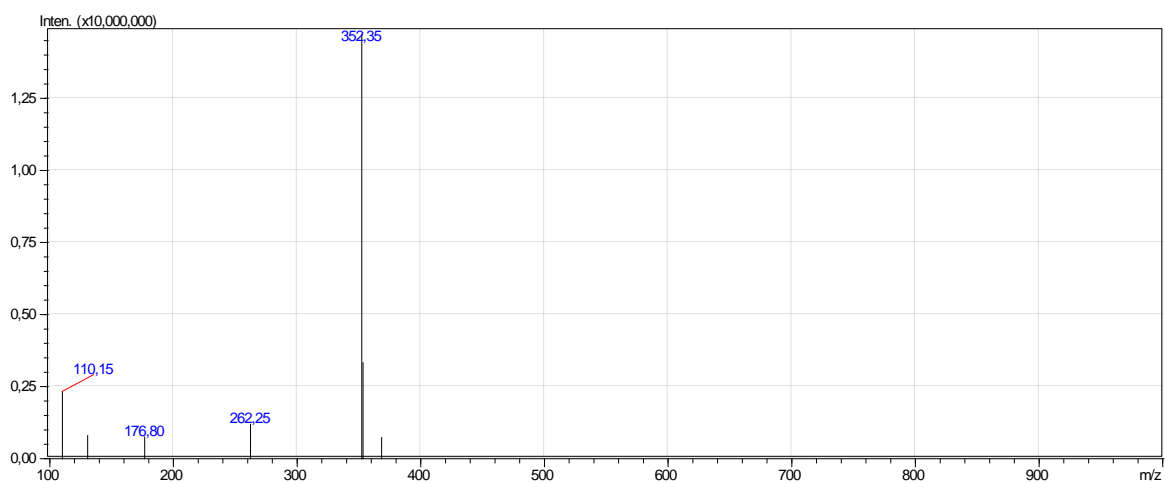

## [MS Spectrum]

# of Peaks 7  
Raw Spectrum [1,624->1,759],(scan:[97->105])  
Background [0,101->0,271],(scan:[7->17])  
Base Peak m/z 352,35 (Inten :

| m/z    | Absolute Intensity | Relative Intensity |
|--------|--------------------|--------------------|
| 110,15 | 2341968            | 15,90              |
| 130,70 | 807890             | 5,48               |
| 176,80 | 761119             | 5,17               |
| 262,25 | 1201700            | 8,16               |
| 352,35 | 14730228           | 100,00             |
| 353,40 | 3336602            | 22,65              |
| 368,30 | 745511             | 5,06               |
| Event  | 1                  |                    |

**Spectra 52.** LCMSMS spectra of the compound 2m

## DOPNALAB

| Item               | Value                                           |
|--------------------|-------------------------------------------------|
| Acquired Date&Time | 7.08.2017 10:33:21                              |
| Acquired by        | System Administrator                            |
| Filename           | C:\Users\dopnalabi\Desktop\derya\faifa-121.ispd |
| Spectrum name      | fa-121                                          |
| Sample name        | fa-12                                           |
| Sample ID          |                                                 |
| Option             |                                                 |
| Comment            |                                                 |
| No. of Scans       | 10                                              |
| Resolution         | 4 (cm-1)                                        |
| Apodization        | Happ-Genzel                                     |

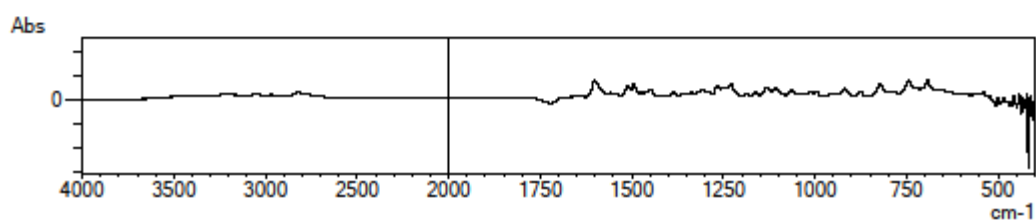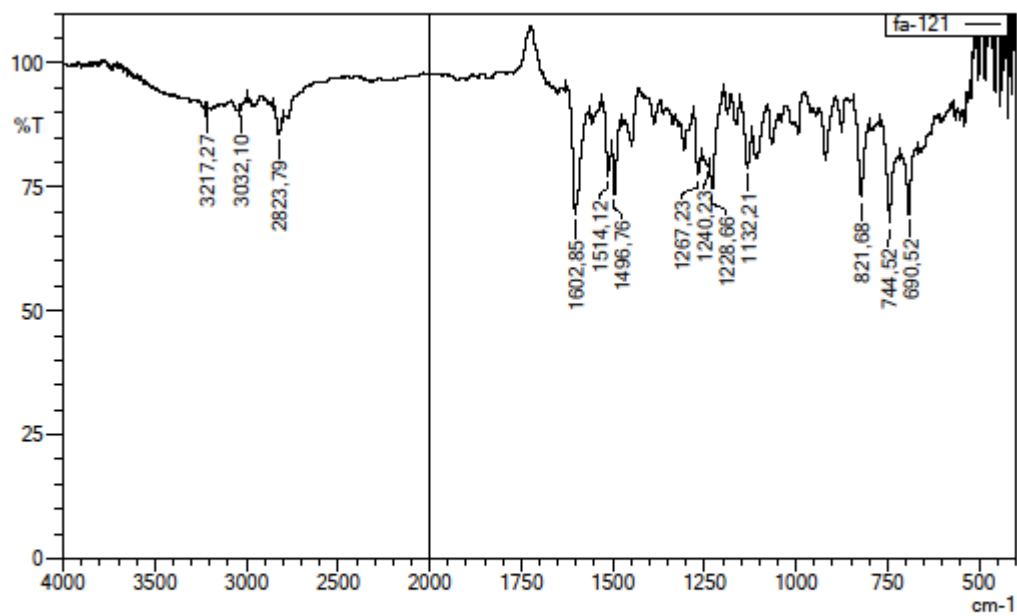

**Spectra 53.** IR spectra of the compound 2n

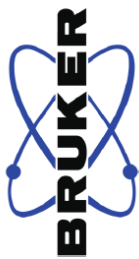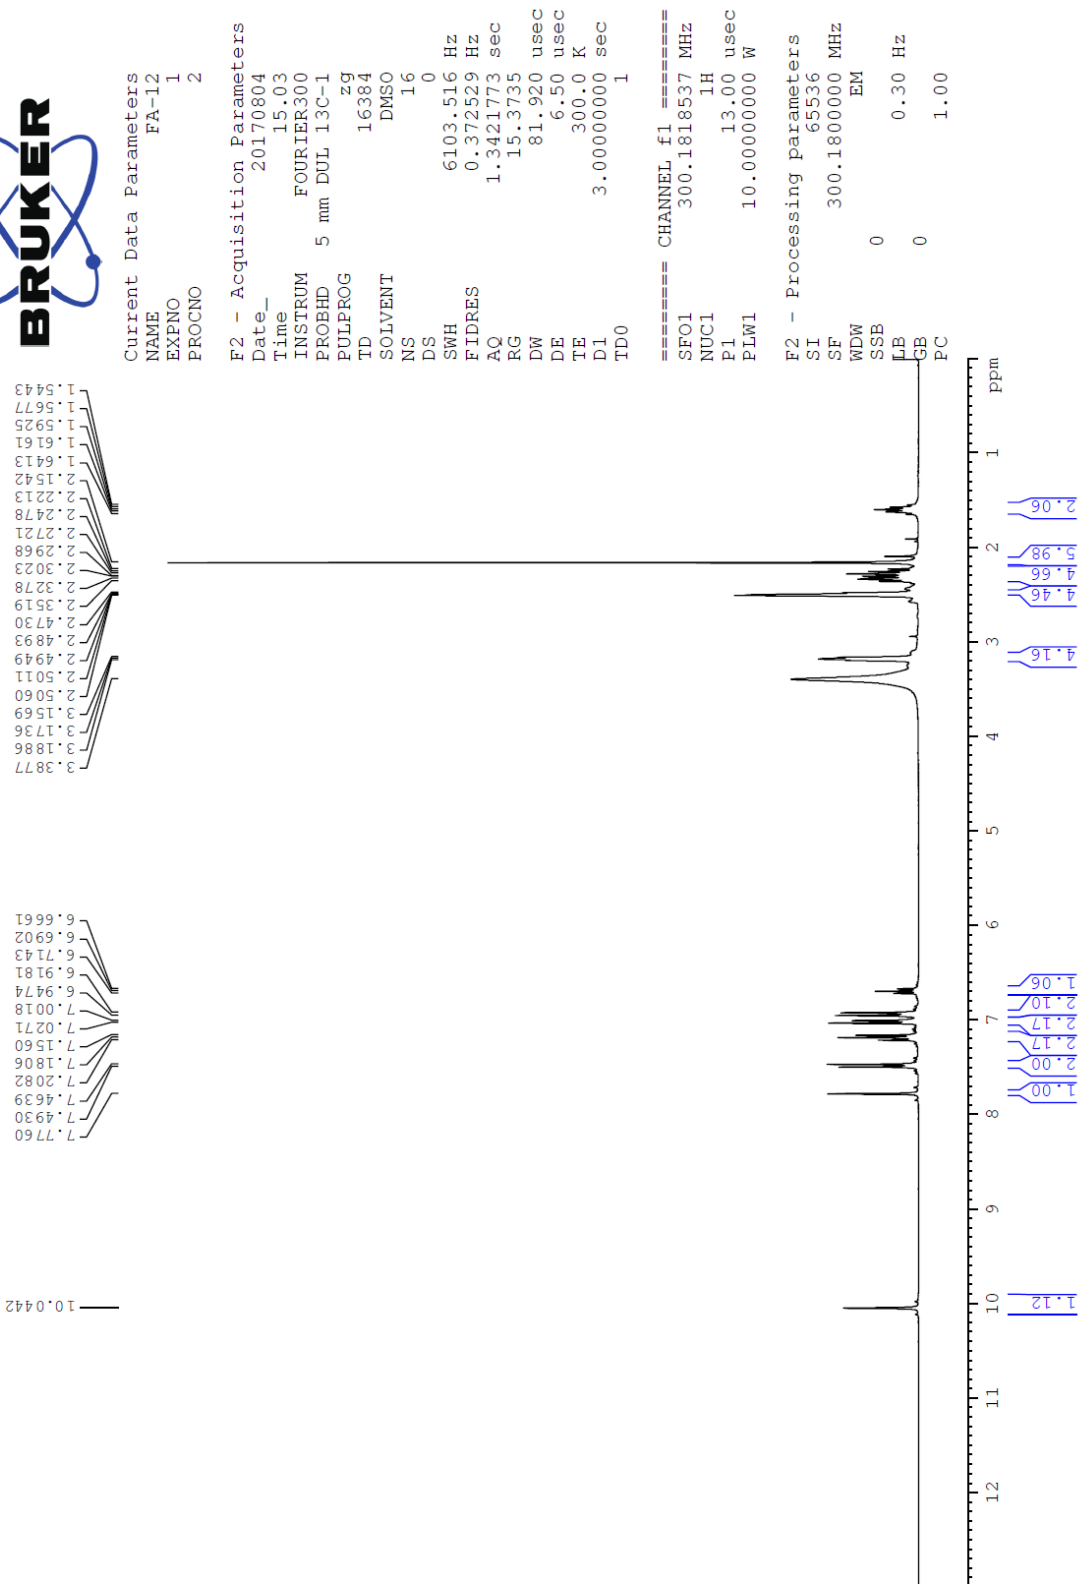

Spectra 54. <sup>1</sup>H NMR spectra of the compound 2n

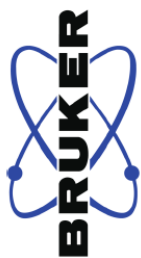

Current Data Parameters  
NAME FA-12  
EXPNO 2  
PROCNO 1

F2 - Acquisition Parameters  
Date\_ 20170804  
Time\_ 15.06  
INSTRUM FOURIER300  
PROBHD 5 mm DUL 13C-1  
PULPROG zgpg  
TD 32768  
SOLVENT DMSO  
NS 1075  
DS 4  
SWH 24414.063 Hz  
FIDRES 0.745058 Hz  
AQ 0.6710886 sec  
RG 501.187  
DM 20.480 usec  
DE 6.50 usec  
TE 299.9 K  
D1 1.00000000 sec  
D11 0.03000000 sec  
D31 0.00001500 sec  
D32 0.89999998 sec  
D40 0.000093990 sec  
L4 23  
L5 26  
F32 90.00 usec  
TD0 1

=====  
CHANNEL f1  
SFO1 75.4878687 MHz  
NUC1 13C  
P1 15.00 usec  
PLW1 15.00000000 W

=====  
CHANNEL f2  
SFO2 300.1812007 MHz  
NUC2 1H  
CFDPERG2 waltz16  
PCPD2 90.00 usec  
PLW2 10.00000000 W  
PLW12 0.20863999 W  
PLW13 0.10495000 W

F2 - Processing parameters  
SI 32768  
SF 75.4803210 MHz  
WDW EM  
SSB 0  
GB 0  
FC 1.40

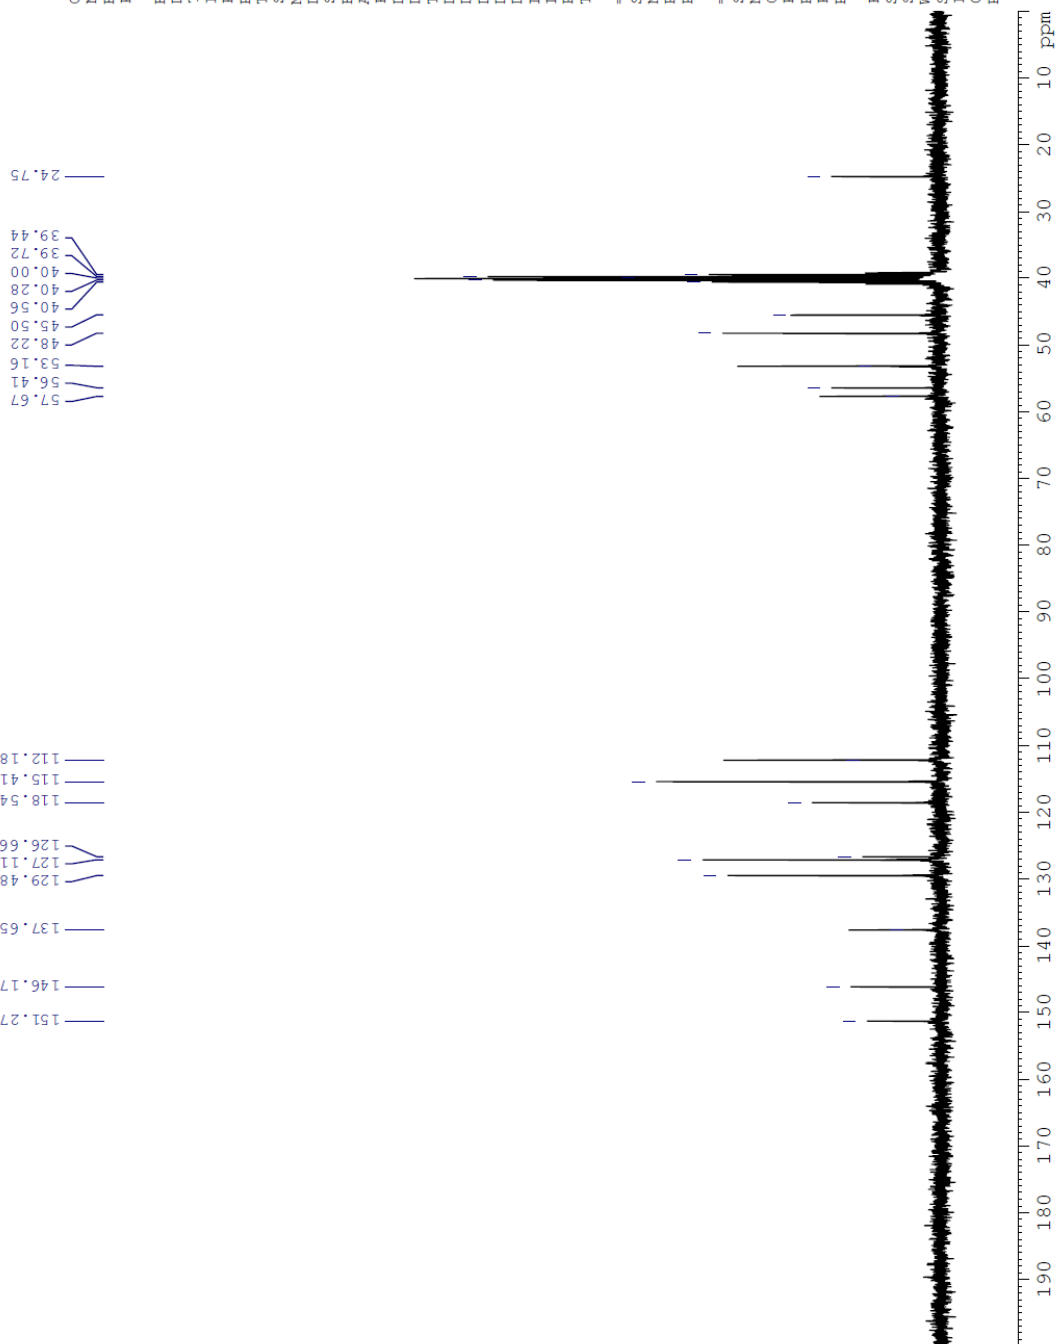

Spectra 55. <sup>13</sup>C NMR spectra of the compound 2n

# LCMSMS ANALYSIS REPORT

Sample Name : FA-12  
Sample ID :  
Data Filename : FA-12\_002.lcd  
Method Filename : geneltarama.lcm  
Batch Filename : batch.lcb  
Vial # : 1-77  
Injection Volume : 1 uL  
Date Acquired : 04.08.2017 14:47:13  
Date Processed : 04.08.2017 14:49:17  
Sample Type : Unknown  
Acquired by : System Administrator  
Processed by : System Administrator

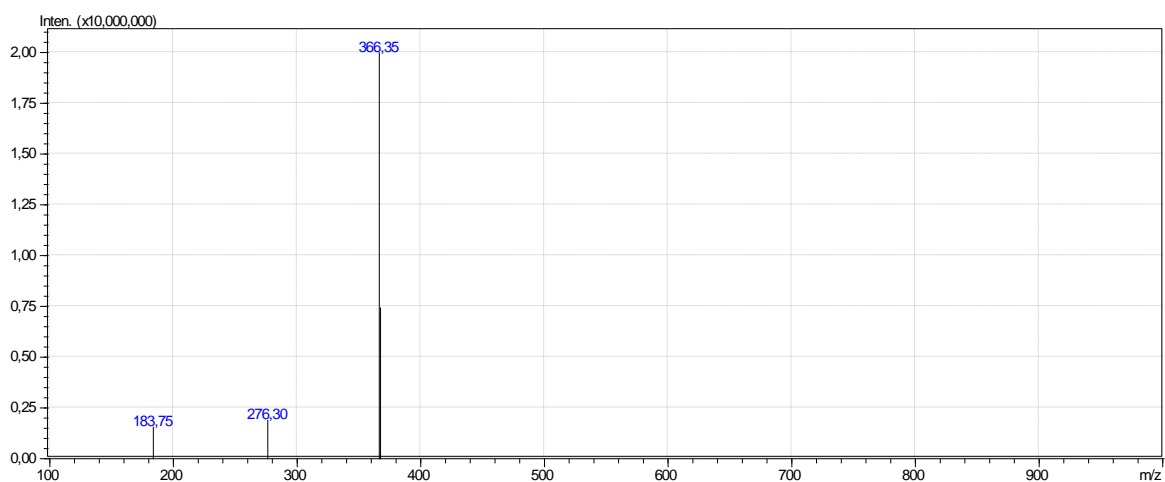

## [MS Spectrum]

# of Peaks 4  
Raw Spectrum [1,590],(scan:[95])  
Background [0,034->0,135],(scan:[3->9])  
Base Peak m/z 366,35 (Inten : 20.000.000)

| m/z    | Absolute Intensity | Relative Intensity |
|--------|--------------------|--------------------|
| 183,75 | 1572286            | 7,86               |
| 276,30 | 1907242            | 9,54               |
| 366,35 | 20000000           | 100,00             |
| 367,40 | 7431947            | 37,16              |
| Event  | 1                  |                    |

**Spectra 56.** LCMSMS spectra of the compound 2n
